# Supplementary material for: [20(22)E]-Lanostane Triterpenes from the Fungus Ganoderma australe
Source: MDPI journal article supplement (doi:10.3390/jof8050503), 2022-05-12
Supplement: s1 [file s1]

Supplementary Materials for

# **[20(22)*E*]-Lanostane Triterpenes from the Fungus *Ganoderma australe***

**Lin Zhou <sup>1,†</sup>, Li-Li Guo <sup>1,†</sup>, Masahiko Isaka <sup>2</sup>, Zheng-Hui Li <sup>1,\*</sup> and He-Ping Chen <sup>1,\*</sup>**

<sup>1</sup> School of Pharmaceutical Sciences, South-Central Minzu University, Wuhan 430074, China;  
2019110443@mail.scuec.edu.cn (L.Z.); g15513998615@163.com (L.-L.G.)

<sup>2</sup> National Center for Genetic Engineering and Biotechnology (BIOTEC), 113 Thailand Science Park,  
Phaholyothin Road, Klong Luang, Pathumthani 12120, Thailand; isaka@biotec.or.th

\* Correspondence: lizhenghui@mail.scuec.edu.cn (Z.-H.L.); chenhp@mail.scuec.edu.cn (H.-P.C.)

† These authors contributed equally to this work.

# Contents

|                                                                                                                 |    |
|-----------------------------------------------------------------------------------------------------------------|----|
| 1. Supplementary Figures.....                                                                                   | 1  |
| Figure S1. <sup>1</sup> H NMR spectrum of <b>1</b> (600 MHz, CD <sub>3</sub> OD).....                           | 1  |
| Figure S2. <sup>13</sup> C and DEPT NMR spectra of <b>1</b> (150 MHz, CD <sub>3</sub> OD). ....                 | 1  |
| Figure S3. HSQC spectrum of <b>1</b> .....                                                                      | 2  |
| Figure S4. HMBC spectrum of <b>1</b> .....                                                                      | 2  |
| Figure S5. <sup>1</sup> H- <sup>1</sup> H COSY spectrum of <b>1</b> . ....                                      | 3  |
| Figure S6. ROESY spectrum of <b>1</b> . ....                                                                    | 3  |
| Figure S7. HRESIMS of <b>1</b> .....                                                                            | 4  |
| Figure S8. <sup>1</sup> H NMR spectrum of <b>2</b> (600 MHz, CDCl <sub>3</sub> ).....                           | 5  |
| Figure S9. <sup>13</sup> C and DEPT NMR spectra of <b>2</b> (150 MHz, CDCl <sub>3</sub> ). ....                 | 5  |
| Figure S10. HSQC spectrum of <b>2</b> .....                                                                     | 6  |
| Figure S11. HMBC spectrum of <b>2</b> .....                                                                     | 6  |
| Figure S12. <sup>1</sup> H- <sup>1</sup> H COSY spectrum of <b>2</b> . ....                                     | 7  |
| Figure S13. ROESY spectrum of <b>2</b> . ....                                                                   | 7  |
| Figure S14. HRESIMS of <b>2</b> .....                                                                           | 8  |
| Figure S15. <sup>1</sup> H NMR spectrum of <b>3</b> (500 MHz, CDCl <sub>3</sub> ).....                          | 9  |
| Figure S16. <sup>13</sup> C and DEPT NMR spectra of <b>3</b> (125 MHz, CDCl <sub>3</sub> ). ....                | 9  |
| Figure S17. HSQC spectrum of <b>3</b> .....                                                                     | 10 |
| Figure S18. HMBC spectrum of <b>3</b> .....                                                                     | 10 |
| Figure S19. <sup>1</sup> H- <sup>1</sup> H COSY spectrum of <b>3</b> . ....                                     | 11 |
| Figure S20. ROESY spectrum of <b>3</b> . ....                                                                   | 11 |
| Figure S21. HRESIMS of <b>3</b> .....                                                                           | 12 |
| Figure S22. <sup>1</sup> H NMR spectrum of <b>4</b> (600 MHz, CD <sub>3</sub> COCD <sub>3</sub> ). ....         | 13 |
| Figure S23. <sup>13</sup> C and DEPT NMR spectra of <b>4</b> (150 MHz, CD <sub>3</sub> COCD <sub>3</sub> )..... | 13 |
| Figure S24. HSQC spectrum of <b>4</b> .....                                                                     | 14 |
| Figure S25. HMBC spectrum of <b>4</b> .....                                                                     | 14 |
| Figure S26. <sup>1</sup> H- <sup>1</sup> H COSY spectrum of <b>4</b> . ....                                     | 15 |
| Figure S27. ROESY spectrum of <b>4</b> . ....                                                                   | 15 |
| Figure S28. HRESIMS of <b>4</b> .....                                                                           | 16 |
| Figure S29. <sup>1</sup> H NMR spectrum of <b>5</b> (600 MHz, CDCl <sub>3</sub> ).....                          | 17 |
| Figure S30. <sup>13</sup> C and DEPT NMR spectra of <b>5</b> (150 MHz, CDCl <sub>3</sub> ). ....                | 17 |
| Figure S31. HSQC spectrum of <b>5</b> .....                                                                     | 18 |
| Figure S32. HMBC spectrum of <b>5</b> .....                                                                     | 18 |
| Figure S33. <sup>1</sup> H- <sup>1</sup> H COSY spectrum of <b>5</b> . ....                                     | 19 |
| Figure S34. ROESY spectrum of <b>5</b> . ....                                                                   | 19 |
| Figure S35. HRESIMS of <b>5</b> .....                                                                           | 20 |
| Figure S36. <sup>1</sup> H NMR spectrum of <b>6</b> (600 MHz, CDCl <sub>3</sub> ).....                          | 21 |
| Figure S37. <sup>13</sup> C and DEPT NMR spectra of <b>6</b> (150 MHz, CDCl <sub>3</sub> ). ....                | 21 |
| Figure S38. HSQC spectrum of <b>6</b> .....                                                                     | 22 |
| Figure S39. HMBC spectrum of <b>6</b> .....                                                                     | 22 |
| Figure S40. <sup>1</sup> H- <sup>1</sup> H COSY spectrum of <b>6</b> . ....                                     | 23 |
| Figure S41. ROESY spectrum of <b>6</b> . ....                                                                   | 23 |
| Figure S42. HRESIMS of <b>6</b> .....                                                                           | 24 |
| Figure S43. <sup>1</sup> H NMR spectrum of <b>7</b> (800 MHz, CDCl <sub>3</sub> ).....                          | 25 |
| Figure S44. <sup>13</sup> C NMR spectra of <b>7</b> (200 MHz, CDCl <sub>3</sub> ). ....                         | 25 |
| Figure S45. HSQC spectrum of <b>7</b> .....                                                                     | 26 |
| Figure S46. HMBC spectrum of <b>7</b> .....                                                                     | 26 |

|                                                                                            |    |
|--------------------------------------------------------------------------------------------|----|
| Figure S47. $^1\text{H}$ - $^1\text{H}$ COSY spectrum of <b>7</b> .                        | 27 |
| Figure S48. ROESY spectrum of <b>7</b> .                                                   | 27 |
| Figure S49. HRESIMS of <b>7</b> .                                                          | 28 |
| Figure S50. $^1\text{H}$ NMR spectrum of <b>8</b> (600 MHz, $\text{CDCl}_3$ ).             | 29 |
| Figure S51. $^{13}\text{C}$ NMR spectra of <b>8</b> (150 MHz, $\text{CDCl}_3$ ).           | 29 |
| Figure S52. HSQC spectrum of <b>8</b> .                                                    | 30 |
| Figure S53. HMBC spectrum of <b>8</b> .                                                    | 30 |
| Figure S54. $^1\text{H}$ - $^1\text{H}$ COSY spectrum of <b>8</b> .                        | 31 |
| Figure S55. ROESY spectrum of <b>8</b> .                                                   | 31 |
| Figure S56. HRESIMS of <b>8</b> .                                                          | 32 |
| Figure S57. $^1\text{H}$ NMR spectrum of <b>9</b> (600 MHz, $\text{CDCl}_3$ ).             | 33 |
| Figure S58. $^{13}\text{C}$ and DEPT NMR spectra of <b>9</b> (150 MHz, $\text{CDCl}_3$ ).  | 33 |
| Figure S59. HSQC spectrum of <b>9</b> .                                                    | 34 |
| Figure S60. HMBC spectrum of <b>9</b> .                                                    | 34 |
| Figure S61. $^1\text{H}$ - $^1\text{H}$ COSY spectrum of <b>9</b> .                        | 35 |
| Figure S62. ROESY spectrum of <b>9</b> .                                                   | 35 |
| Figure S63. HRESIMS of <b>9</b> .                                                          | 36 |
| Figure S64. $^1\text{H}$ NMR spectrum of <b>10</b> (600 MHz, $\text{CDCl}_3$ ).            | 37 |
| Figure S65. $^{13}\text{C}$ and DEPT NMR spectra of <b>10</b> (150 MHz, $\text{CDCl}_3$ ). | 37 |
| Figure S66. HSQC spectrum of <b>10</b> .                                                   | 38 |
| Figure S67. HMBC spectrum of <b>10</b> .                                                   | 38 |
| Figure S68. $^1\text{H}$ - $^1\text{H}$ COSY spectrum of <b>10</b> .                       | 39 |
| Figure S69. ROESY spectrum of <b>10</b> .                                                  | 39 |
| Figure S70. HRESIMS of <b>10</b> .                                                         | 40 |
| Figure S71. $^1\text{H}$ NMR spectrum of <b>11</b> (600 MHz, $\text{CDCl}_3$ ).            | 41 |
| Figure S72. $^{13}\text{C}$ and DEPT NMR spectra of <b>11</b> (150 MHz, $\text{CDCl}_3$ ). | 41 |
| Figure S73. HSQC spectrum of <b>11</b> .                                                   | 42 |
| Figure S74. HMBC spectrum of <b>11</b> .                                                   | 42 |
| Figure S75. $^1\text{H}$ - $^1\text{H}$ COSY spectrum of <b>11</b> .                       | 43 |
| Figure S76. ROESY spectrum of <b>11</b> .                                                  | 43 |
| Figure S77. HRESIMS of <b>11</b> .                                                         | 44 |
| Figure S78. $^1\text{H}$ NMR spectrum of <b>12</b> (600 MHz, $\text{CDCl}_3$ ).            | 45 |
| Figure S79. $^{13}\text{C}$ and DEPT NMR spectra of <b>12</b> (150 MHz, $\text{CDCl}_3$ ). | 45 |
| Figure S80. HSQC spectrum of <b>12</b> .                                                   | 46 |
| Figure S81. HMBC spectrum of <b>12</b> .                                                   | 46 |
| Figure S82. $^1\text{H}$ - $^1\text{H}$ COSY spectrum of <b>12</b> .                       | 47 |
| Figure S83. ROESY spectrum of <b>12</b> .                                                  | 47 |
| Figure S84. HRESIMS of <b>12</b> .                                                         | 48 |
| Figure S85. $^1\text{H}$ NMR spectrum of <b>13</b> (600 MHz, $\text{CDCl}_3$ ).            | 49 |
| Figure S86. $^{13}\text{C}$ and DEPT NMR spectra of <b>13</b> (150 MHz, $\text{CDCl}_3$ ). | 49 |
| Figure S87. HSQC spectrum of <b>13</b> .                                                   | 50 |
| Figure S88. HMBC spectrum of <b>13</b> .                                                   | 50 |
| Figure S89. $^1\text{H}$ - $^1\text{H}$ COSY spectrum of <b>13</b> .                       | 51 |
| Figure S90. ROESY spectrum of <b>13</b> .                                                  | 51 |
| Figure S91. HRESIMS of <b>13</b> .                                                         | 52 |
| Figure S92. $^1\text{H}$ NMR spectrum of <b>1a</b> (600 MHz, $\text{CDCl}_3$ ).            | 53 |
| Figure S93. $^1\text{H}$ - $^1\text{H}$ COSY spectrum of <b>1a</b> .                       | 53 |
| Figure S94. $^1\text{H}$ NMR spectrum of <b>1b</b> (600 MHz, $\text{CDCl}_3$ ).            | 54 |
| Figure S95. $^1\text{H}$ - $^1\text{H}$ COSY spectrum of <b>1b</b> .                       | 54 |

|                                                                                                  |                                     |
|--------------------------------------------------------------------------------------------------|-------------------------------------|
| Figure S96. HRESIMS of <b>1a</b> .....                                                           | 55                                  |
| Figure S97. HRESIMS of <b>1b</b> .....                                                           | 56                                  |
| Figure S98. <sup>1</sup> H NMR spectrum of <b>2a</b> (600 MHz, CDCl <sub>3</sub> ).....          | 57                                  |
| Figure S99. <sup>1</sup> H- <sup>1</sup> H COSY spectrum of <b>2a</b> . ....                     | 57                                  |
| Figure S100. <sup>1</sup> H NMR spectrum of <b>2b</b> (600 MHz, CDCl <sub>3</sub> ).....         | 58                                  |
| Figure S101. <sup>1</sup> H- <sup>1</sup> H COSY spectrum of <b>2b</b> . ....                    | 58                                  |
| Figure S102. HRESIMS of <b>2a</b> .....                                                          | 59                                  |
| Figure S103. HRESIMS of <b>2b</b> .....                                                          | 60                                  |
| Figure S104. <sup>1</sup> H NMR spectrum of <b>3a</b> (600 MHz, CDCl <sub>3</sub> ).....         | 61                                  |
| Figure S105. <sup>1</sup> H- <sup>1</sup> H COSY spectrum of <b>3a</b> . ....                    | 61                                  |
| Figure S106. <sup>1</sup> H NMR spectrum of <b>3b</b> (600 MHz, CDCl <sub>3</sub> ).....         | 62                                  |
| Figure S107. <sup>1</sup> H- <sup>1</sup> H COSY spectrum of <b>3b</b> . ....                    | 62                                  |
| Figure S108. HRESIMS of <b>3a</b> . ....                                                         | 63                                  |
| Figure S109. HRESIMS of <b>3b</b> .....                                                          | 64                                  |
| Figure S110. <sup>1</sup> H NMR spectrum of <b>6H</b> (600 MHz, CDCl <sub>3</sub> ).....         | 65                                  |
| Figure S111. <sup>13</sup> C NMR spectrum of <b>6H</b> (600 MHz, CDCl <sub>3</sub> ).....        | 65                                  |
| Figure S112. <sup>1</sup> H NMR spectrum of <b>6Ha</b> (600 MHz, CDCl <sub>3</sub> ).....        | 66                                  |
| Figure S113. <sup>1</sup> H- <sup>1</sup> H COSY spectrum of <b>6Ha</b> . ....                   | 66                                  |
| Figure S114. <sup>1</sup> H NMR spectrum of <b>6Hb</b> (600 MHz, CDCl <sub>3</sub> ).....        | 67                                  |
| Figure S115. <sup>1</sup> H- <sup>1</sup> H COSY spectrum of <b>6Hb</b> . ....                   | 67                                  |
| Figure S116. HRESIMS of <b>6Ha</b> . ....                                                        | 68                                  |
| Figure S117. HRESIMS of <b>6Hb</b> . ....                                                        | 69                                  |
| 2. Spectroscopic data of compound 6. ....                                                        | 70                                  |
| Figure S118 The key HMBC and <sup>1</sup> H- <sup>1</sup> H COSY correlations of <b>6</b> . .... | 70                                  |
| 3. Biological assays .....                                                                       | 71                                  |
| 3.1 Cytotoxicity assays .....                                                                    | 71                                  |
| 3.2 $\alpha$ -Glucosidase inhibition assays .....                                                | 71                                  |
| 3.3 Protein tyrosine phosphate 1 $\beta$ (PTP1B) inhibition assays.....                          | 71                                  |
| 3.2 Dipeptidyl peptidase 4 (DDP4) inhibition assays.....                                         | 71                                  |
| 3.3 Angiotensin converting enzyme 2 (ACE2) inhibition assays .....                               | 71                                  |
| References: .....                                                                                | <b>Error! Bookmark not defined.</b> |

# 1. Supplementary Figures

Figure S1.  $^1\text{H}$  NMR spectrum of **1** (600 MHz,  $\text{CD}_3\text{OD}$ ).

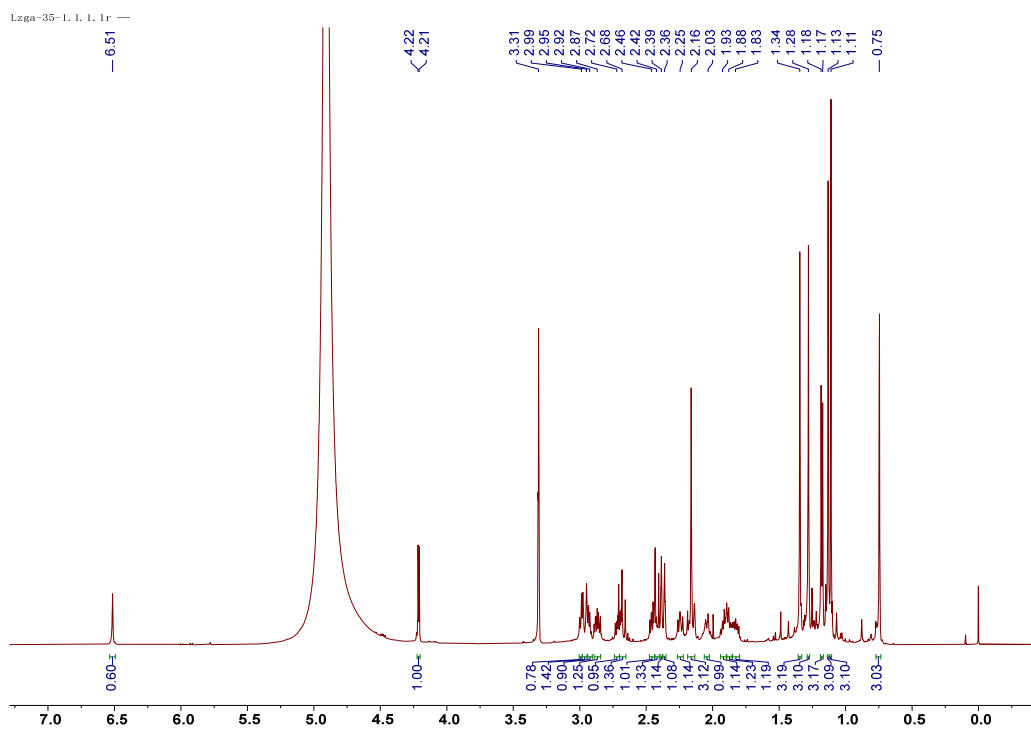

Figure S2.  $^{13}\text{C}$  and DEPT NMR spectra of **1** (150 MHz,  $\text{CD}_3\text{OD}$ ).

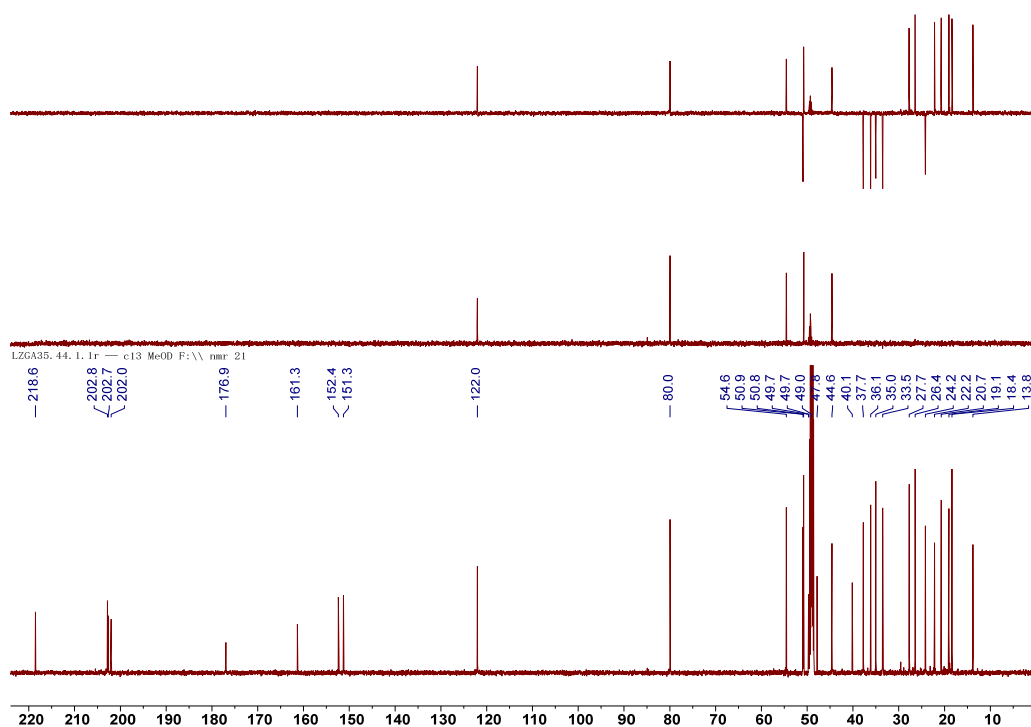

Figure S3. HSQC spectrum of **1**.

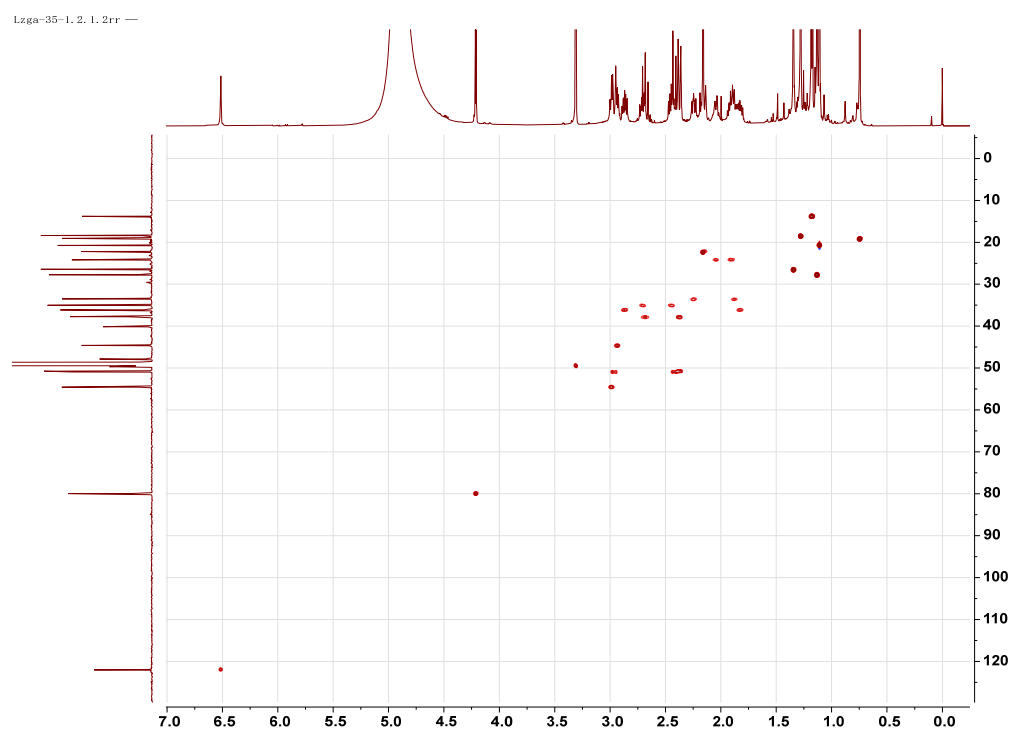

Figure S4. HMBC spectrum of **1**.

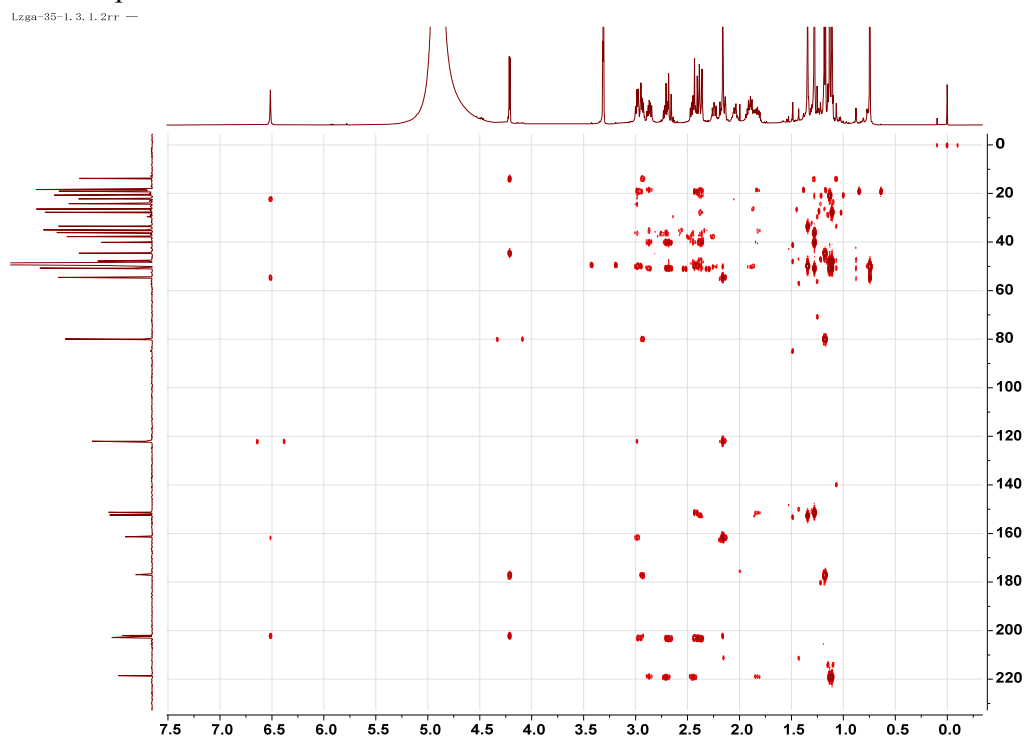

Lzga-35-1.4.1.2rr —

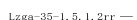

Lzga-35-1.5.1.2rr —

Figure S7. HRESIMS of **1**.

LZGA-35 #13 RT: 0.17 AV: 1 NL: 4.53E7  
T: FTMS + p ESI Full ms [300.0000-1300.0000]

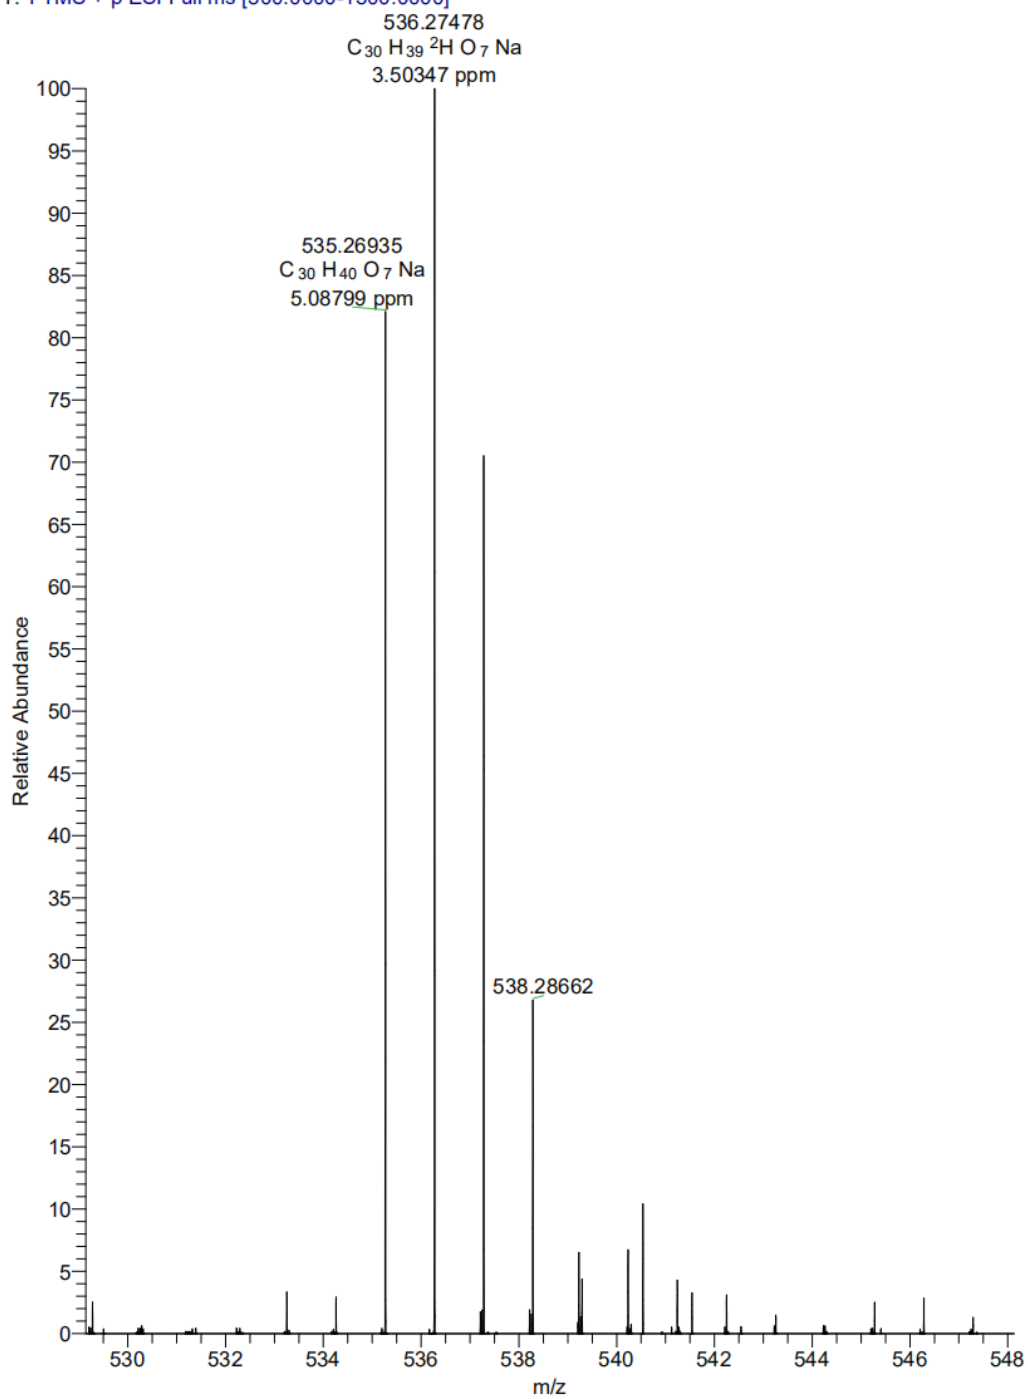



Figure S8.  $^1\text{H}$  NMR spectrum of **2** (600 MHz,  $\text{CDCl}_3$ ).

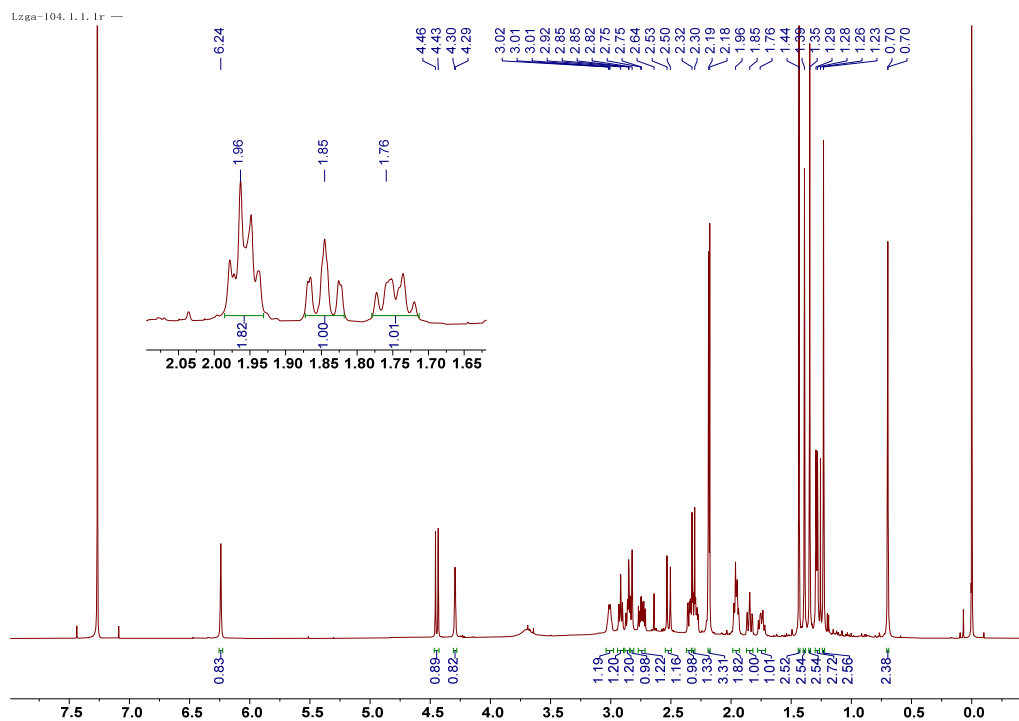

Figure S9.  $^{13}\text{C}$  and DEPT NMR spectra of **2** (150 MHz,  $\text{CDCl}_3$ ).

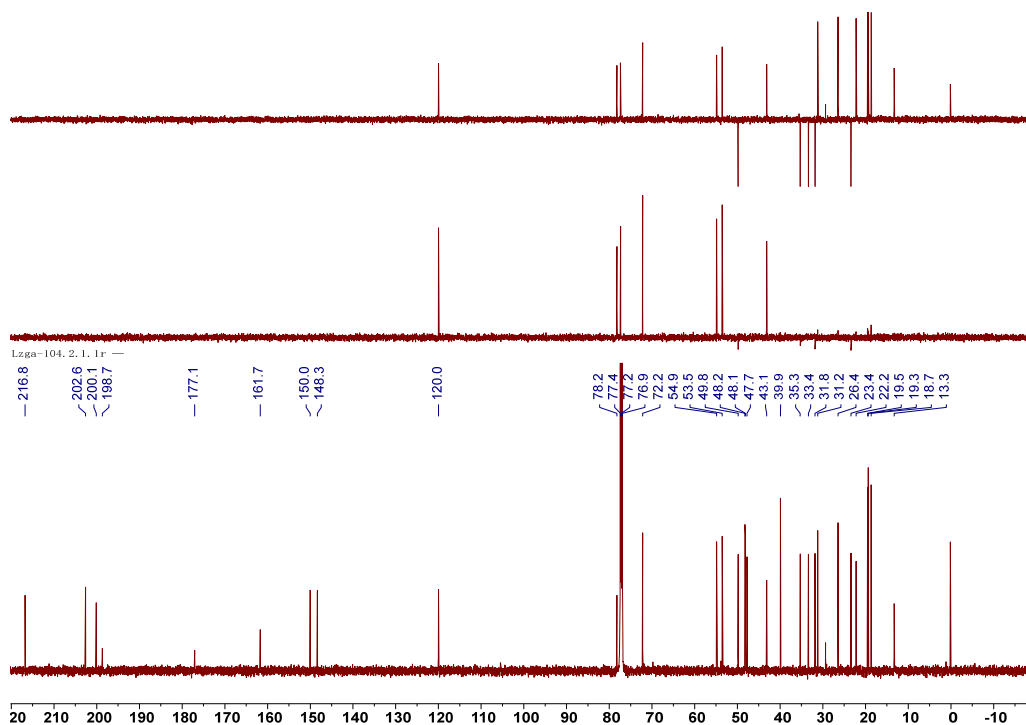

Figure S10. HSQC spectrum of **2**.

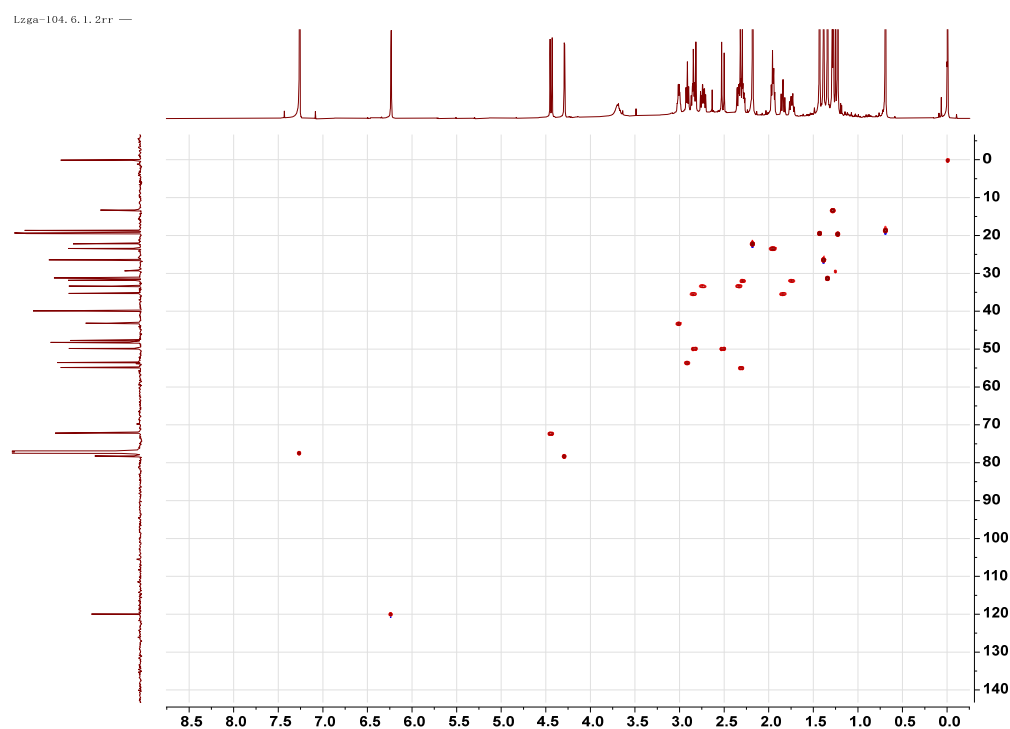

Figure S11. HMBC spectrum of **2**.

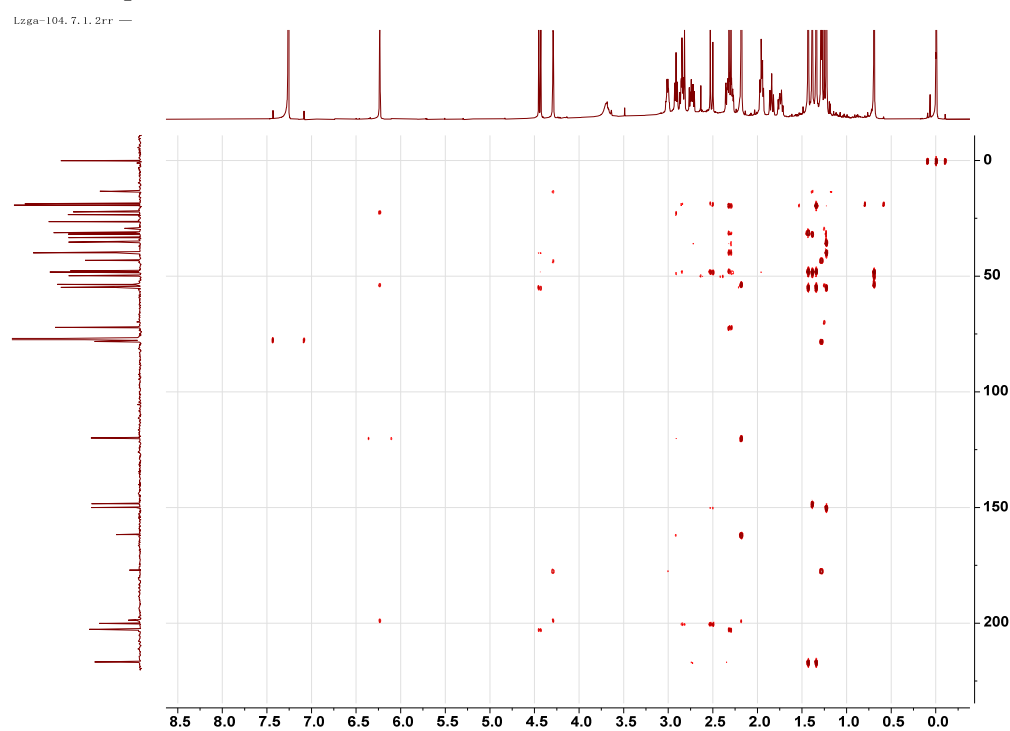

Figure S12.  $^1\text{H}$ - $^1\text{H}$  COSY spectrum of **2**.

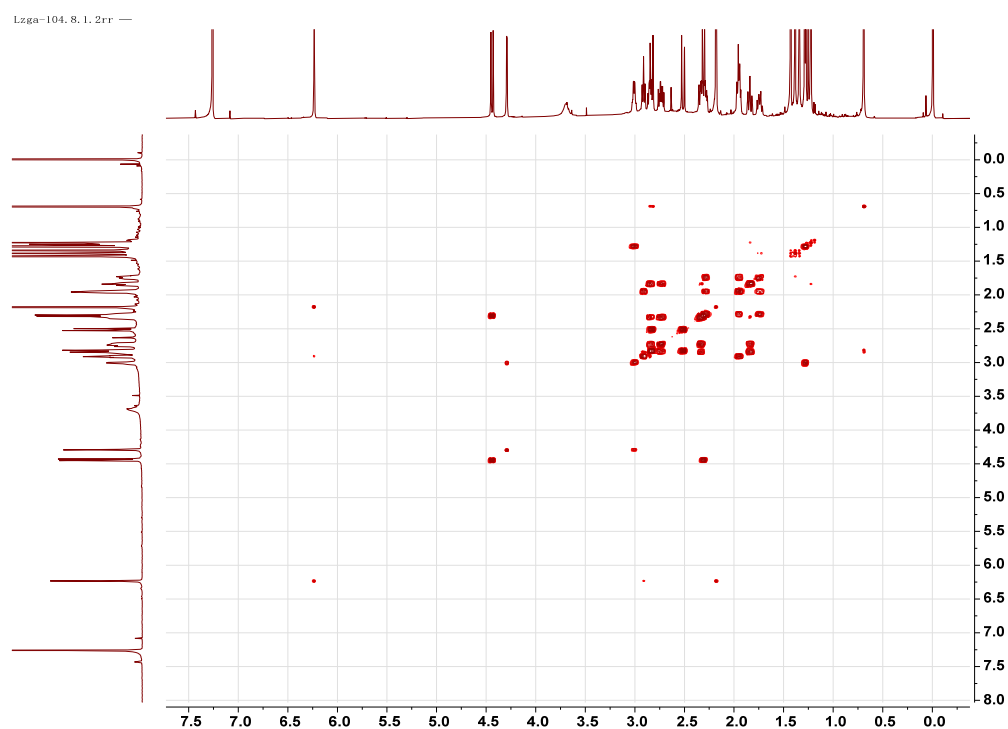

Figure S13. ROESY spectrum of **2**.

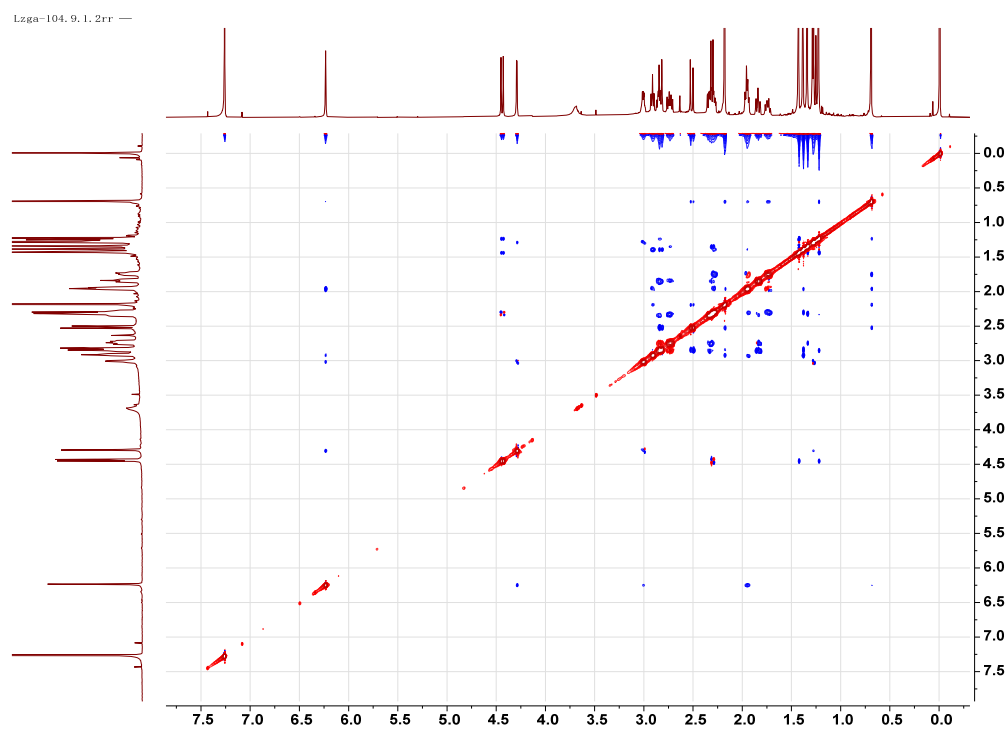

Figure S14. HRESIMS of **2**.

D:\spectrum\lzga\Zga-104\ZGA-104

2021/5/21 12:46:42

ZGA-104 #13 RT: 0.17 AV: 1 NL: 2.48E8

T: FTMS + p ESI Full ms [300.0000-1300.0000]

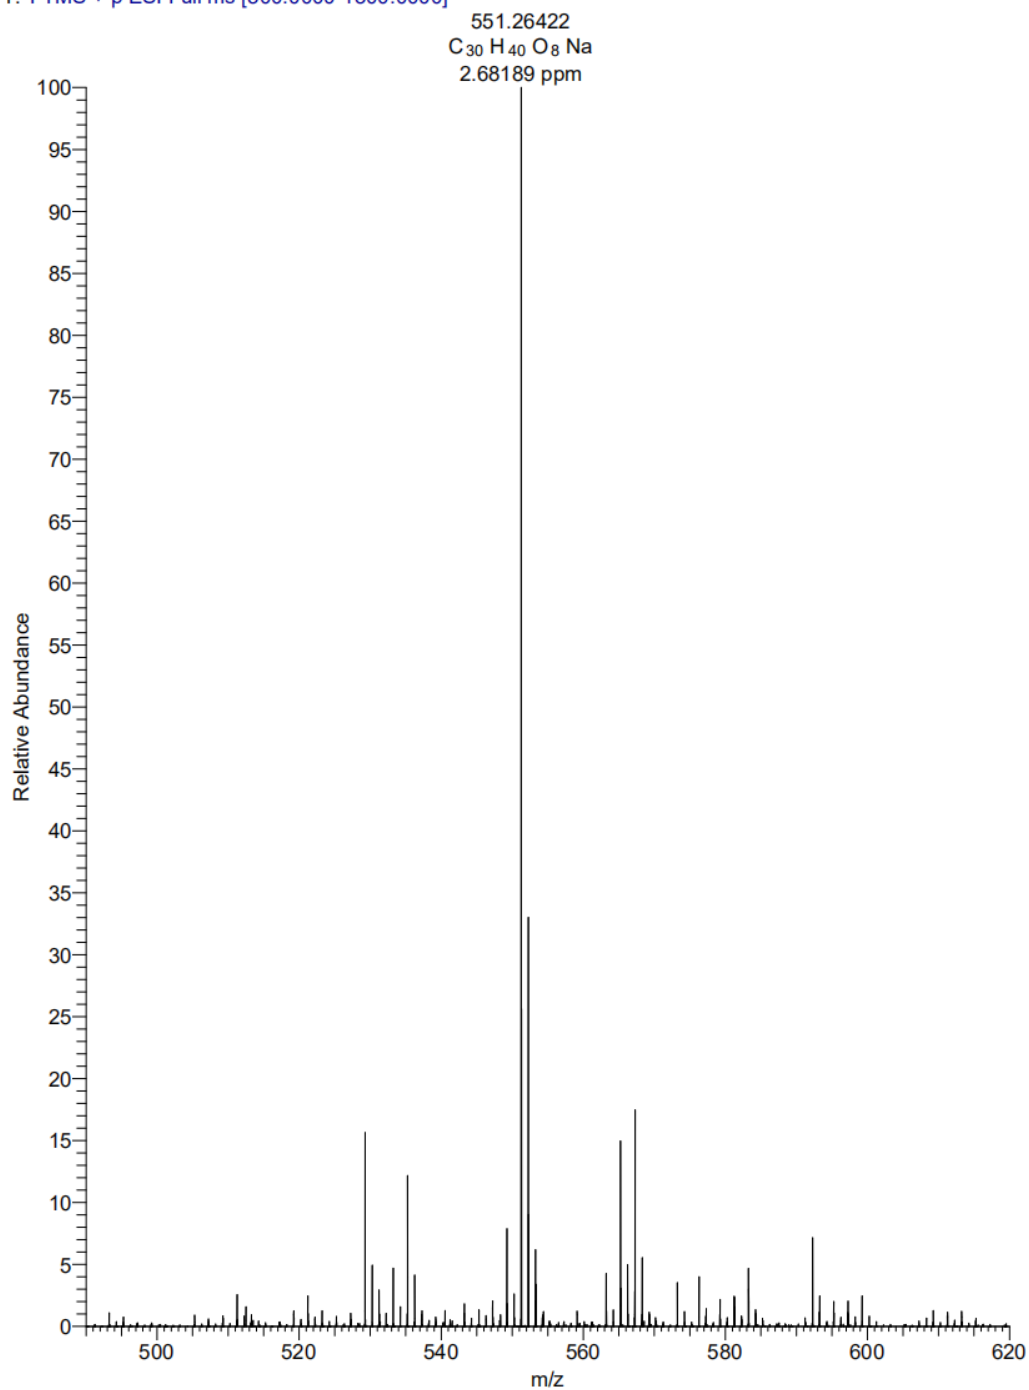

Figure S15.  $^1\text{H}$  NMR spectrum of **3** (500 MHz,  $\text{CDCl}_3$ ).

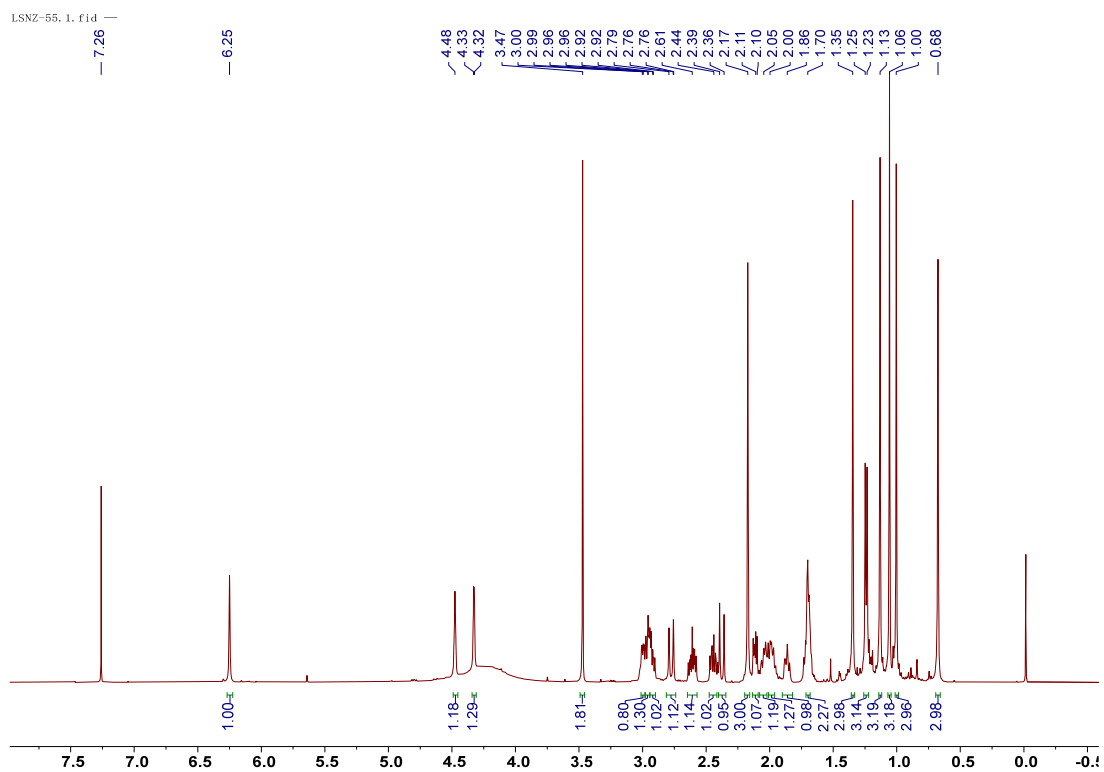

Figure S16.  $^{13}\text{C}$  and DEPT NMR spectra of **3** (125 MHz,  $\text{CDCl}_3$ ).

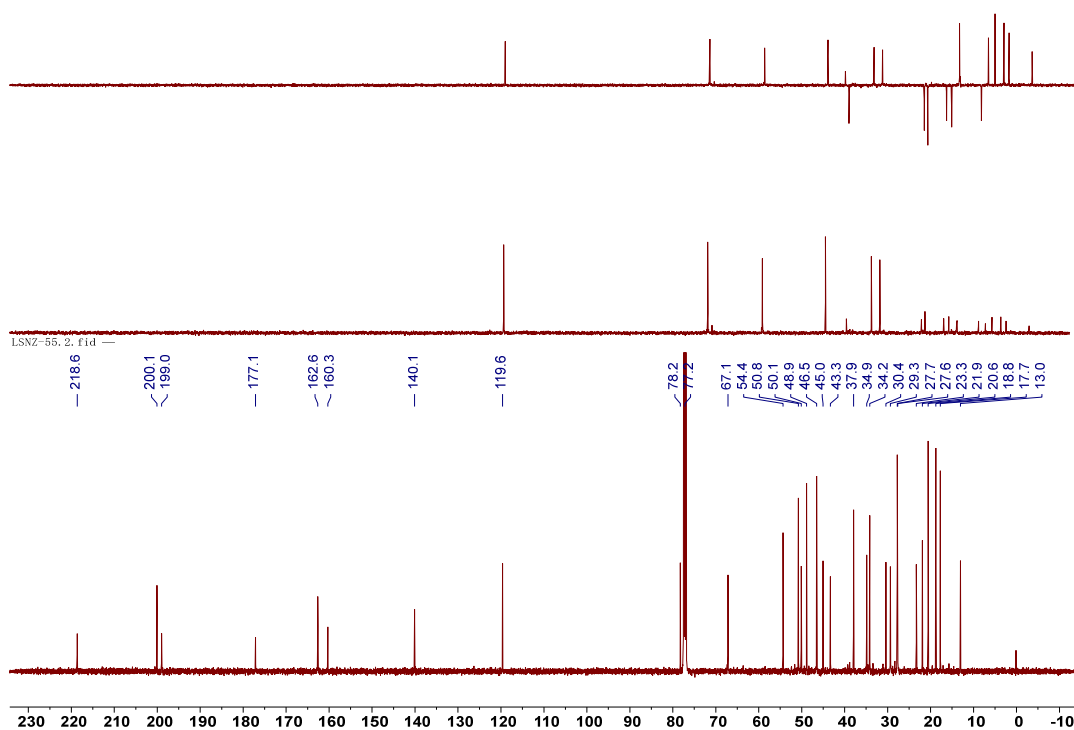

Figure S17. HSQC spectrum of **3**.

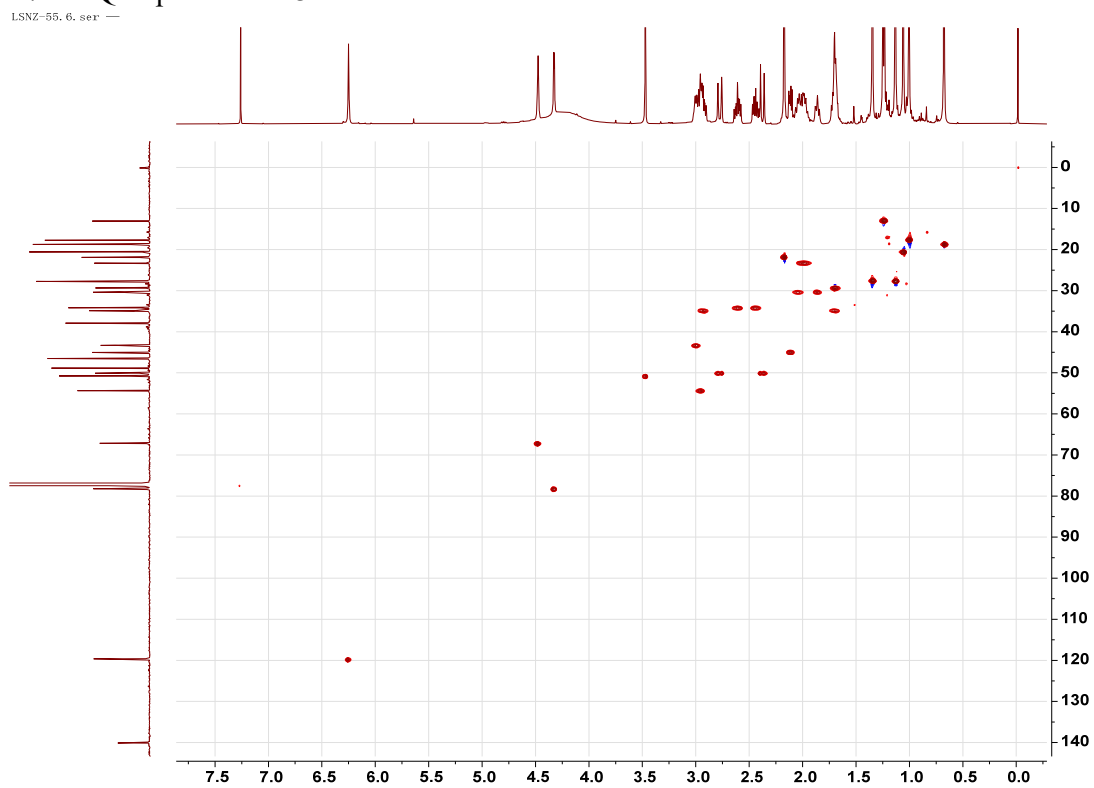

Figure S18. HMBC spectrum of **3**.

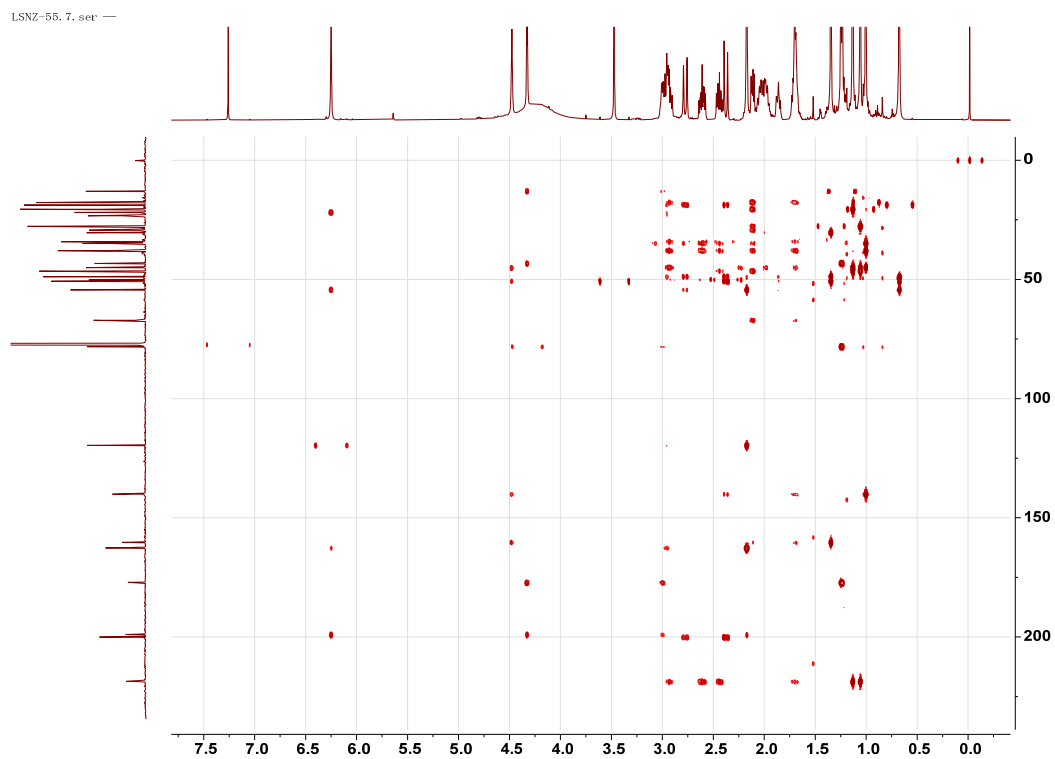

Figure S19.  $^1\text{H}$ - $^1\text{H}$  COSY spectrum of **3**.

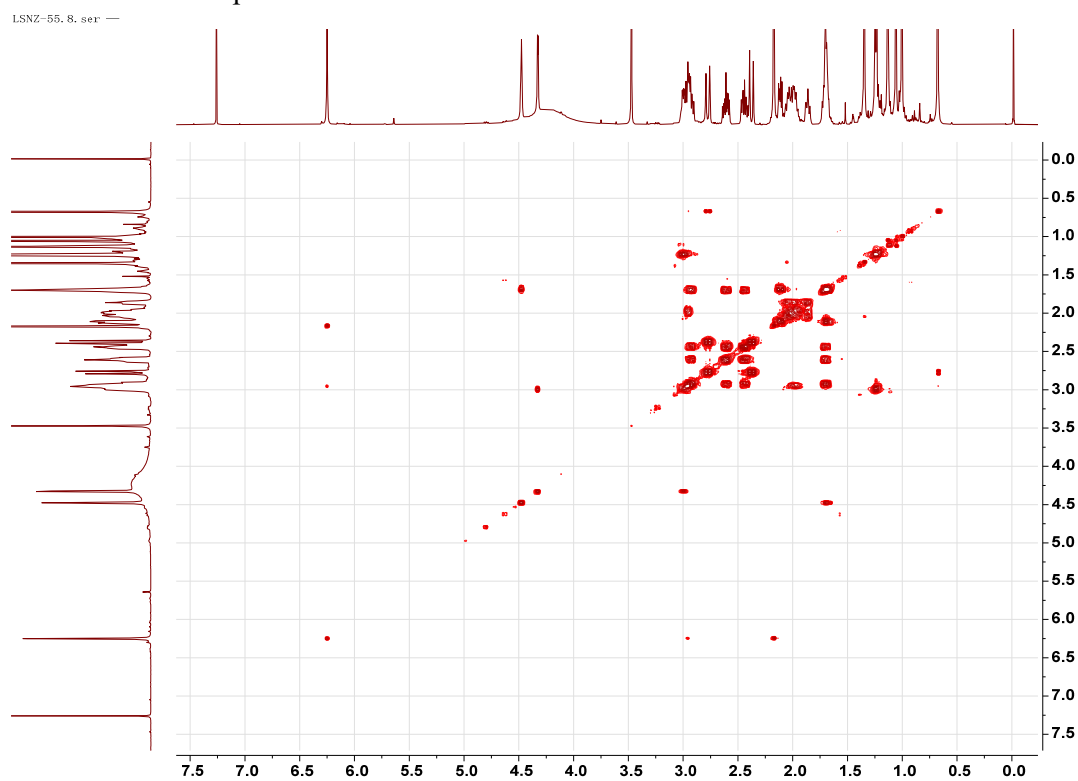

Figure S20. ROESY spectrum of **3**.

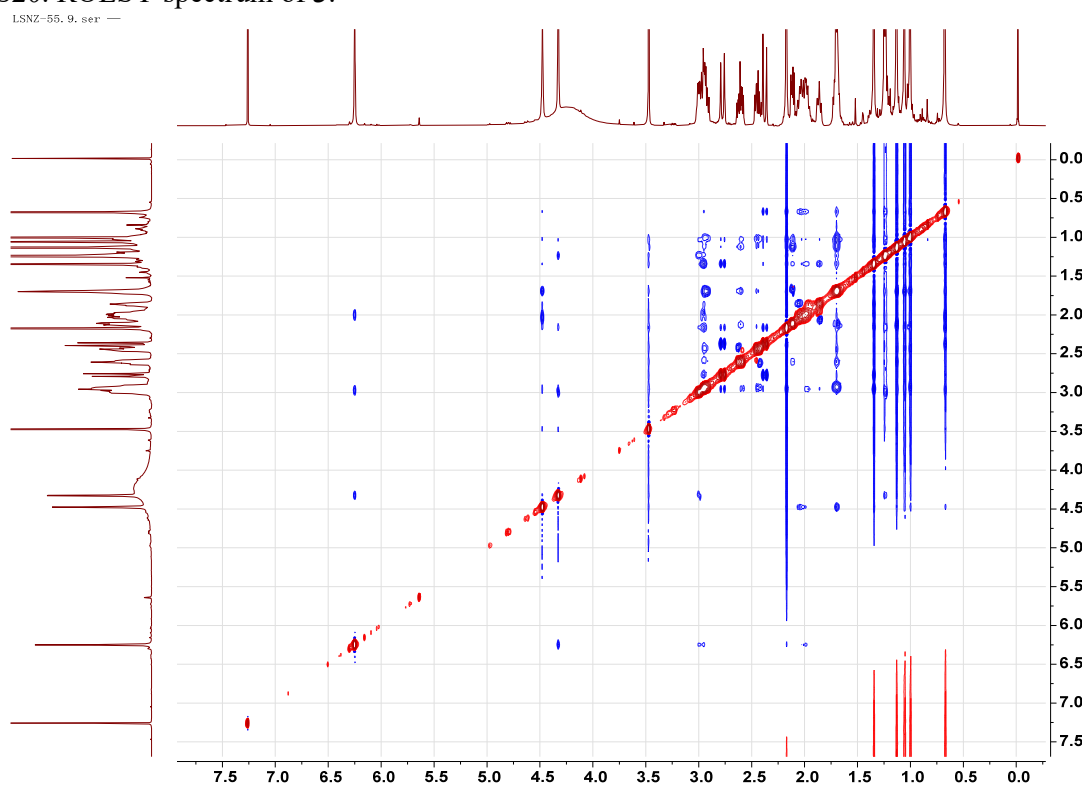

Figure S21. HRESIMS of **3**.

LSN2-55 #485 RT: 6.84 AV: 1 NL: 9.85E8

T: FTMS + p ESI Full lock ms [100.0000-1500.0000]

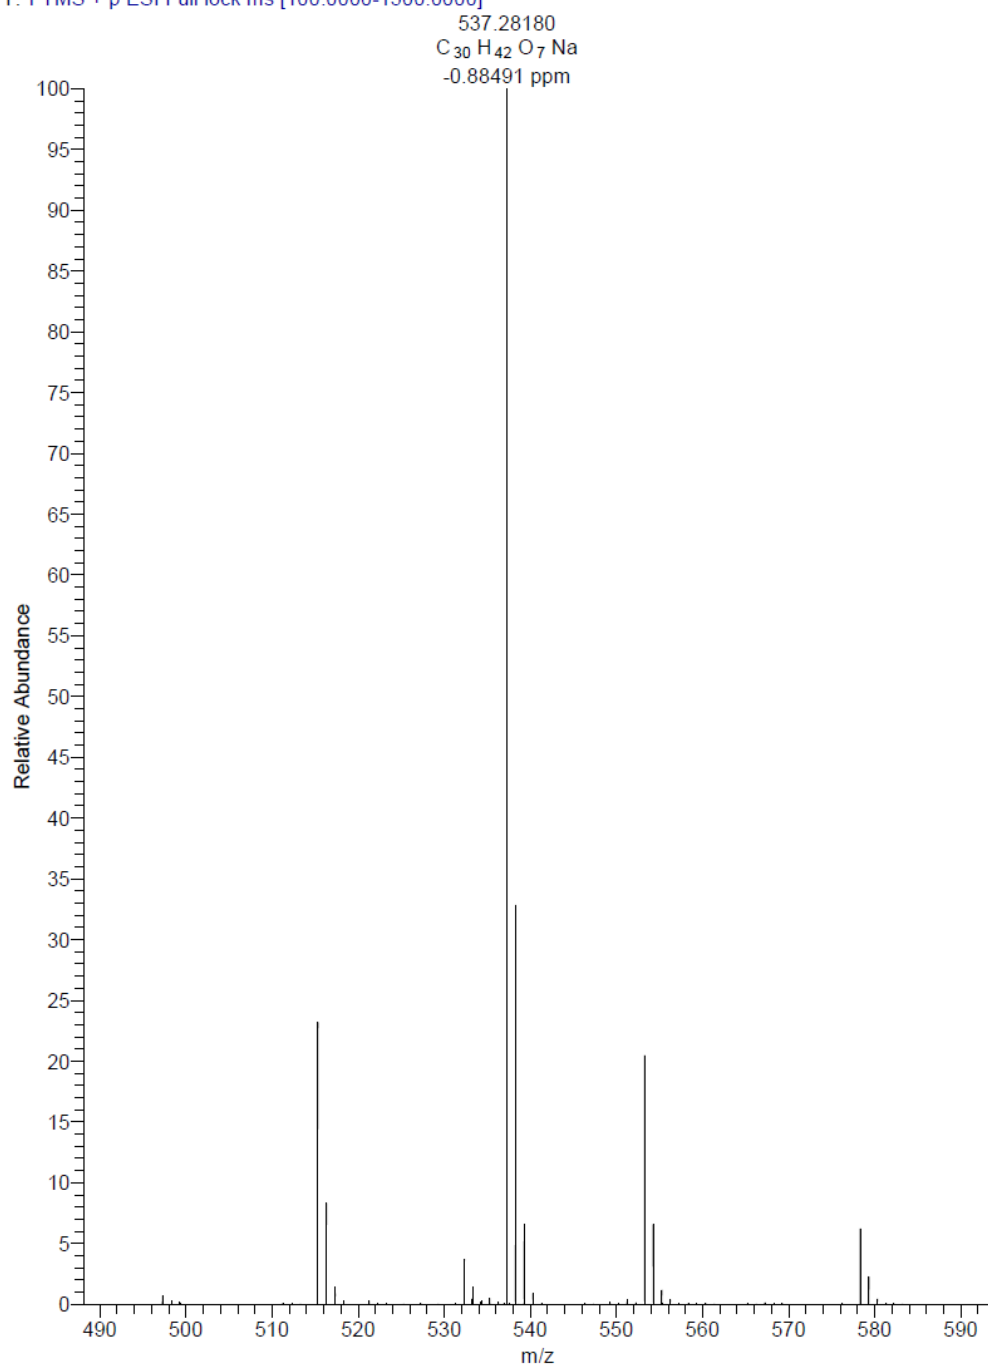



Figure S22.  $^1\text{H}$  NMR spectrum of **4** (600 MHz,  $\text{CD}_3\text{COCD}_3$ ).

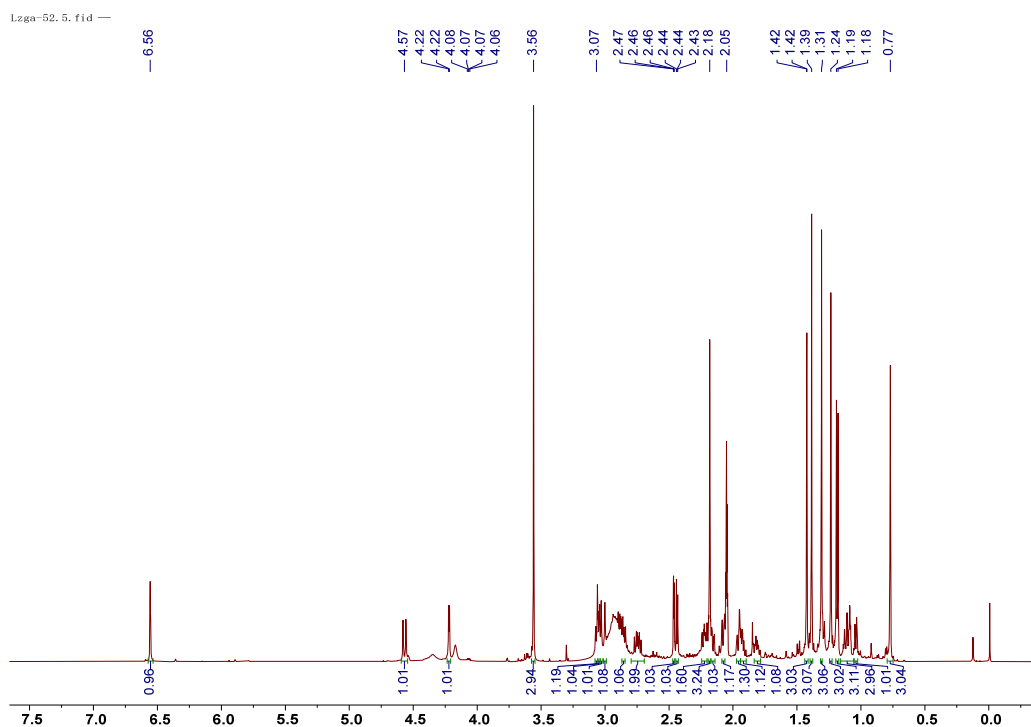

Figure S23.  $^{13}\text{C}$  and DEPT NMR spectra of **4** (150 MHz,  $\text{CD}_3\text{COCD}_3$ ).

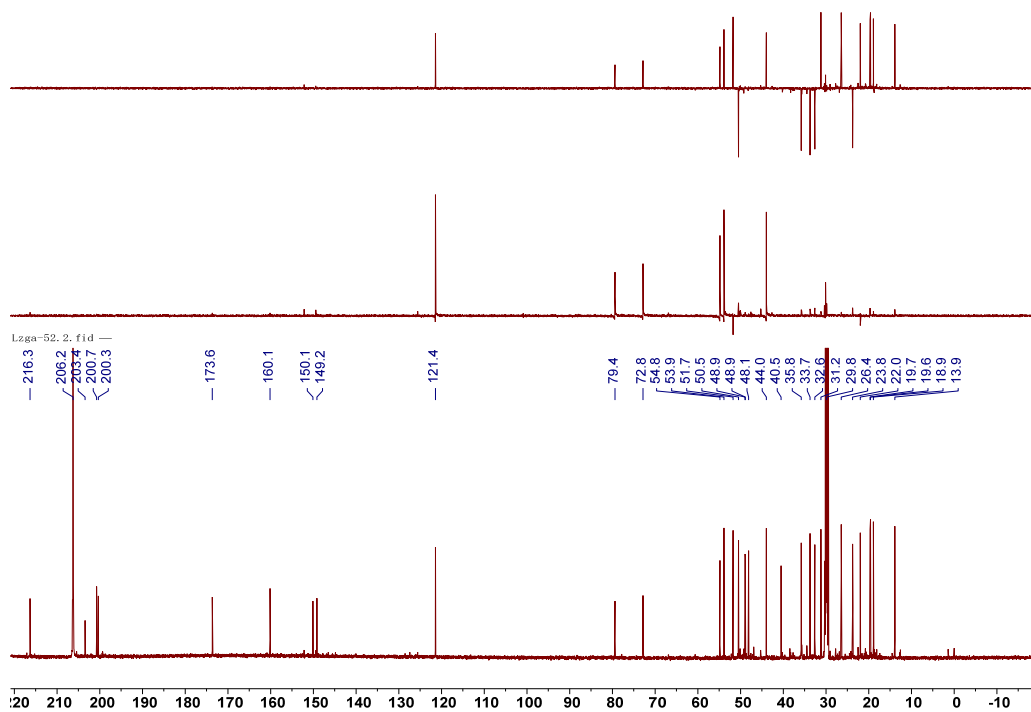

Figure S24. HSQC spectrum of **4**.

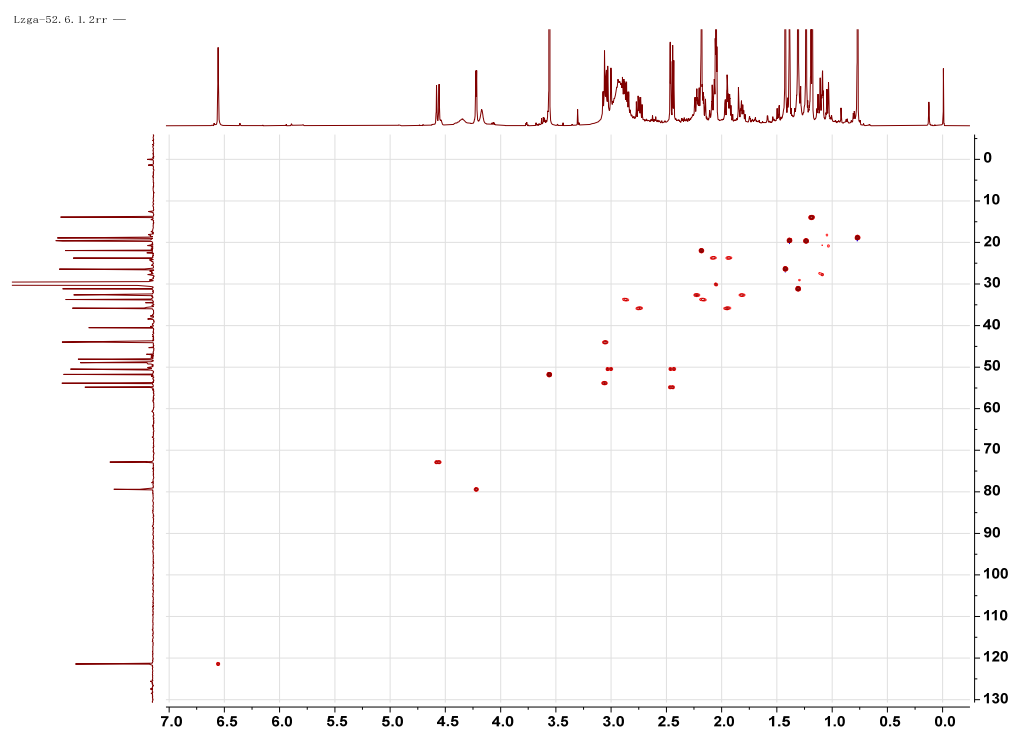

Figure S25. HMBC spectrum of **4**.

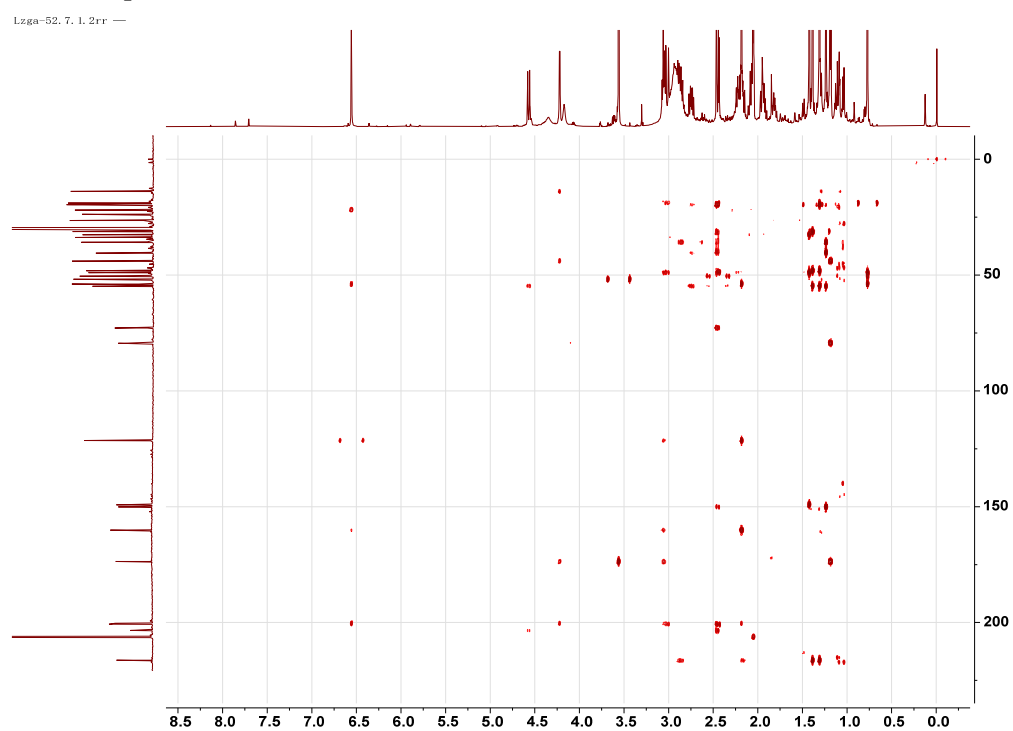

Figure S26.  $^1\text{H}$ - $^1\text{H}$  COSY spectrum of **4**.

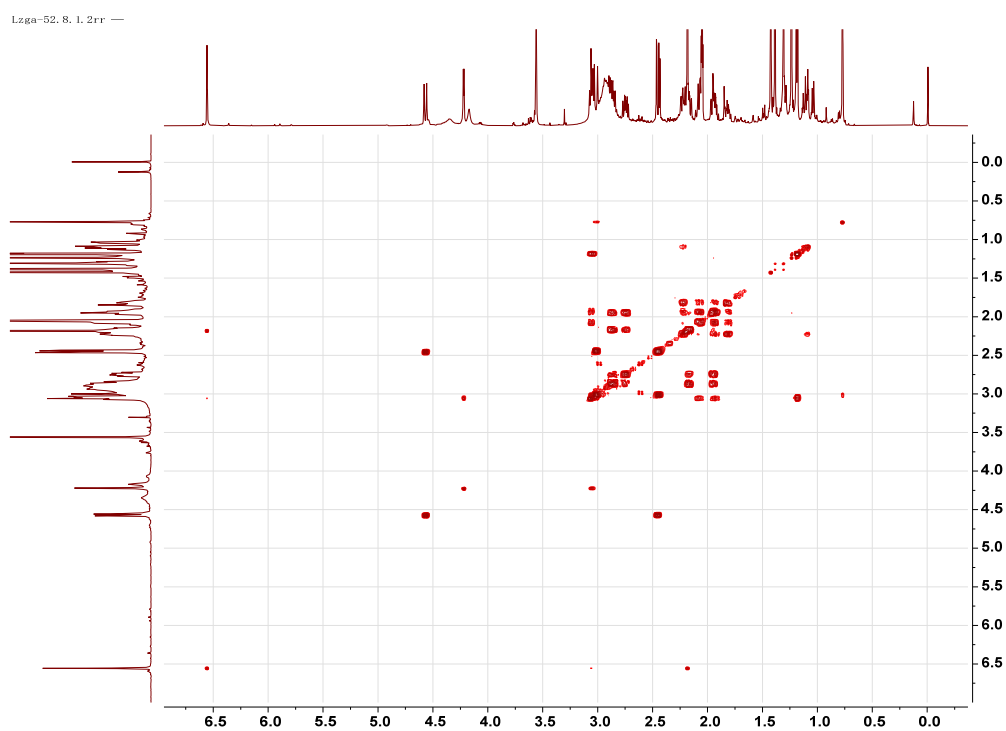

Figure S27. ROESY spectrum of **4**.

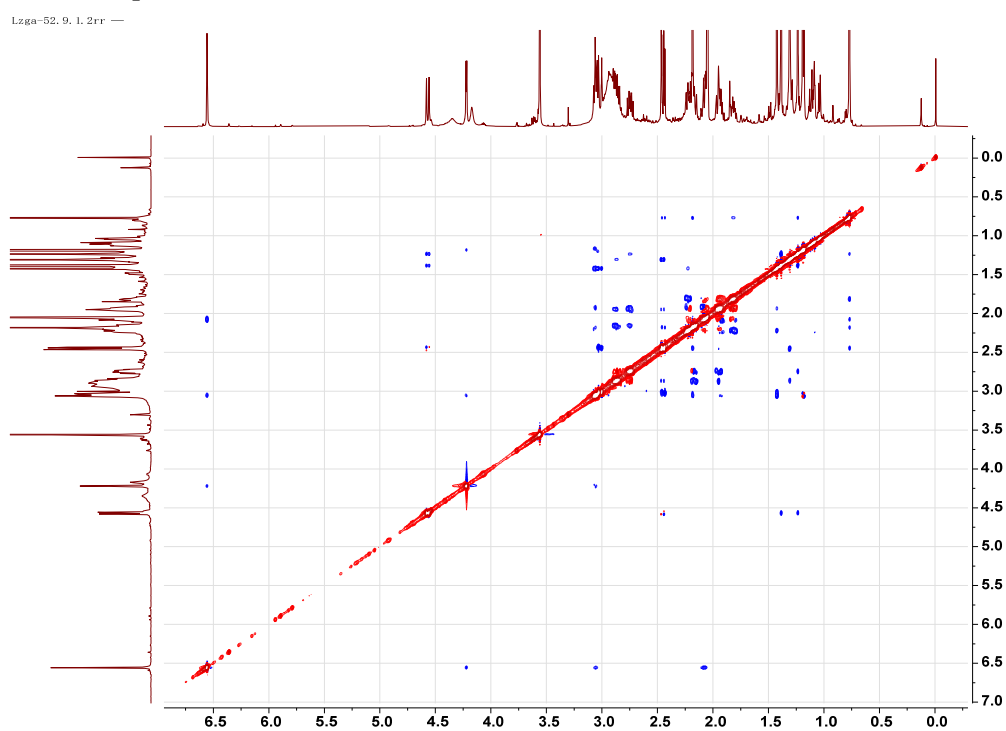

Figure S28. HRESIMS of **4**.

D:\spectrum\...LZGA-52

2021/6/18 10:05:36

LZGA-52 #13 RT: 0.17 AV: 1 NL: 1.96E7

T: FTMS + p ESI Full lock ms [150.0000-1100.0000]

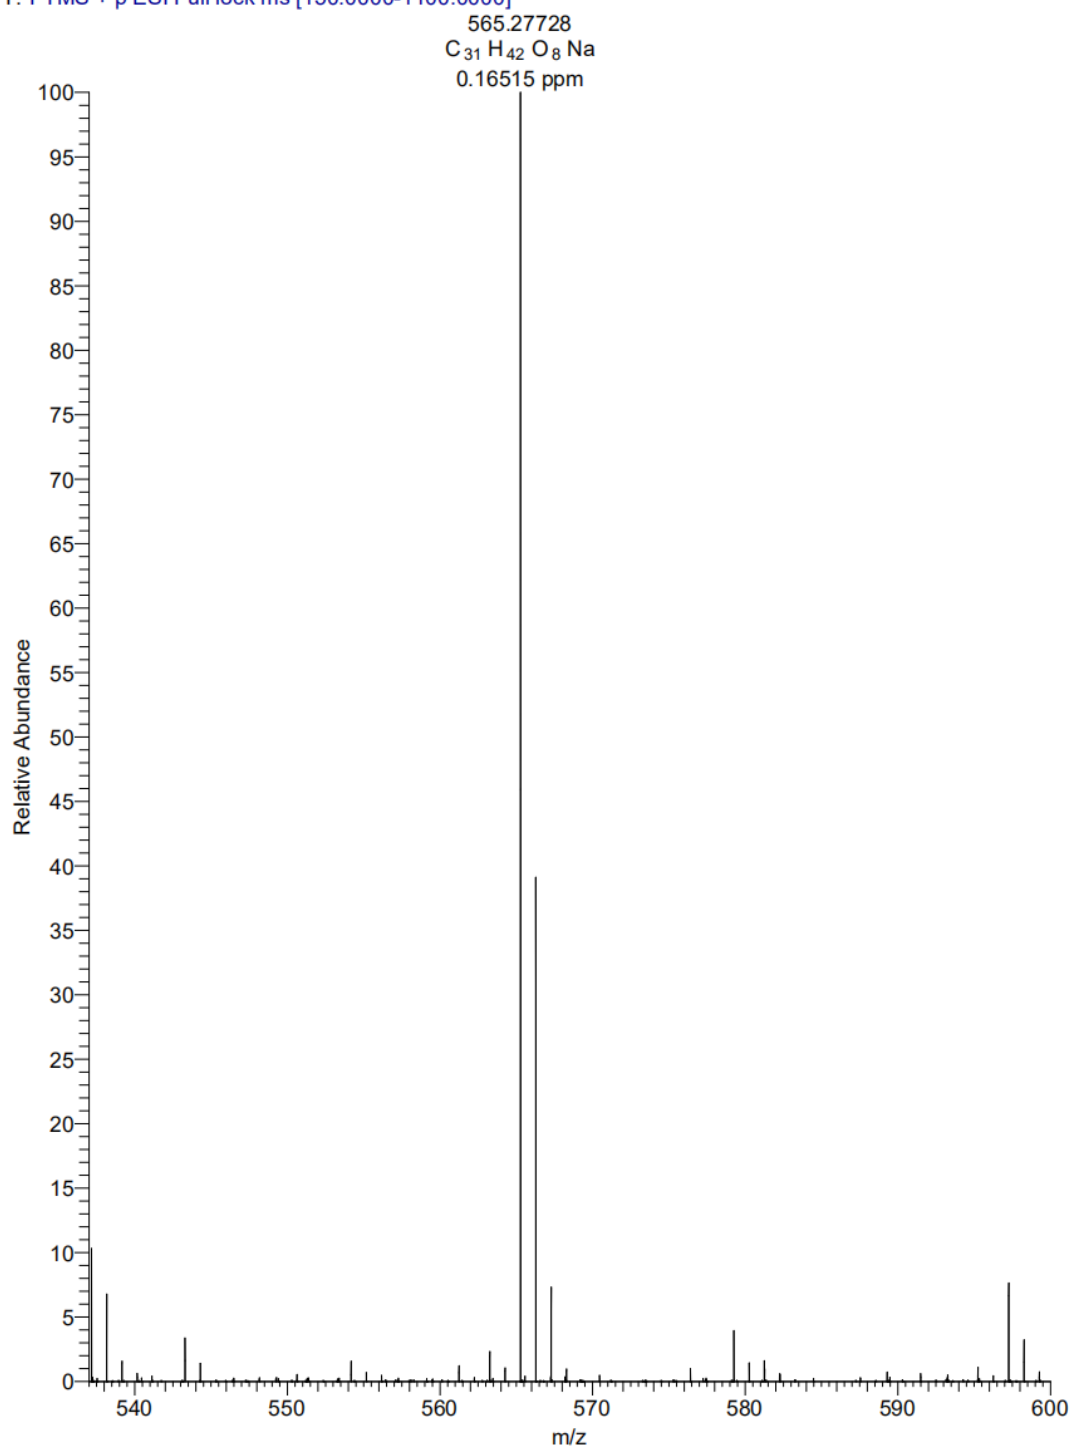

Figure S29.  $^1\text{H}$  NMR spectrum of **5** (600 MHz,  $\text{CDCl}_3$ ).

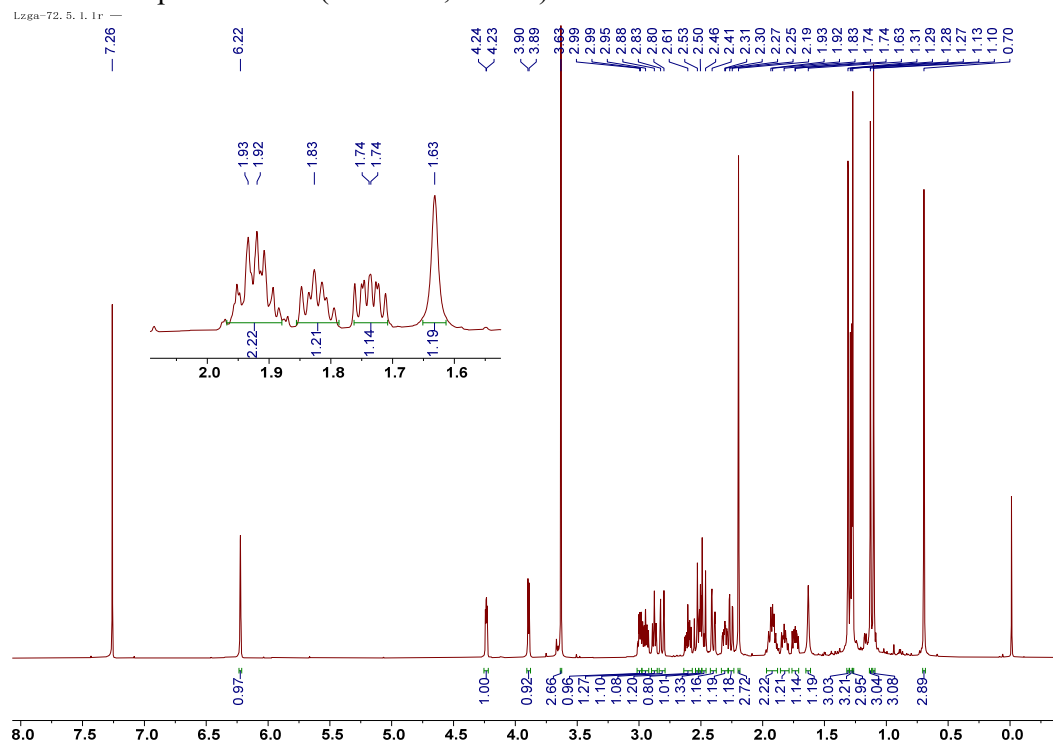

Figure S30.  $^{13}\text{C}$  and DEPT NMR spectra of **5** (150 MHz,  $\text{CDCl}_3$ ).

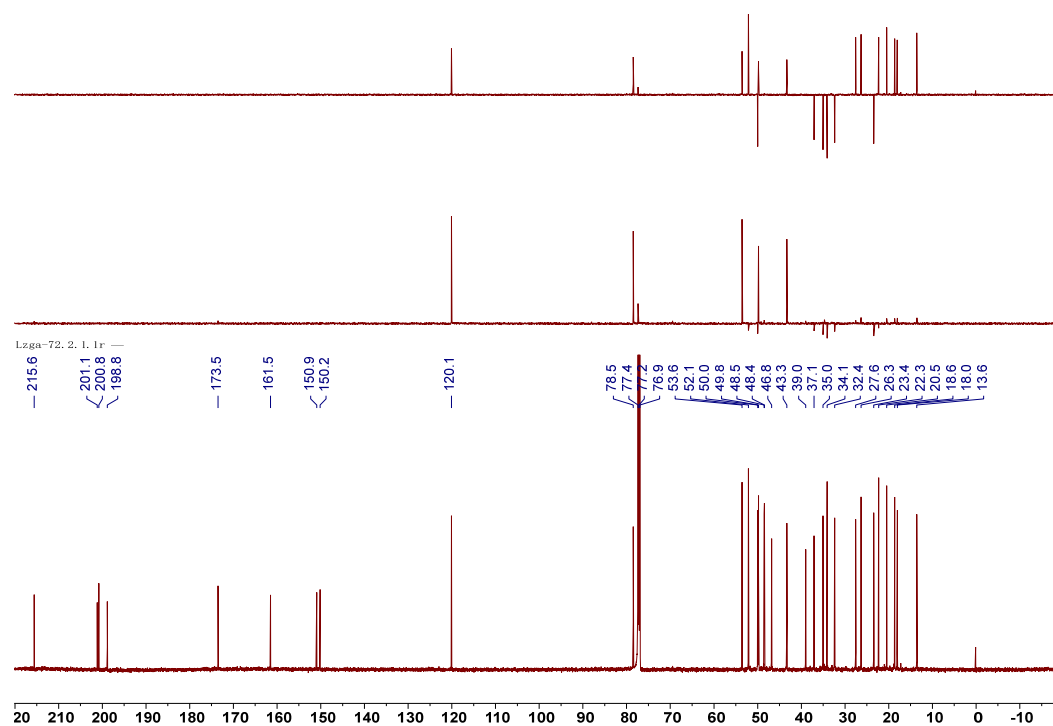

Figure S31. HSQC spectrum of **5**.

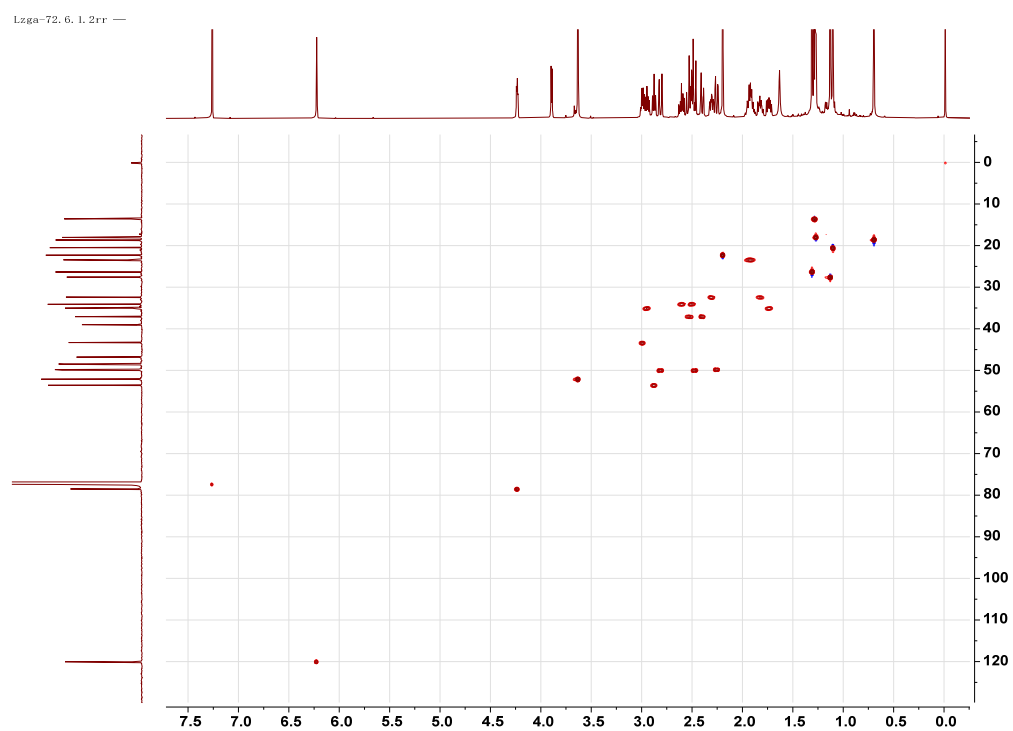

Figure S32. HMBC spectrum of **5**.

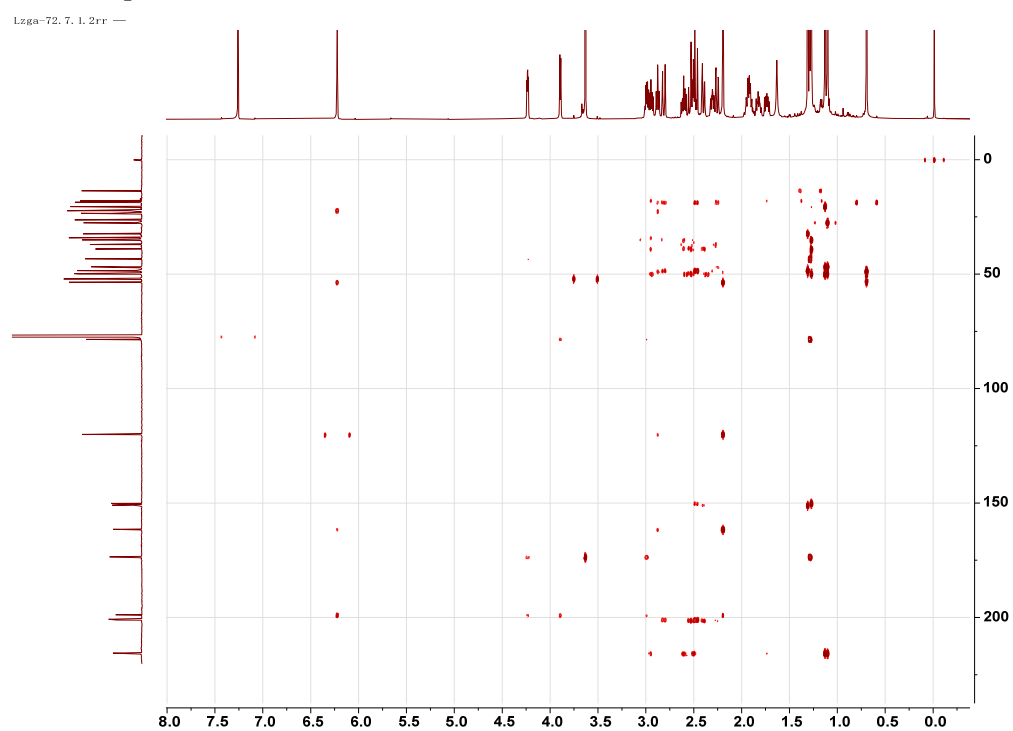

Figure S33.  $^1\text{H}$ - $^1\text{H}$  COSY spectrum of **5**.

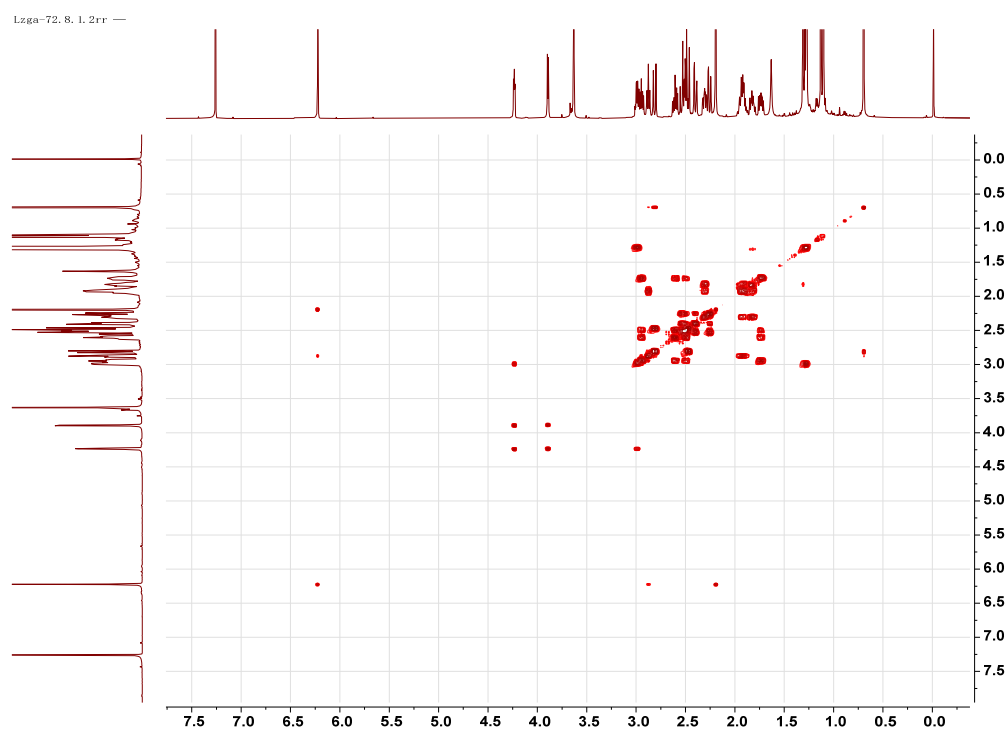

Figure S34. ROESY spectrum of **5**.

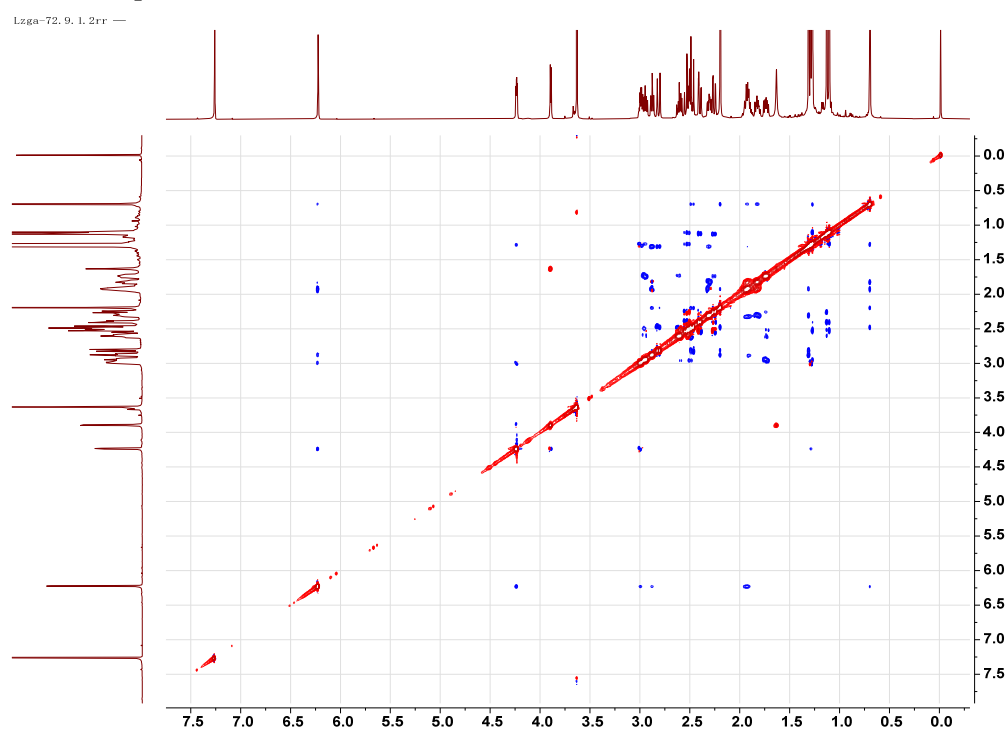

Figure S35. HRESIMS of **5**.

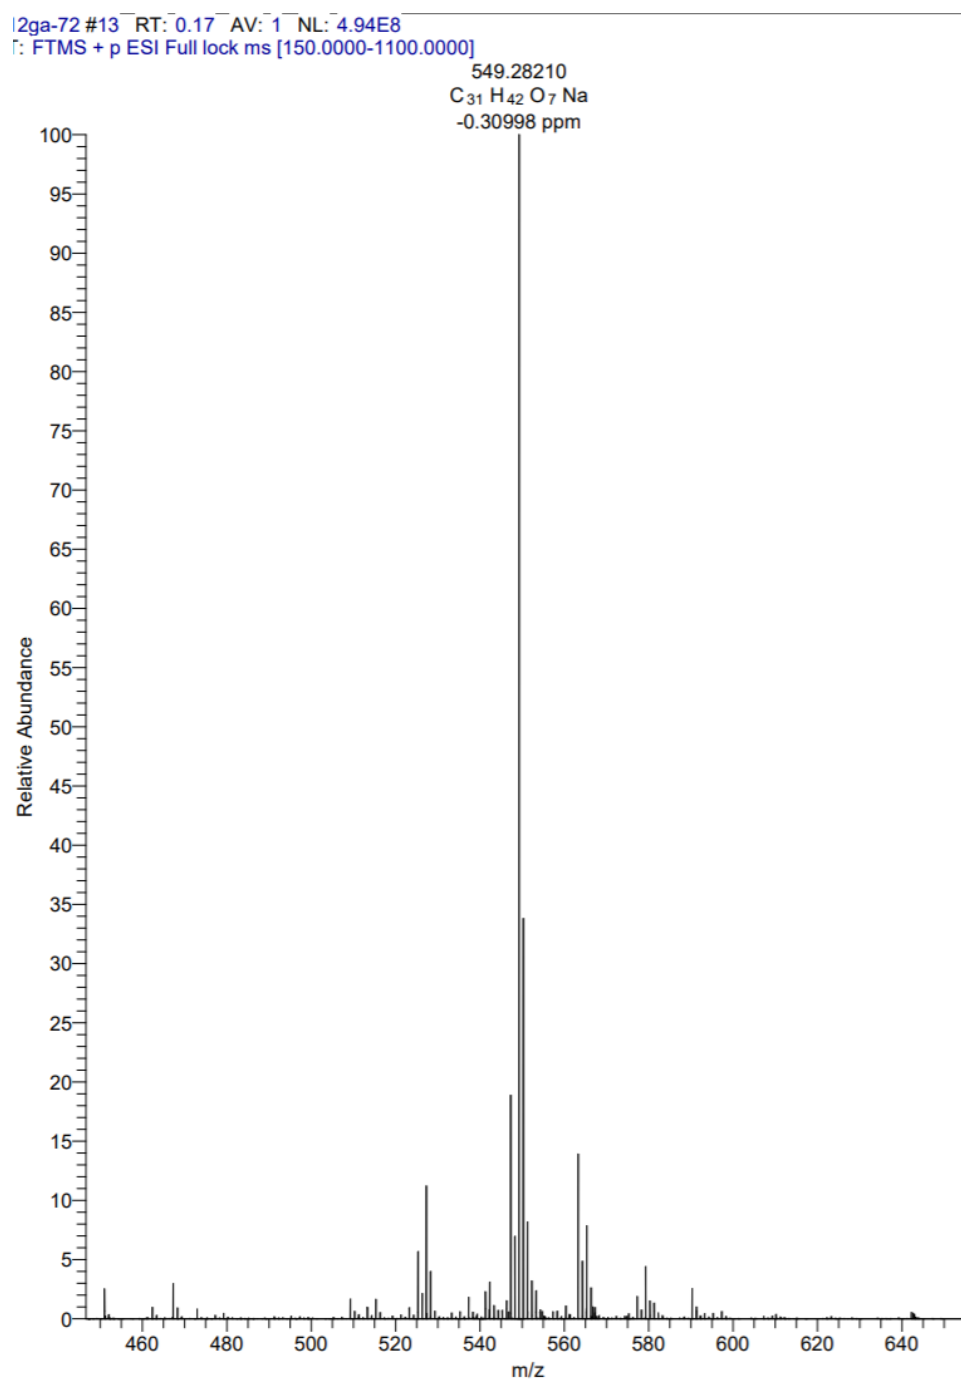



Figure S36.  $^1\text{H}$  NMR spectrum of **6** (600 MHz,  $\text{CDCl}_3$ ).

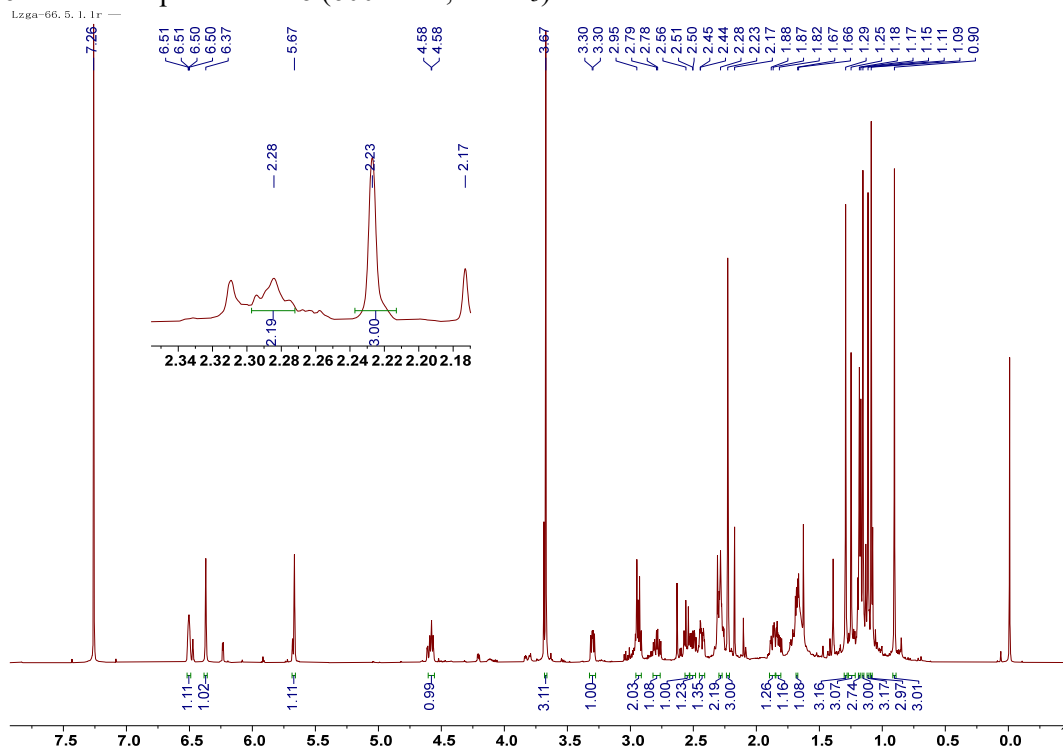

Figure S37.  $^{13}\text{C}$  and DEPT NMR spectra of **6** (150 MHz,  $\text{CDCl}_3$ ).

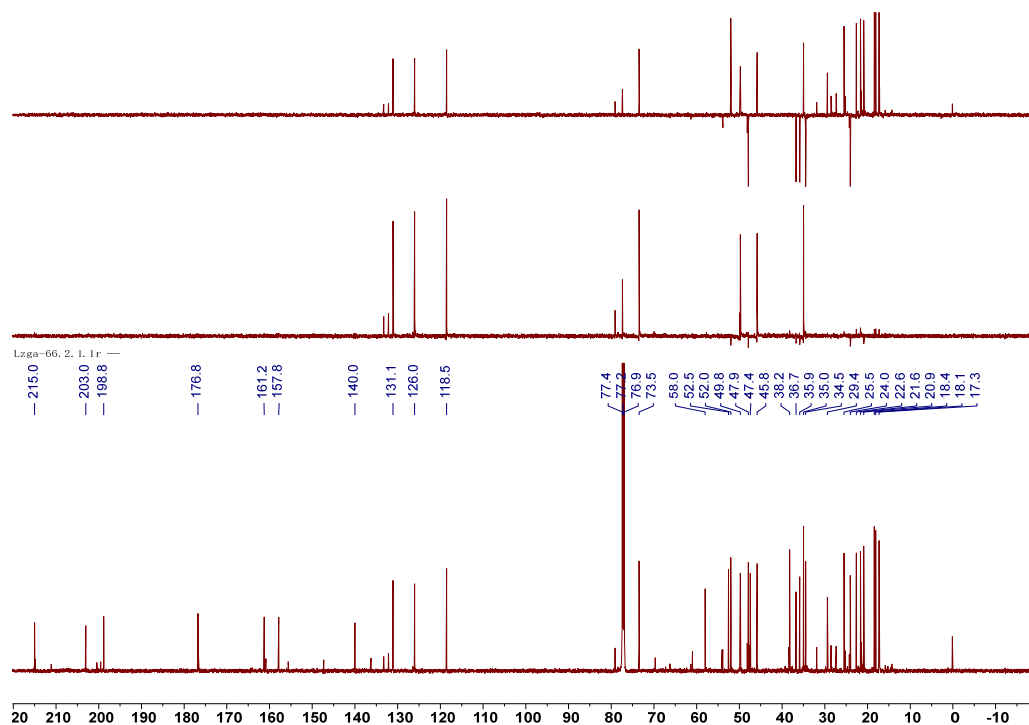

Figure S38. HSQC spectrum of **6**.

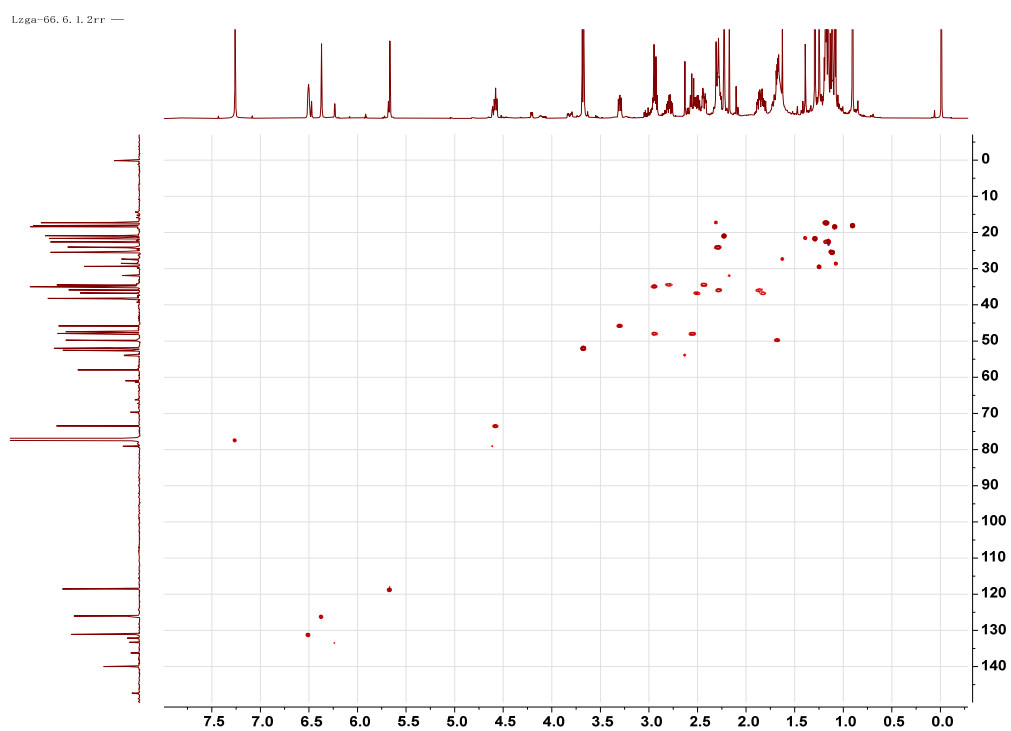

Figure S39. HMBC spectrum of **6**.

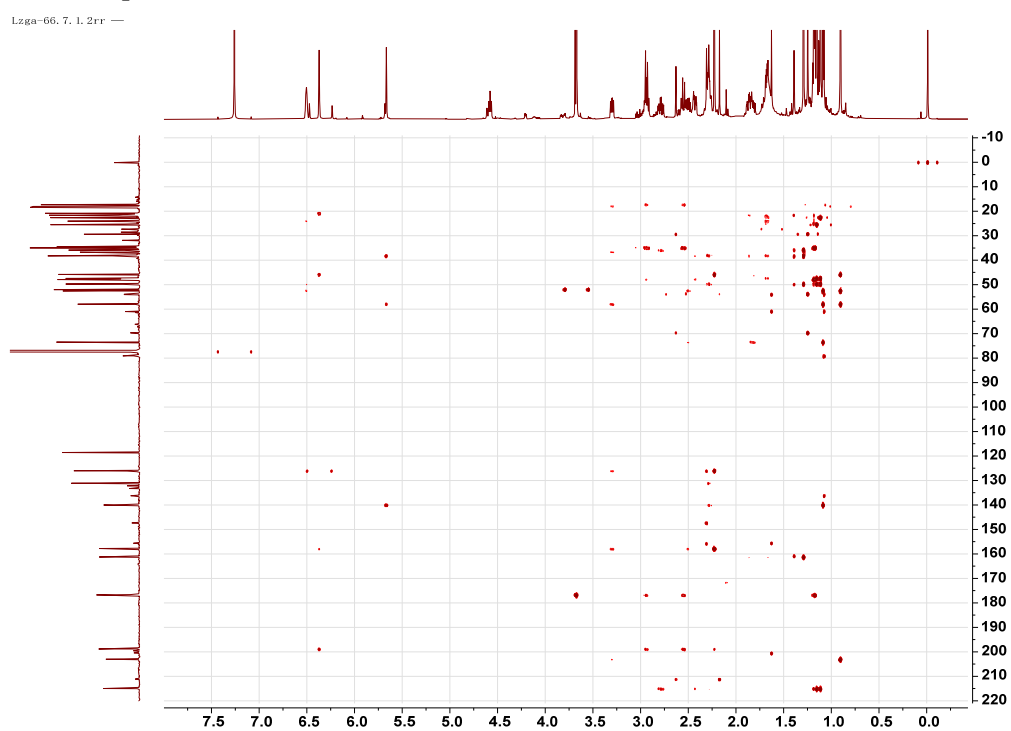

Figure S40.  $^1\text{H}$ - $^1\text{H}$  COSY spectrum of **6**.

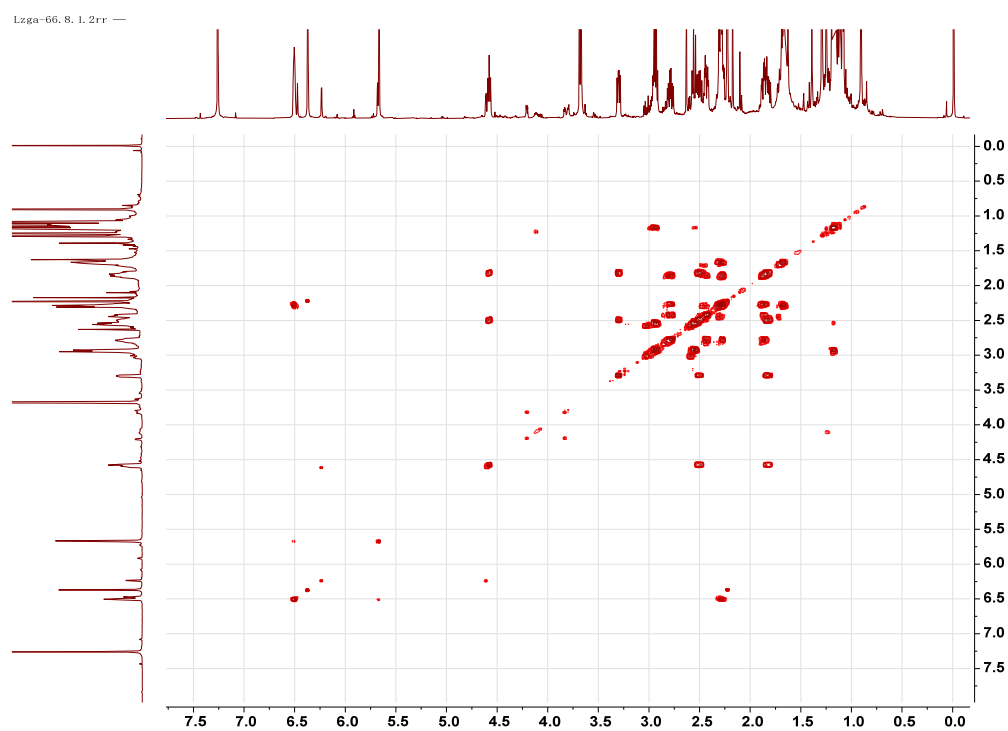

Figure S41. ROESY spectrum of **6**.

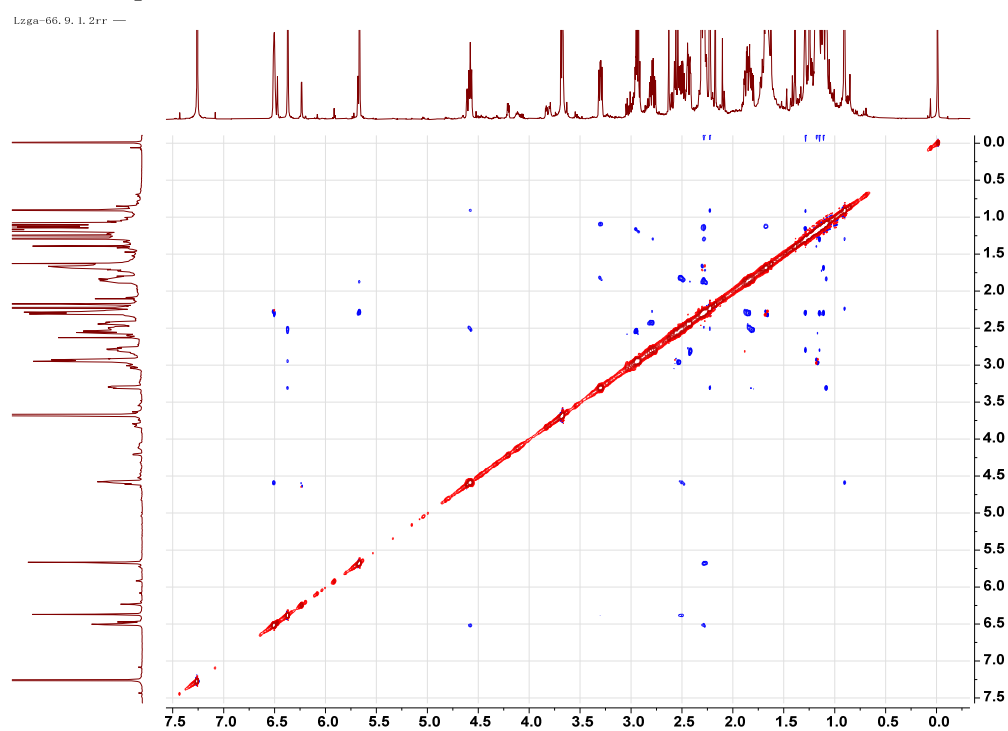

Figure S42. HRESIMS of **6**.

D:\spectrum\lzga\Lzga-66\LZGA-66

2020/11/20 17:53:03

LZGA-66 #11 RT: 0.14 AV: 1 NL: 1.04E9

T: FTMS + p ESI Full lock ms [150.0000-1100.0000]

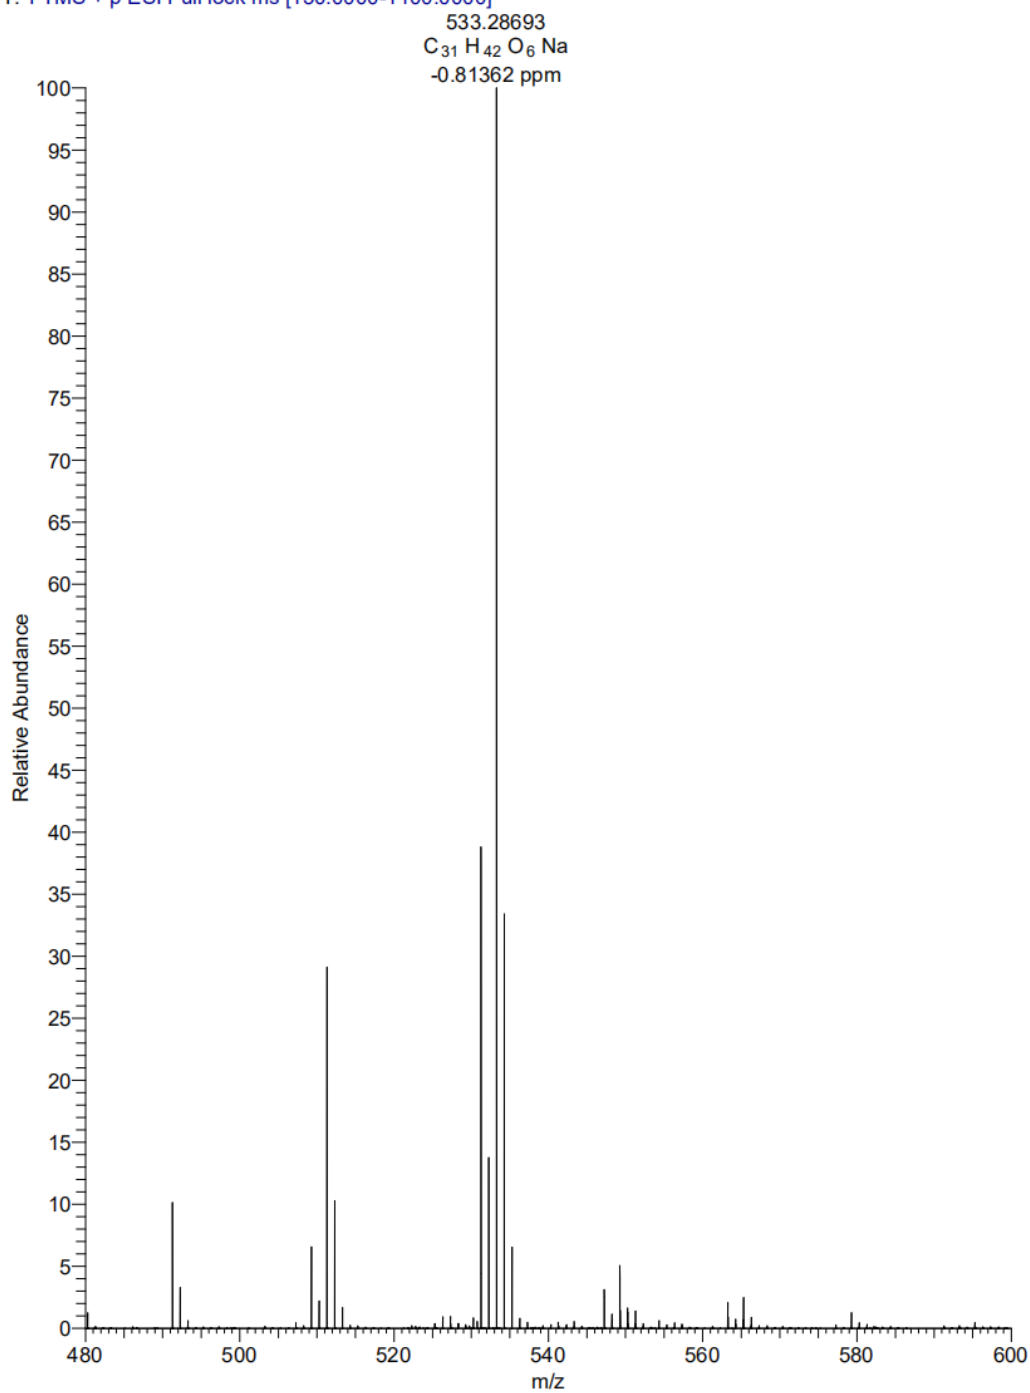

Figure S43.  $^1\text{H}$  NMR spectrum of **7** (800 MHz,  $\text{CDCl}_3$ ).

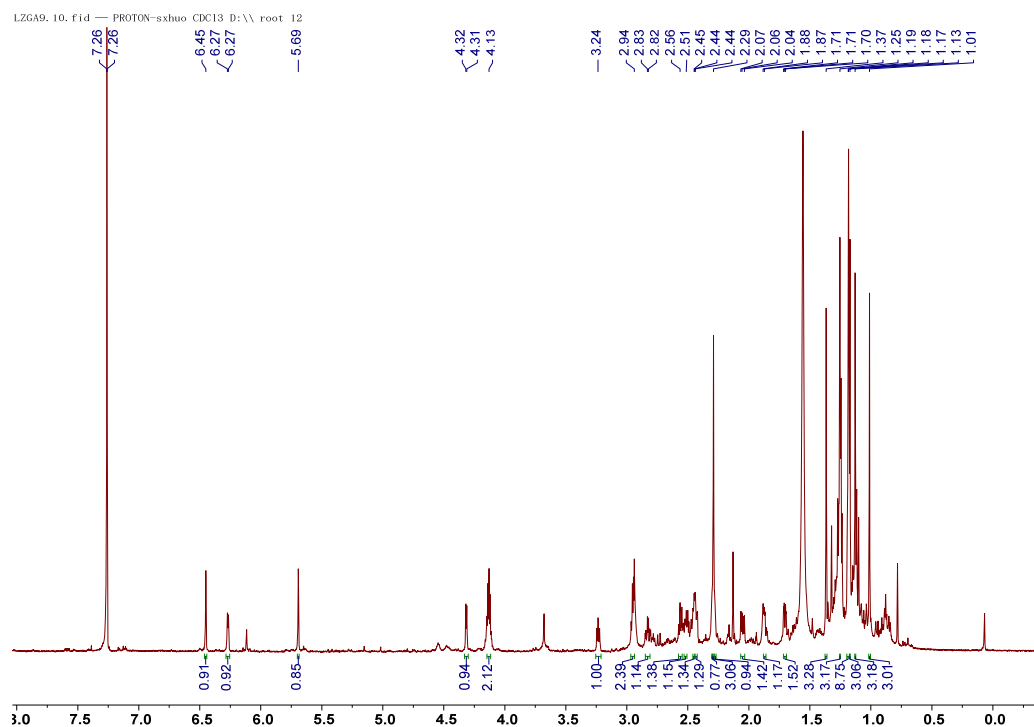

Figure S44.  $^{13}\text{C}$  NMR spectra of **7** (200 MHz,  $\text{CDCl}_3$ ).

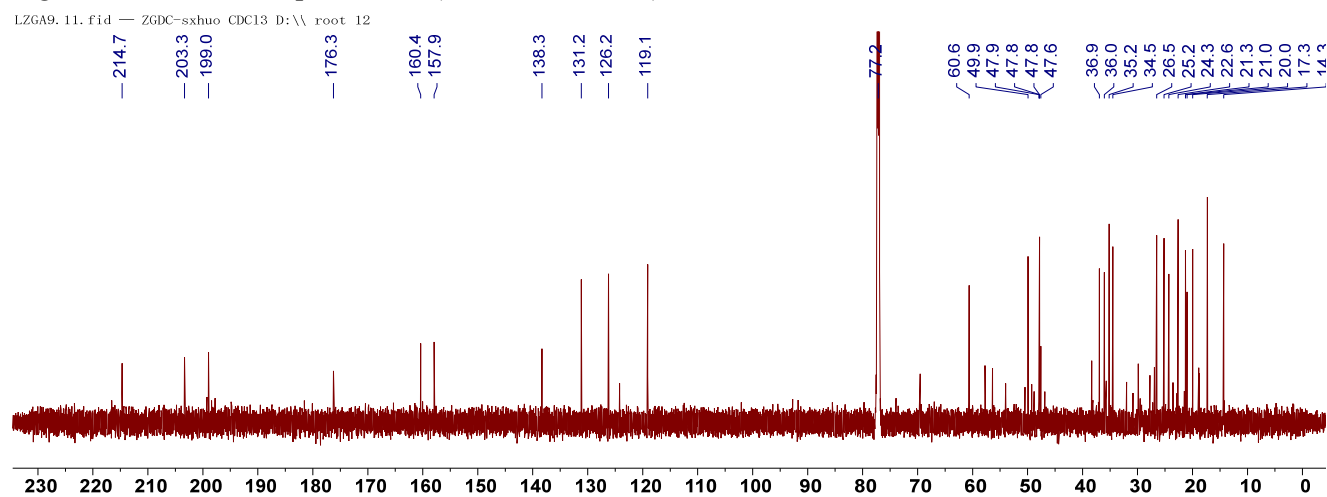

Figure S45. HSQC spectrum of 7.

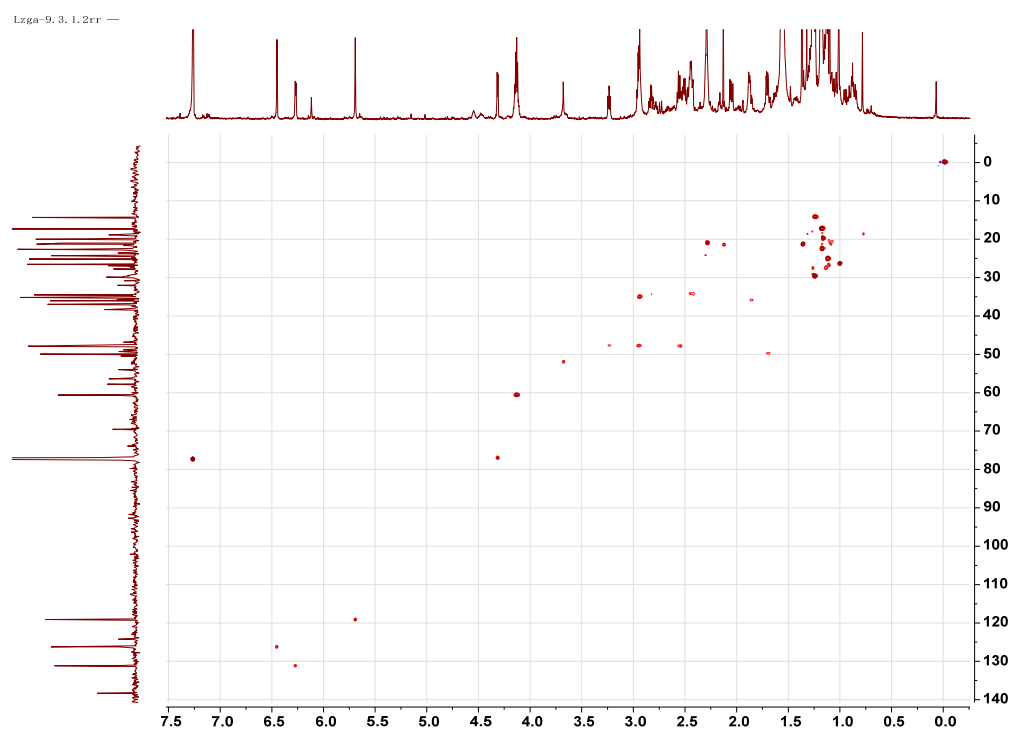

Figure S46. HMBC spectrum of 7.

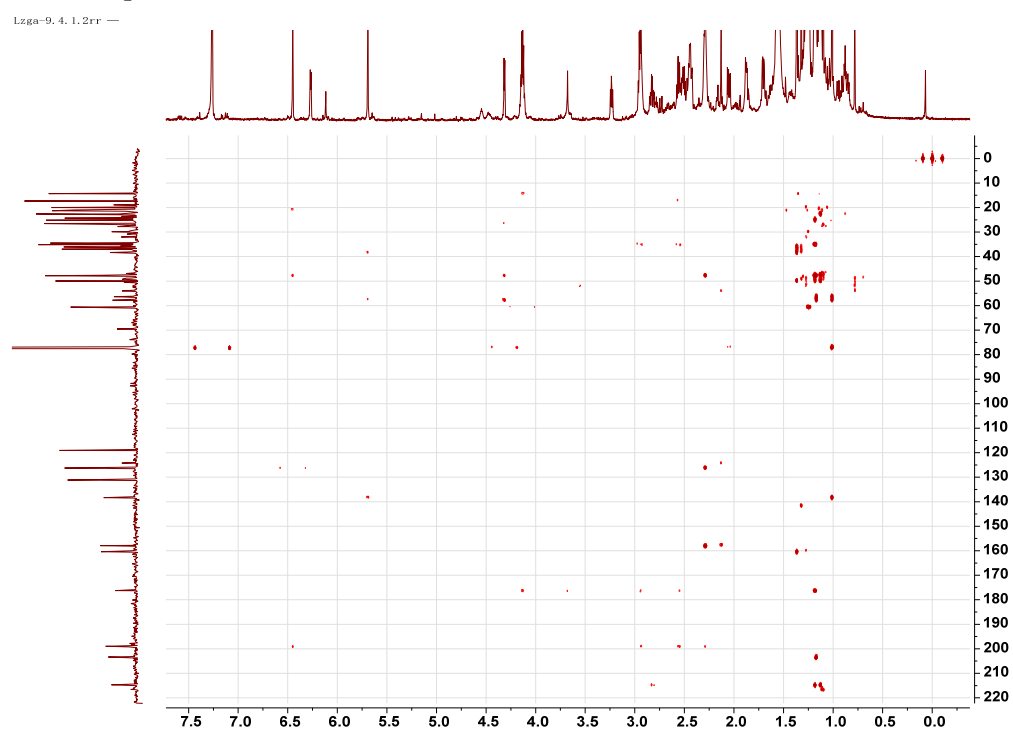

Figure S47.  $^1\text{H}$ - $^1\text{H}$  COSY spectrum of 7.

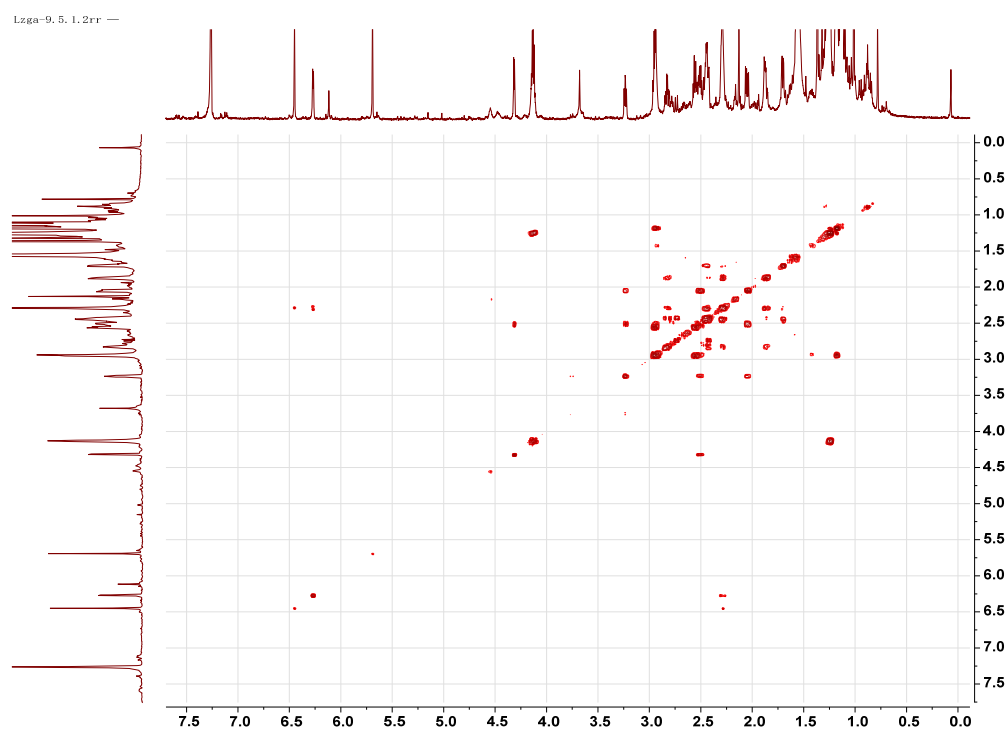

Figure S48. ROESY spectrum of 7.

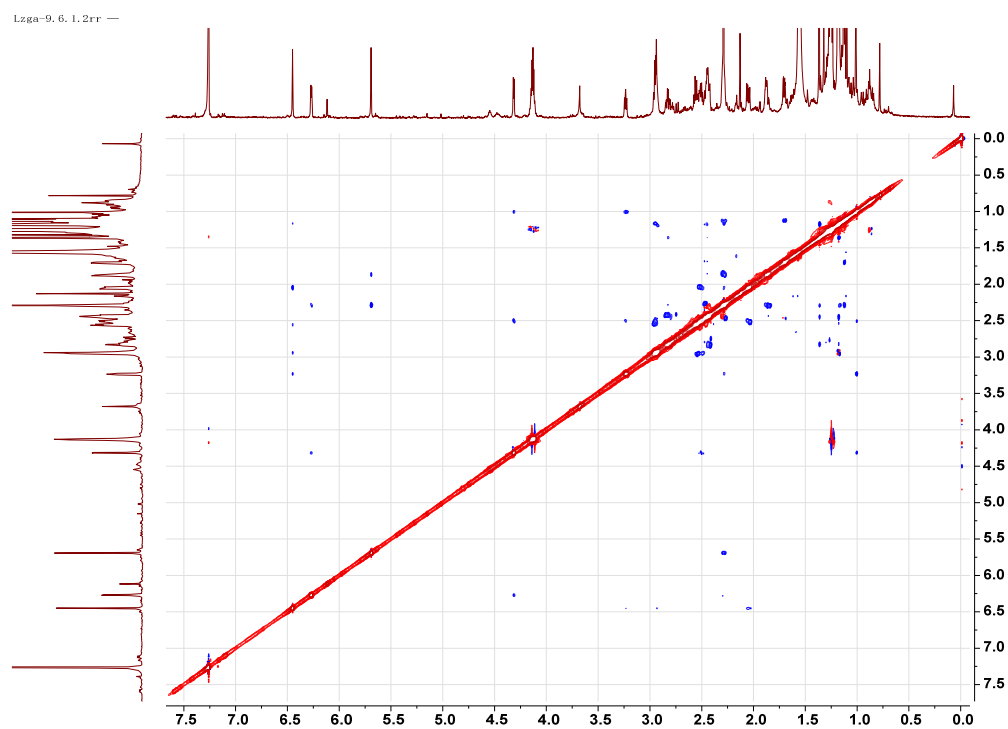

Figure S49. HRESIMS of 7.

D:\spectrum\zga\Lzga-9\LZGA-9

2021/6/18 10:12:25

LZGA-9 #13 RT: 0.17 AV: 1 NL: 5.81E7

T: FTMS + p ESI Full lock ms [150.0000-1100.0000]

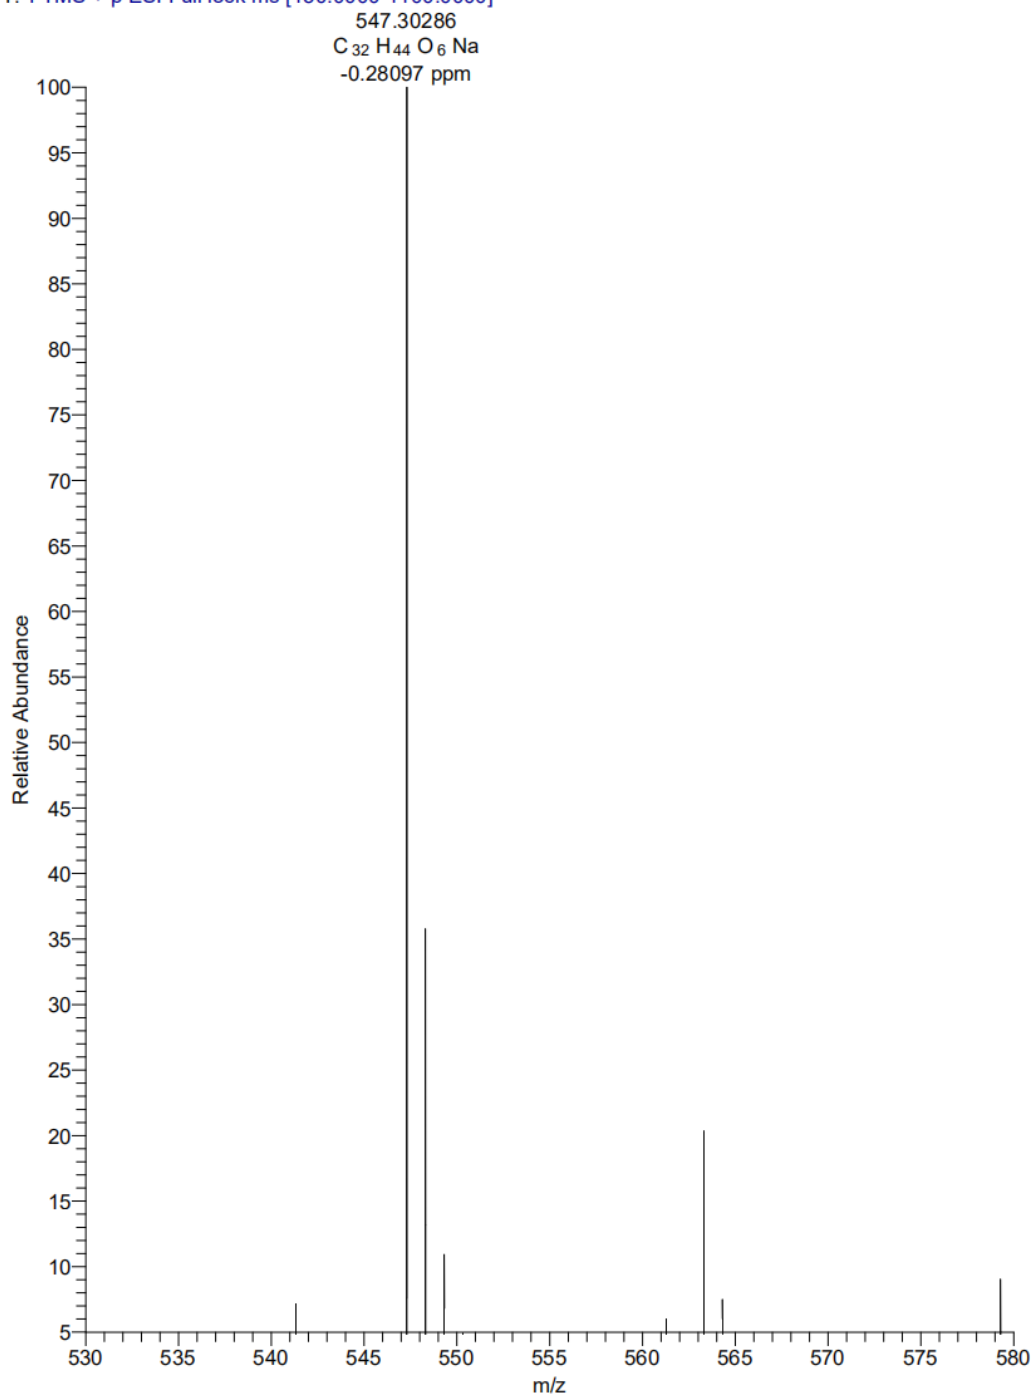



Figure S50.  $^1\text{H}$  NMR spectrum of **8** (600 MHz,  $\text{CDCl}_3$ ).

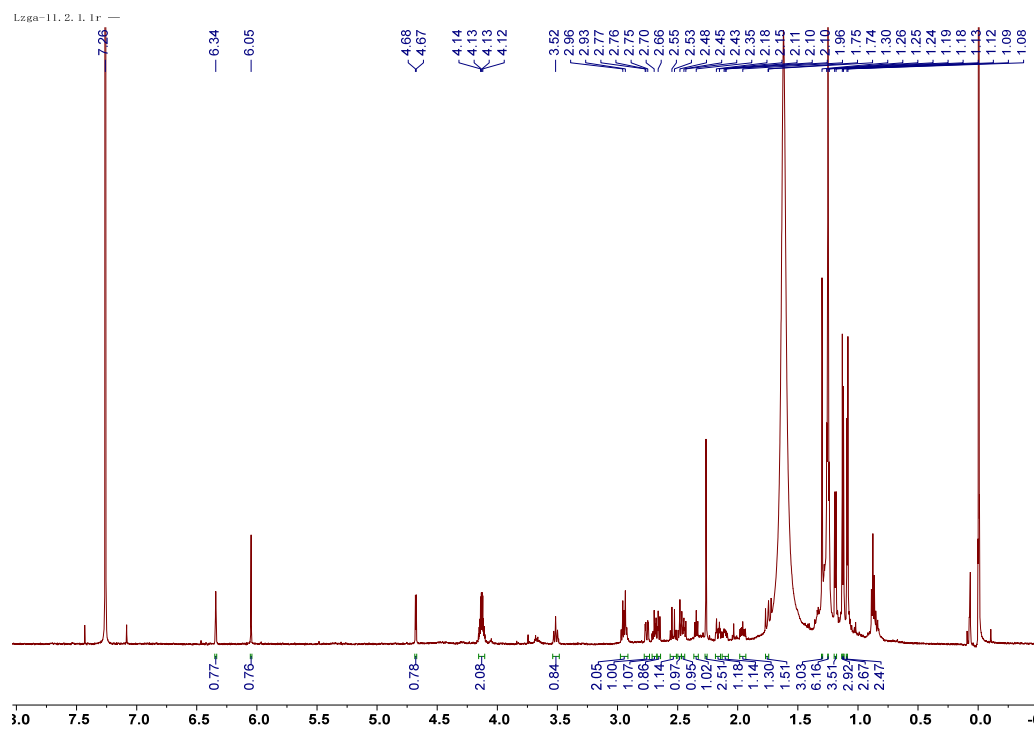

Figure S51.  $^{13}\text{C}$  NMR spectra of **8** (150 MHz,  $\text{CDCl}_3$ ).

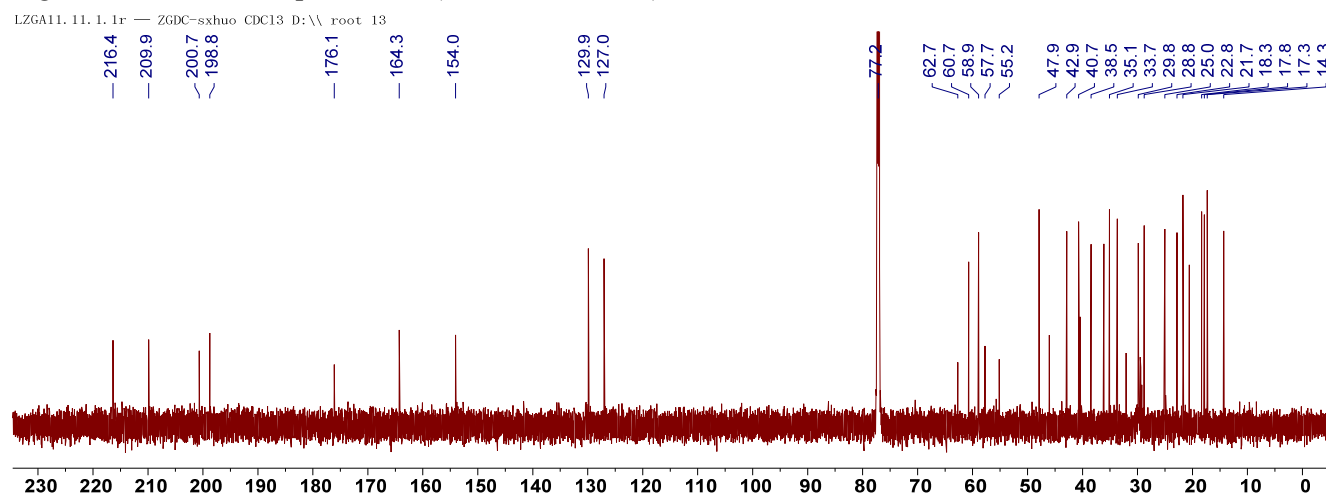

Figure S52. HSQC spectrum of **8**.

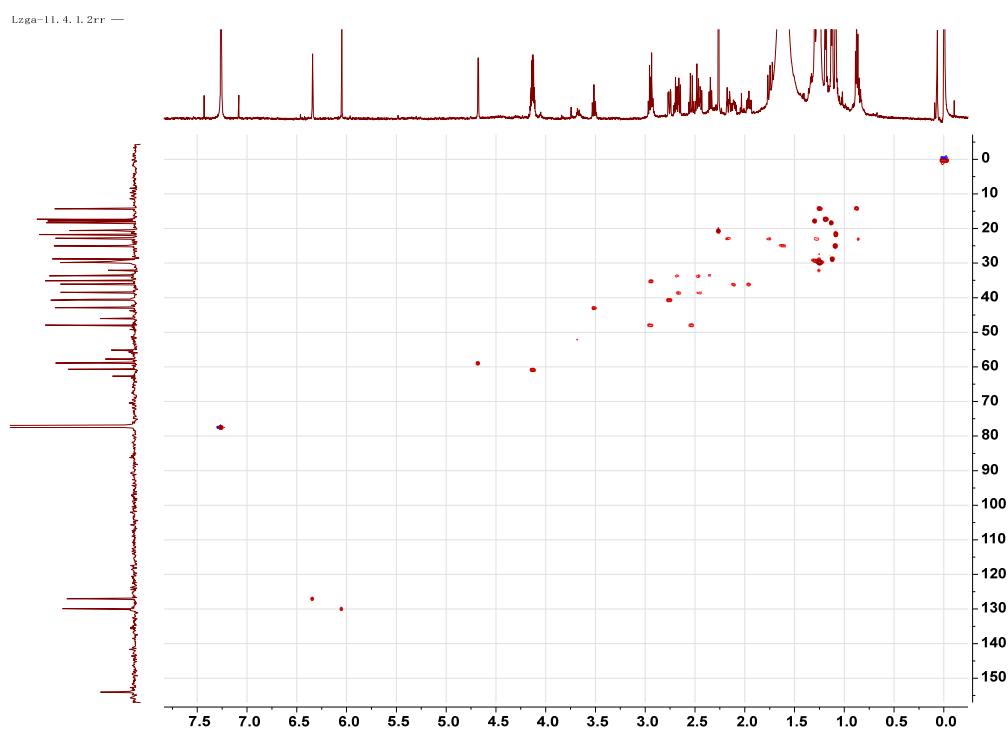

Figure S53. HMBC spectrum of **8**.

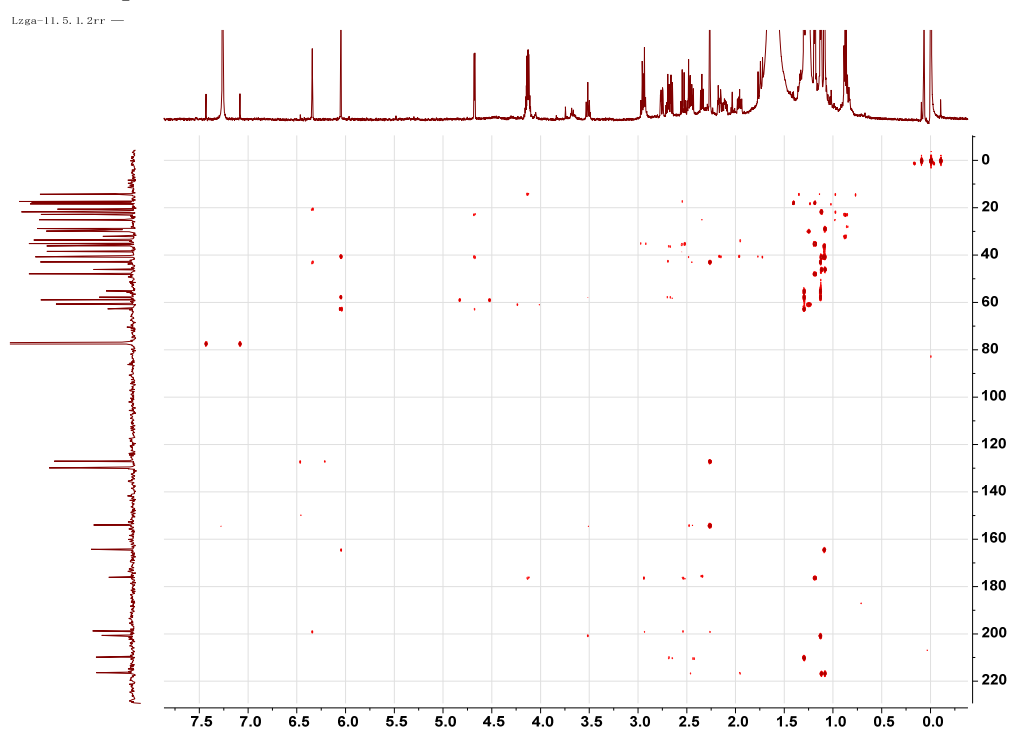

Figure S54.  $^1\text{H}$ - $^1\text{H}$  COSY spectrum of **8**.

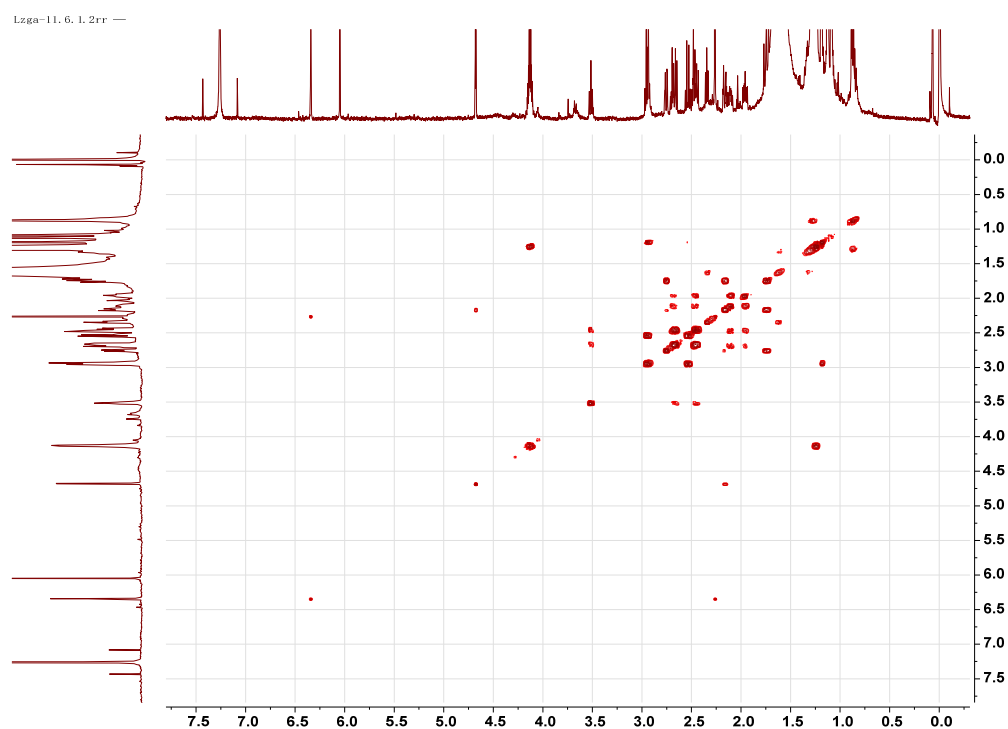

Figure S55. ROESY spectrum of **8**.

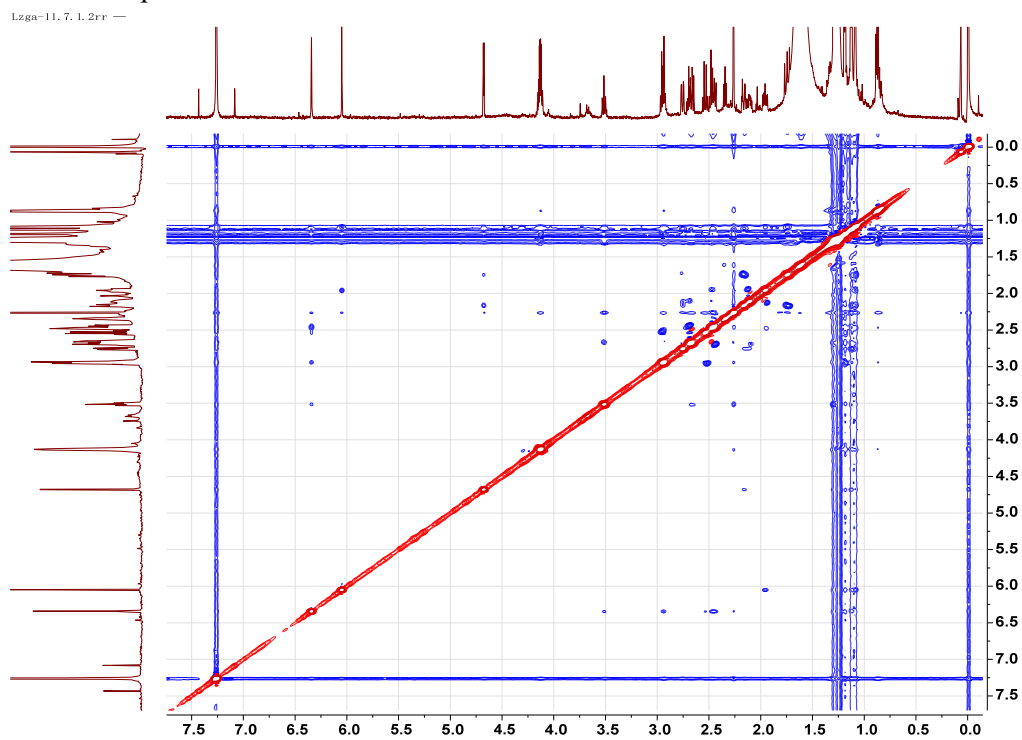

Figure S56. HRESIMS of **8**.

D:\spectrum\zga\7Lzga-11\LZGA-11

2021/6/18 10:09:02

LZGA-11 #13 RT: 0.17 AV: 1 NL: 3.88E7

T: FTMS + p ESI Full lock ms [150.0000-1100.0000]

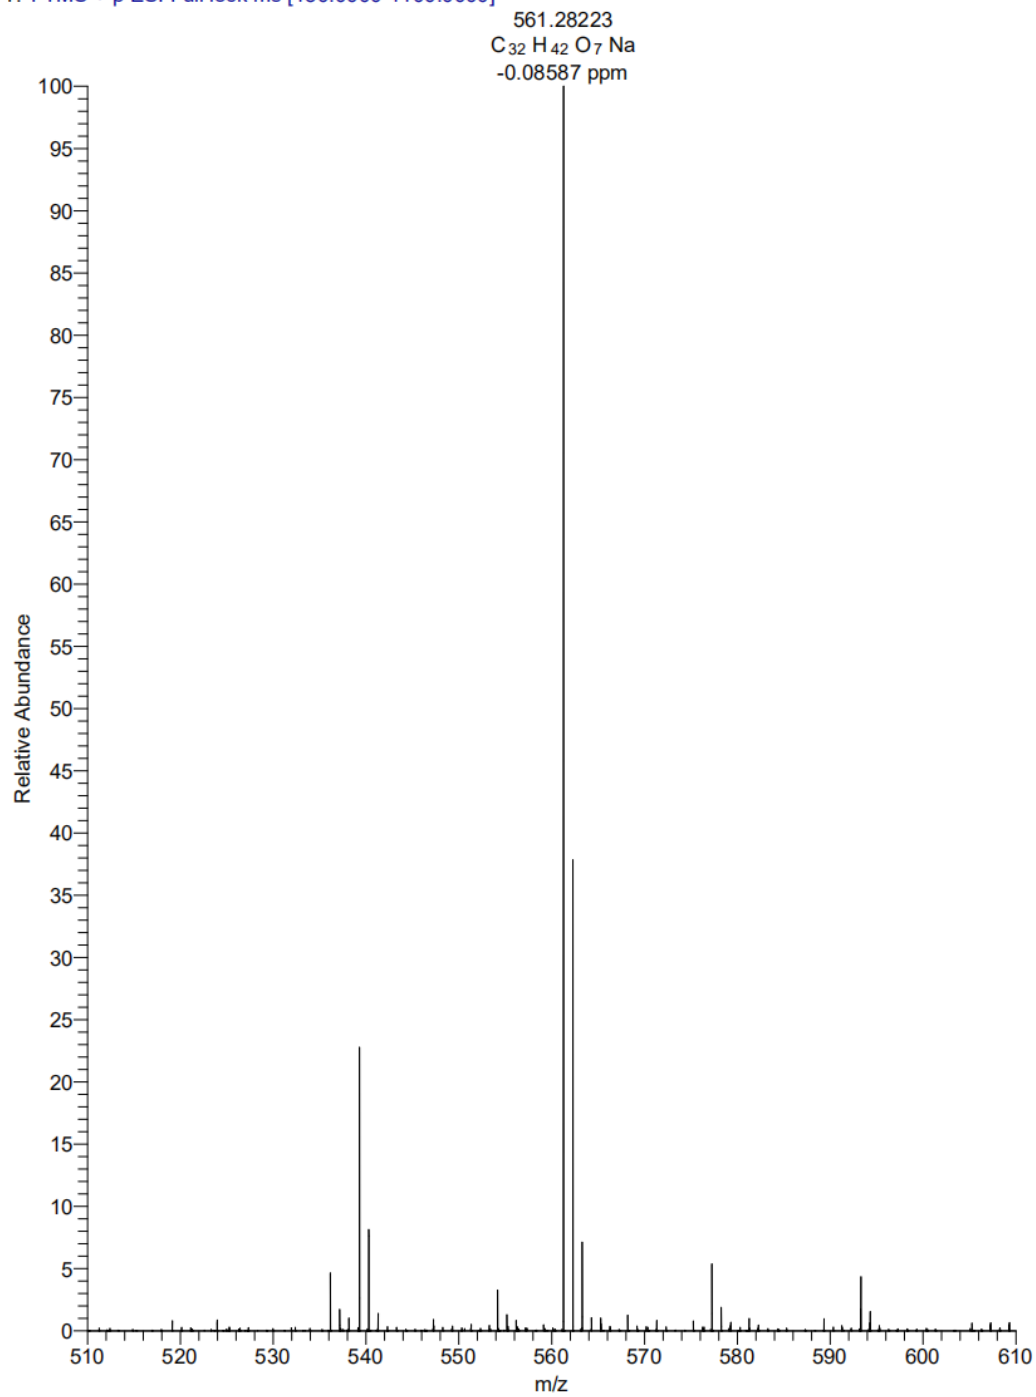

Figure S57.  $^1\text{H}$  NMR spectrum of **9** (600 MHz,  $\text{CDCl}_3$ ).

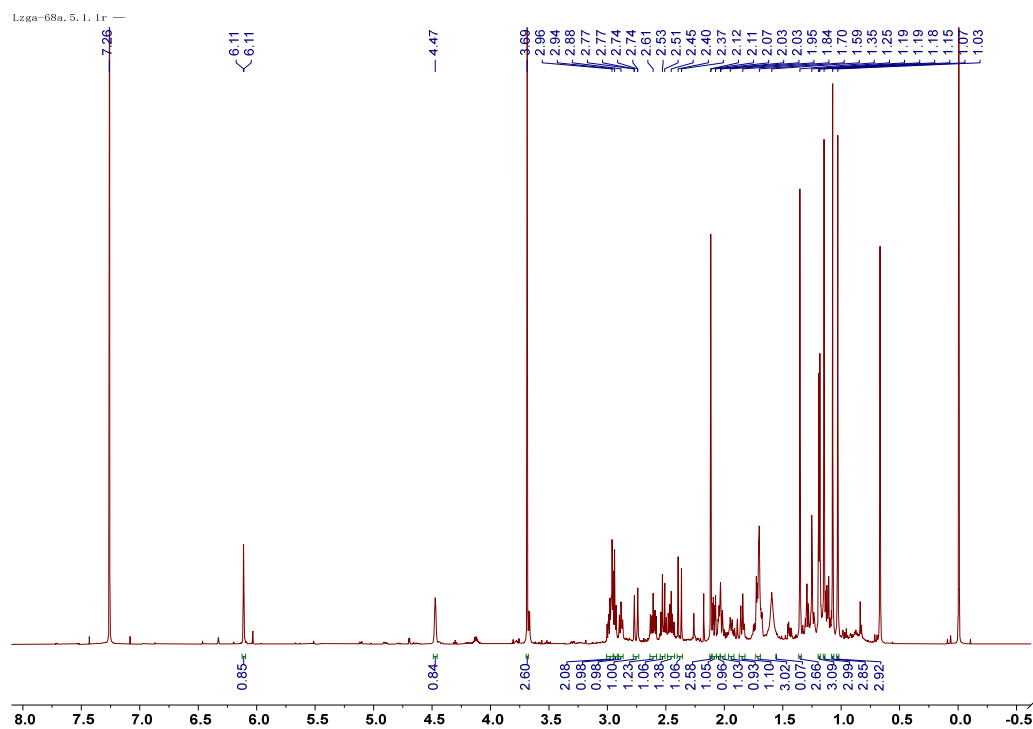

Figure S58.  $^{13}\text{C}$  and DEPT NMR spectra of **9** (150 MHz,  $\text{CDCl}_3$ ).

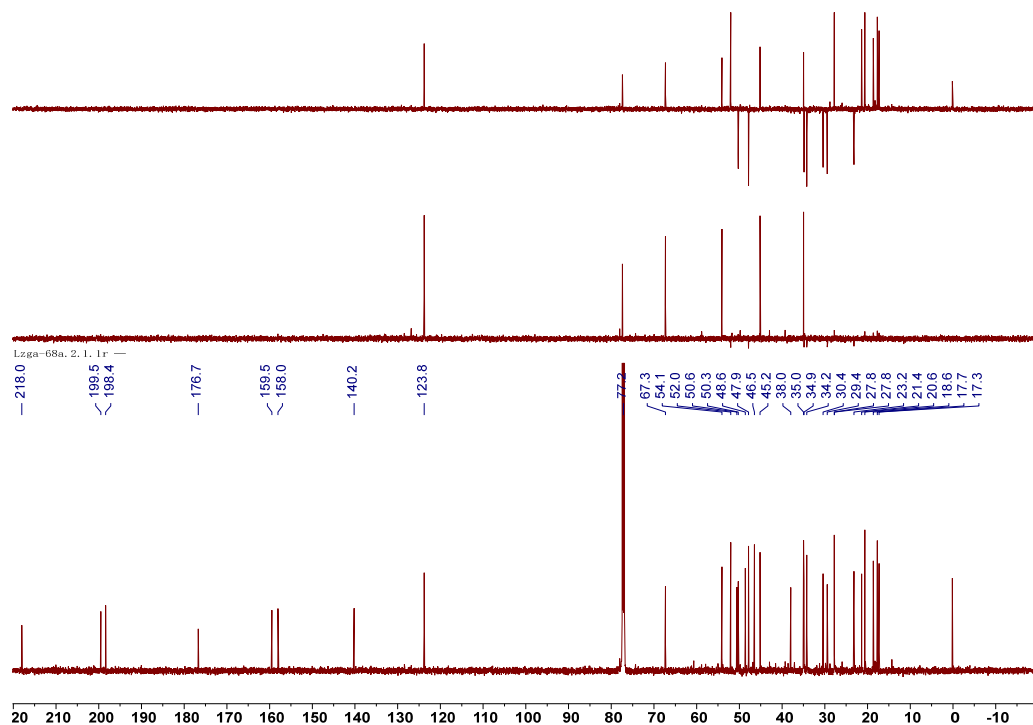

Figure S59. HSQC spectrum of **9**.

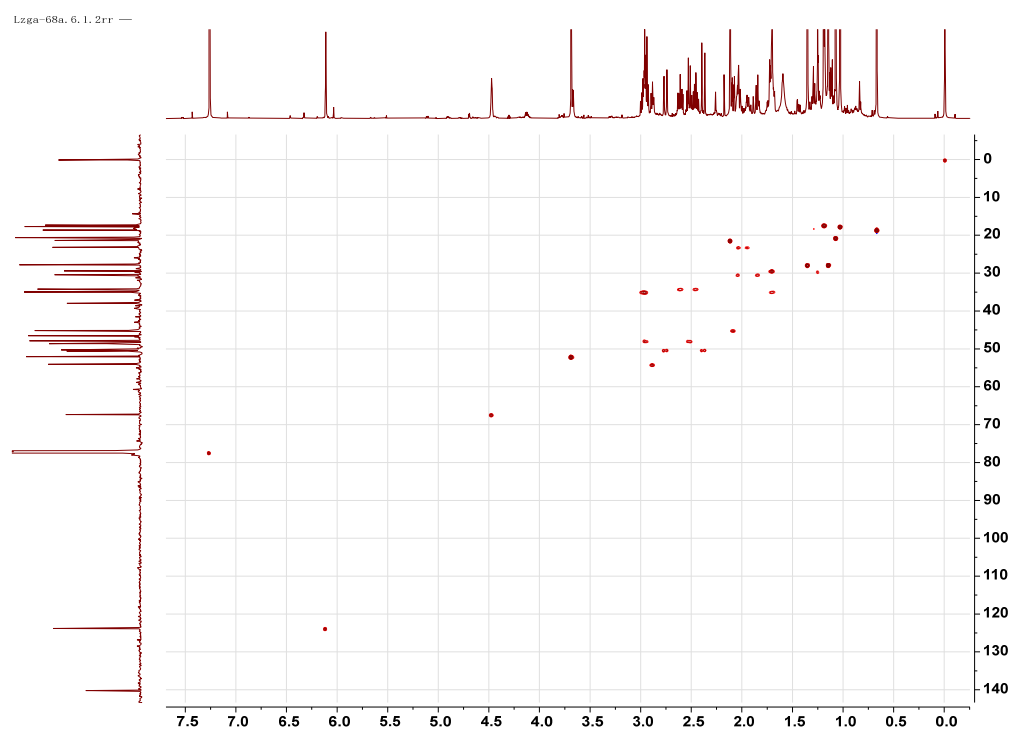

Figure S60. HMBC spectrum of **9**.

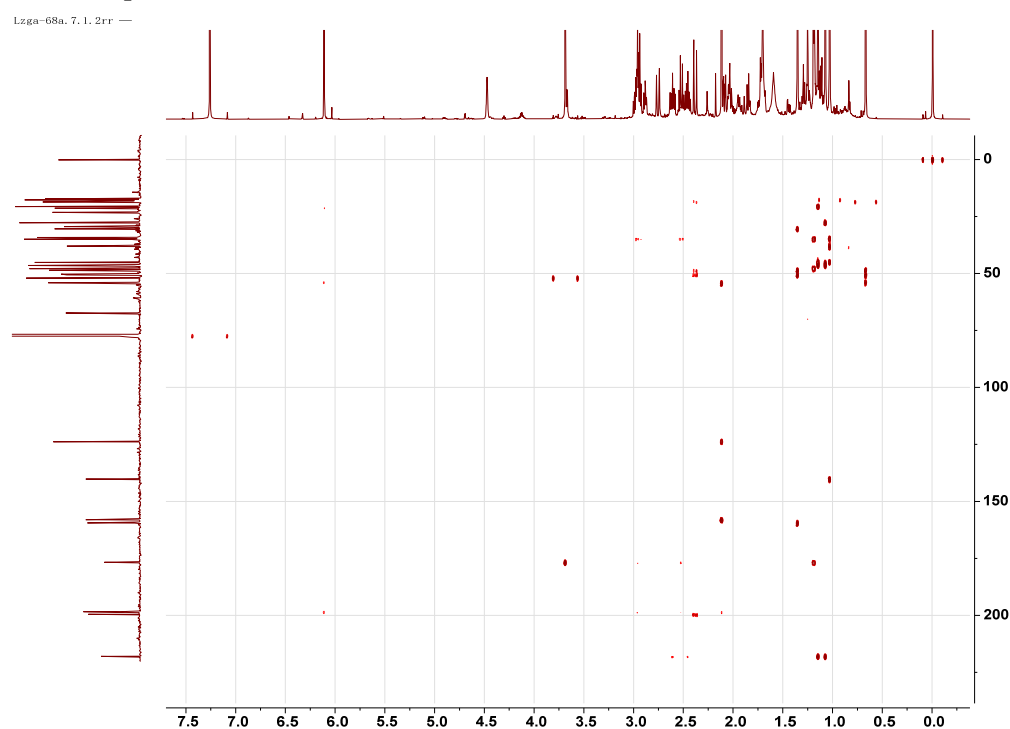

Figure S61.  $^1\text{H}$ - $^1\text{H}$  COSY spectrum of **9**.

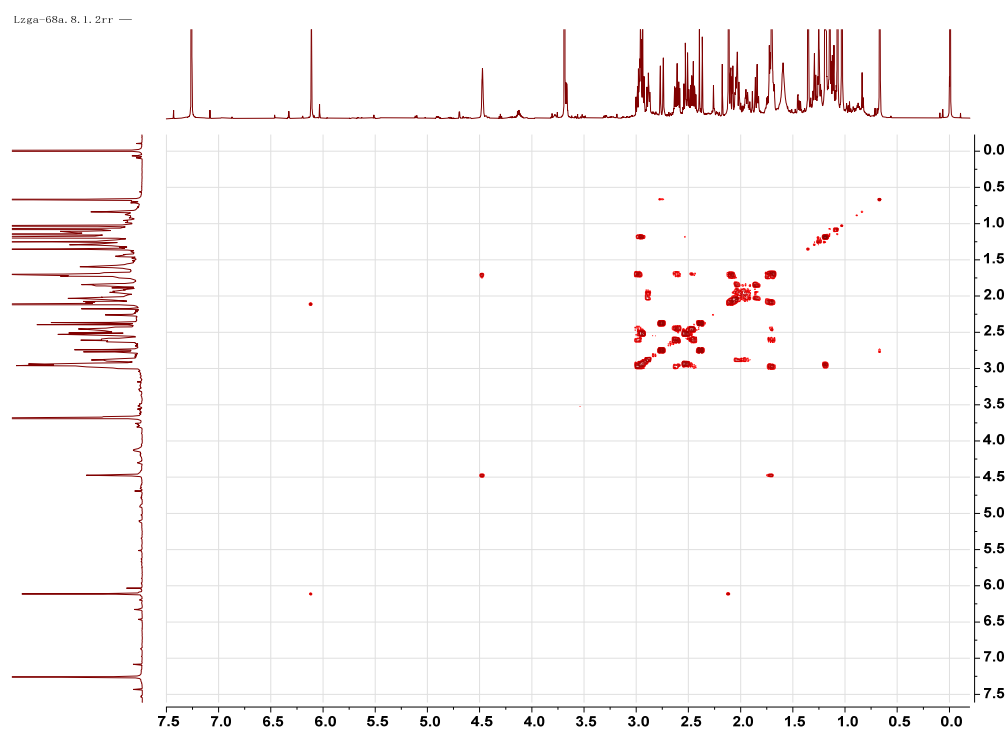

Figure S62. ROESY spectrum of **9**.

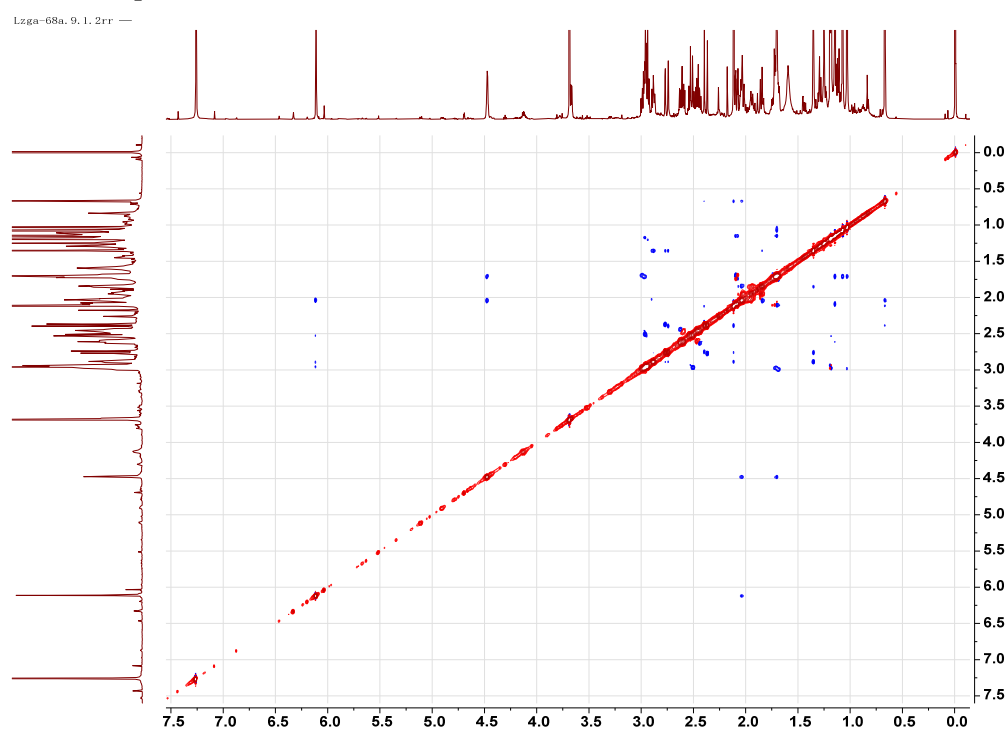

Figure S63. HRESIMS of 9.

lzga-68a #13 RT: 0.17 AV: 1 NL: 1.11E9

T: FTMS + p ESI Full lock ms [200.0000-1000.0000]

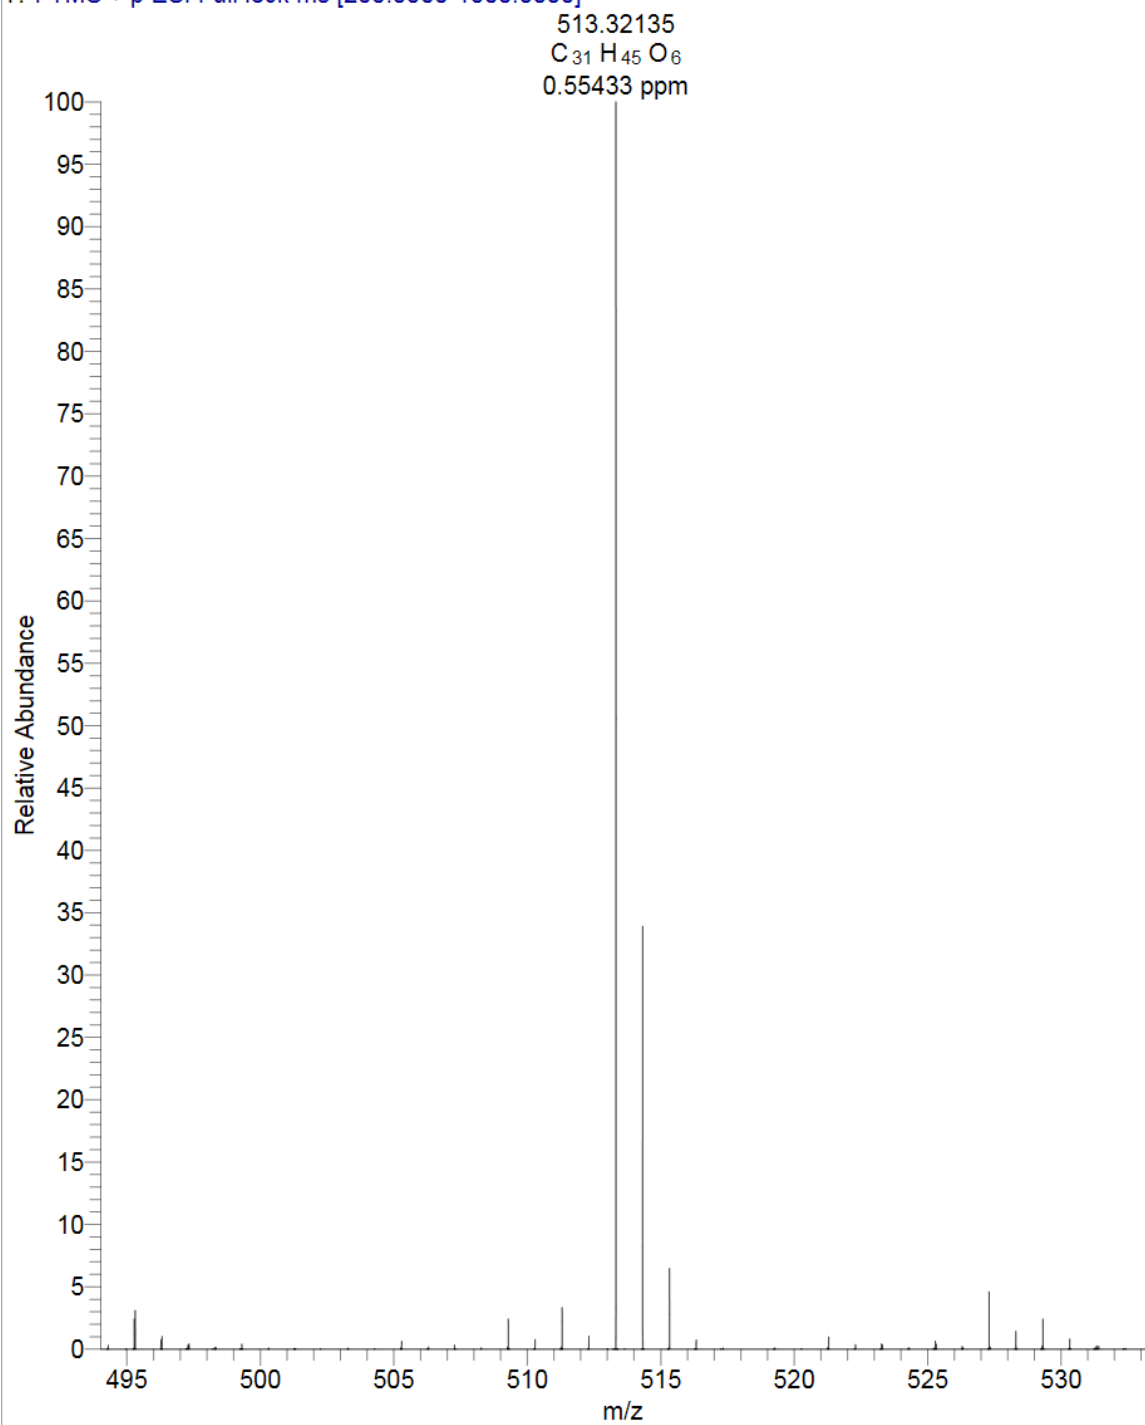



Figure S64.  $^1\text{H}$  NMR spectrum of **10** (600 MHz,  $\text{CDCl}_3$ ).

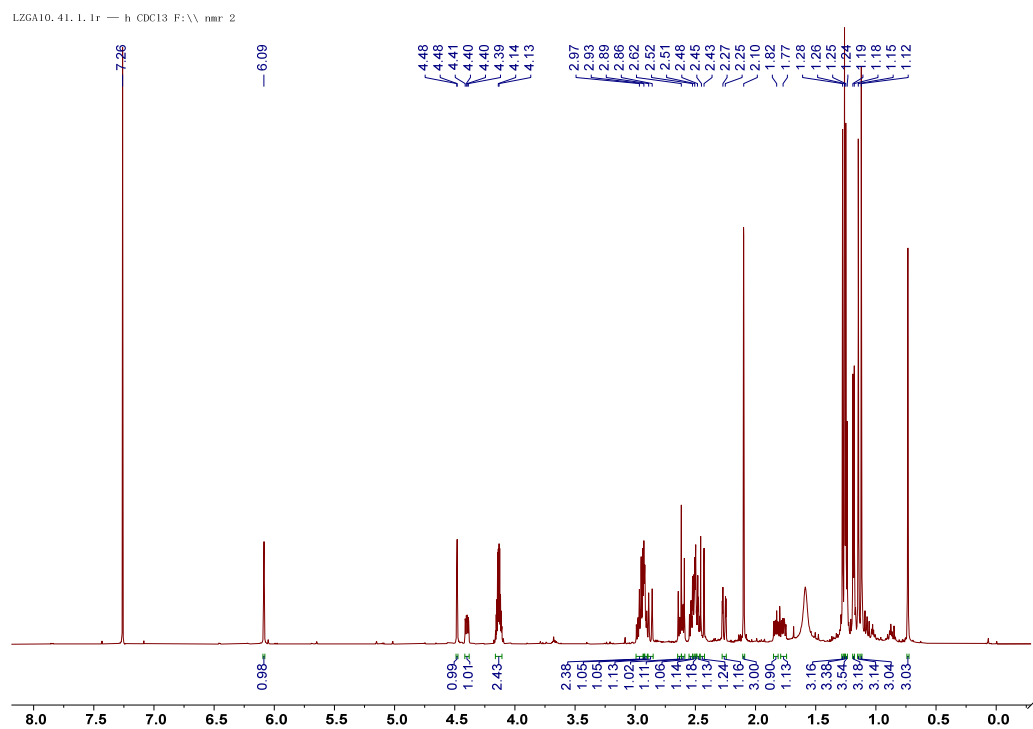

Figure S65.  $^{13}\text{C}$  and DEPT NMR spectra of **10** (150 MHz,  $\text{CDCl}_3$ ).

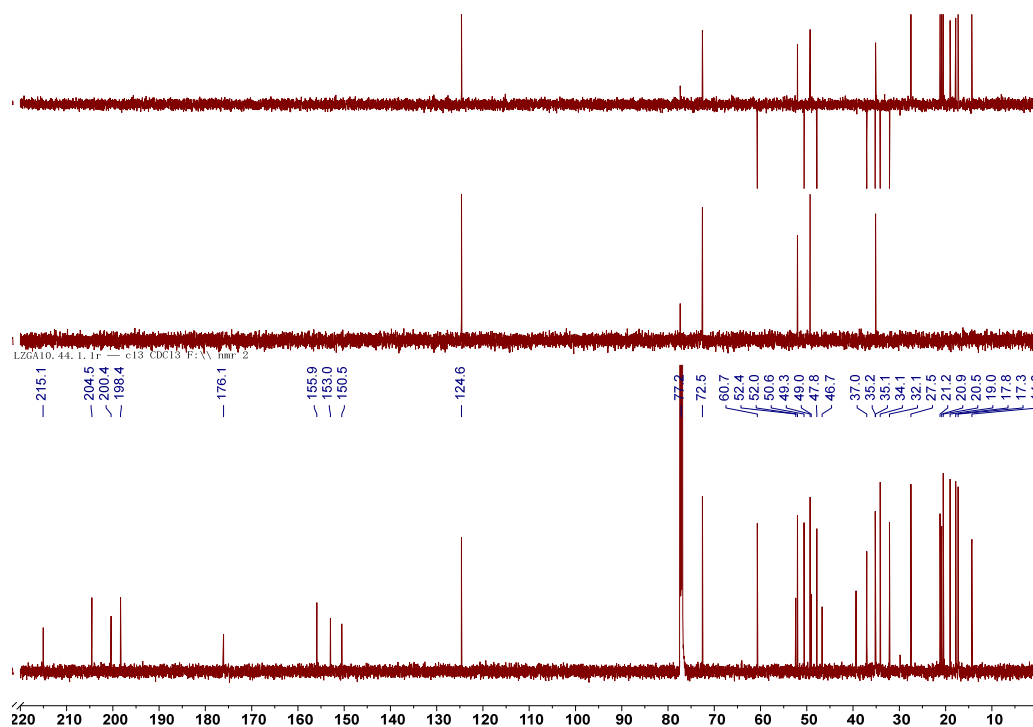

Figure S66. HSQC spectrum of **10**.

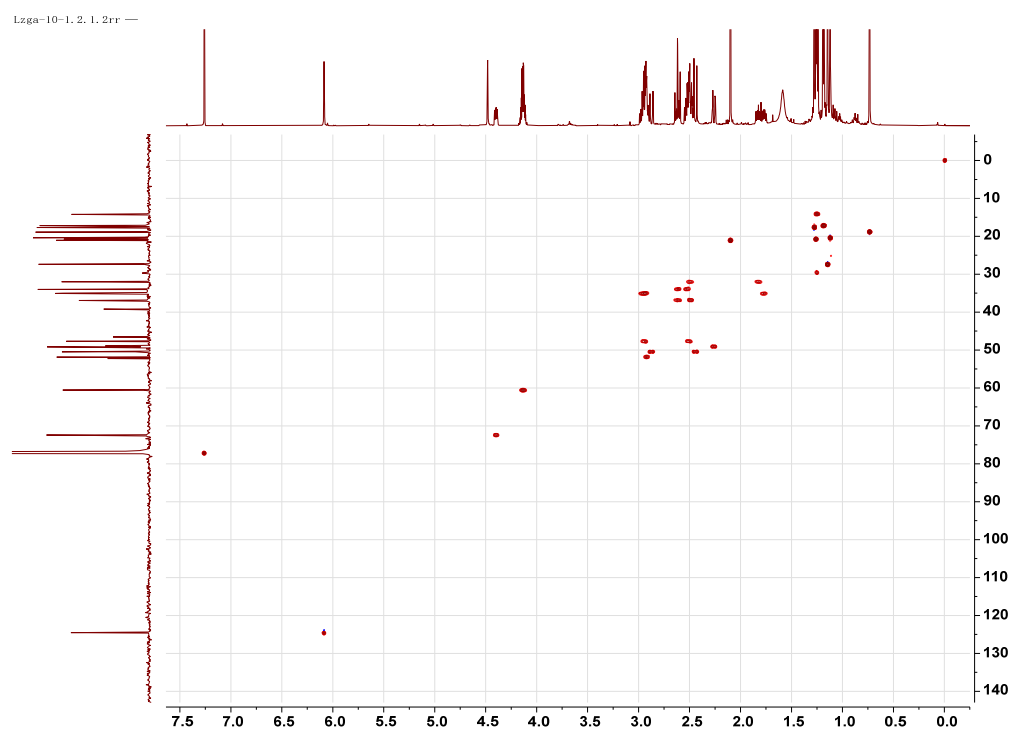

Figure S67. HMBC spectrum of **10**.

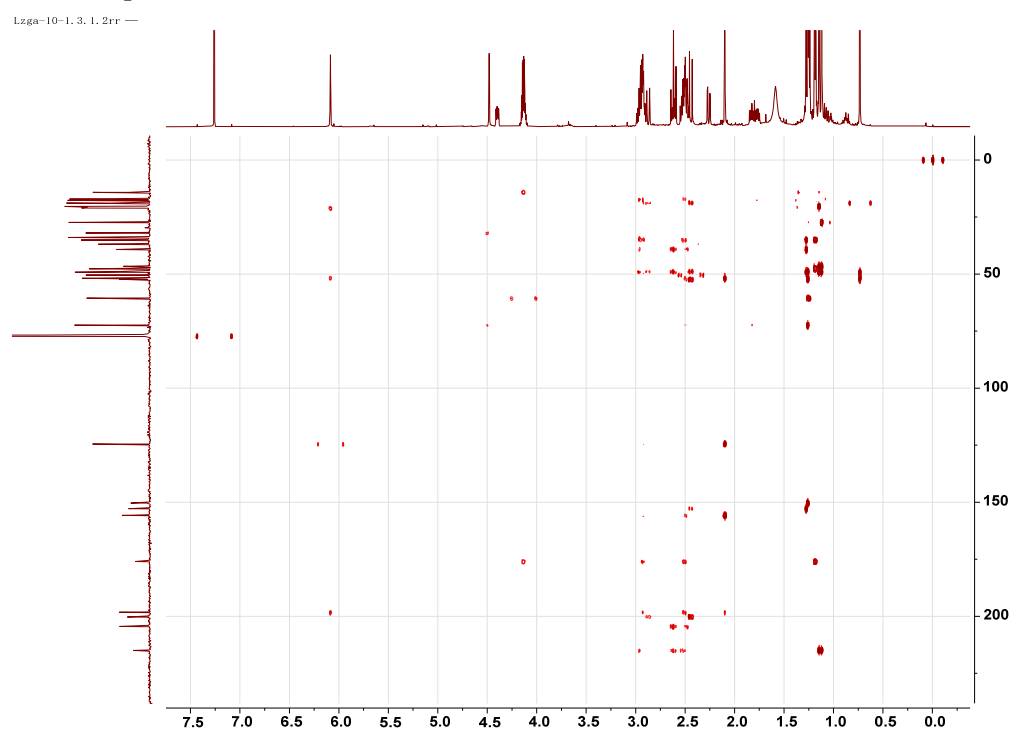

Figure S68.  $^1\text{H}$ - $^1\text{H}$  COSY spectrum of **10**.

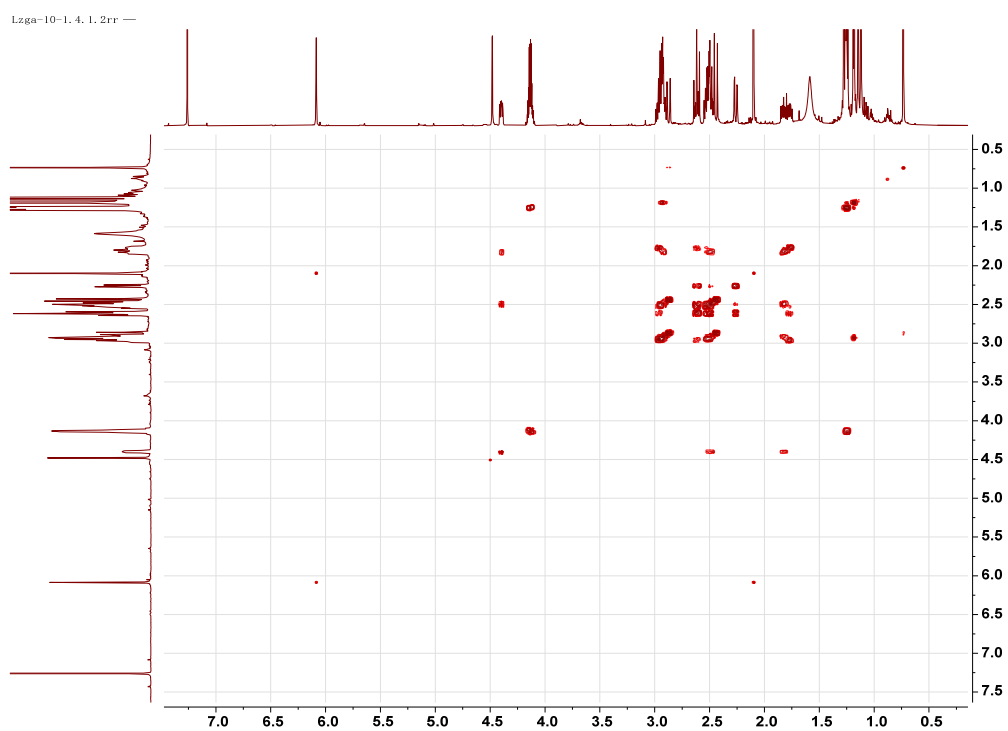

Figure S69. ROESY spectrum of **10**.

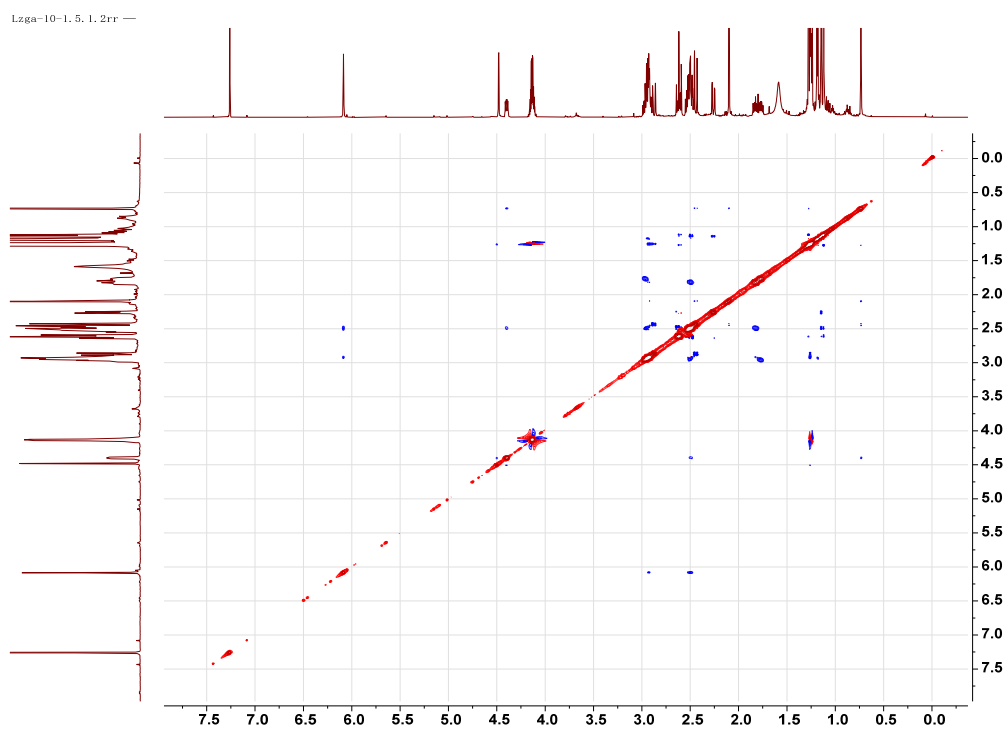

Figure S70. HRESIMS of **10**.

LZGA-10 #15 RT: 0.20 AV: 1 NL: 1.30E8  
T: FTMS + p ESI Full lock ms [150.0000-1100.0000]

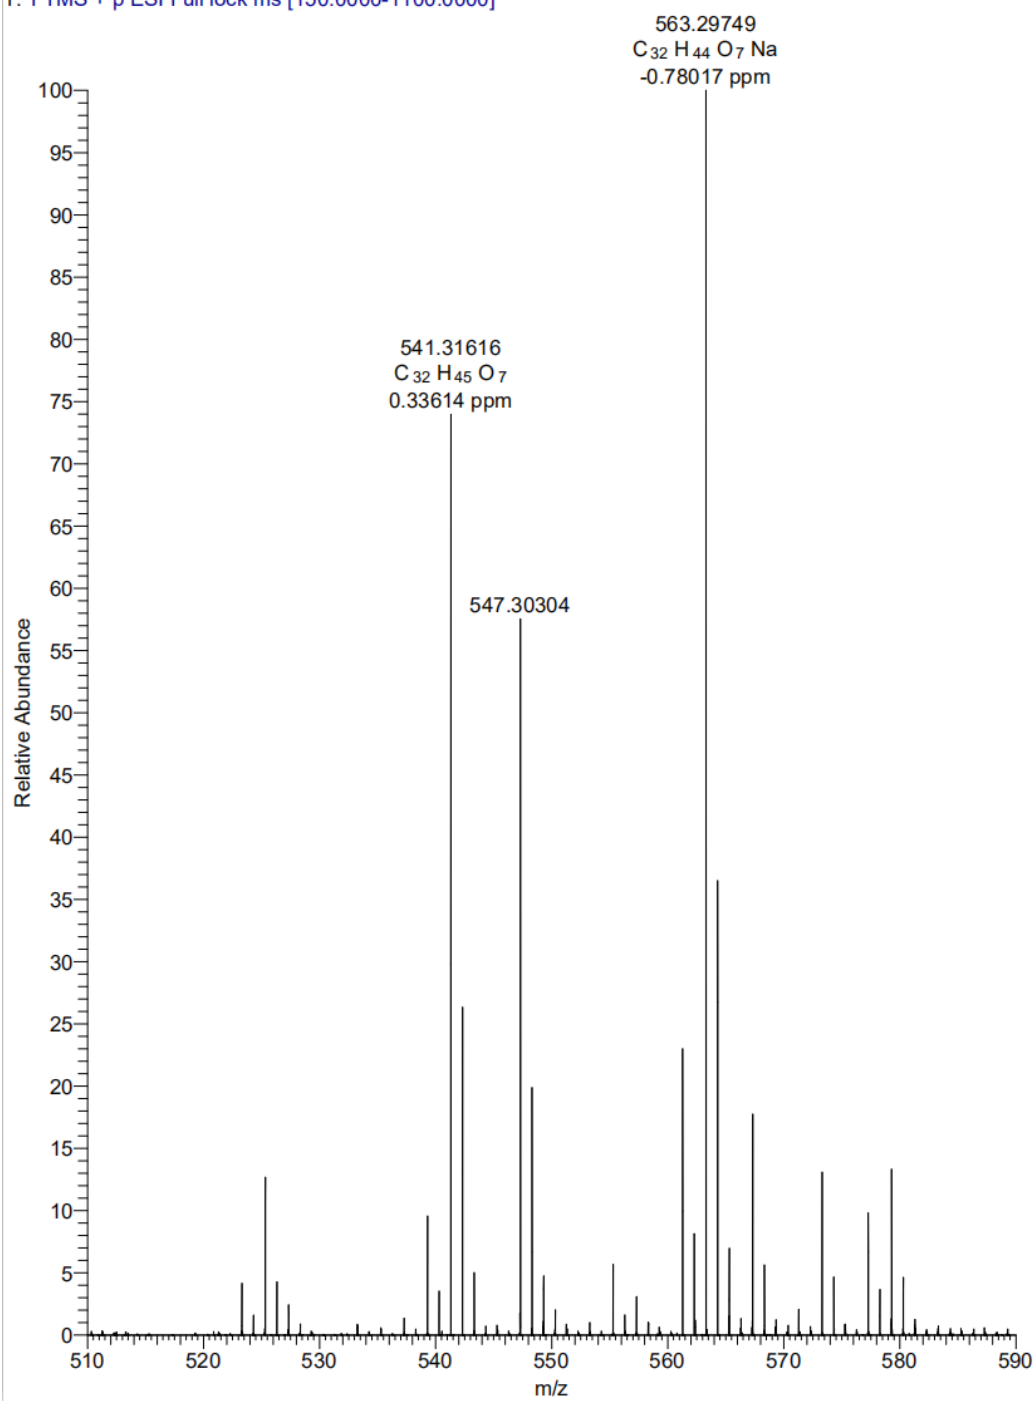

Figure S71.  $^1\text{H}$  NMR spectrum of **11** (600 MHz,  $\text{CDCl}_3$ ).

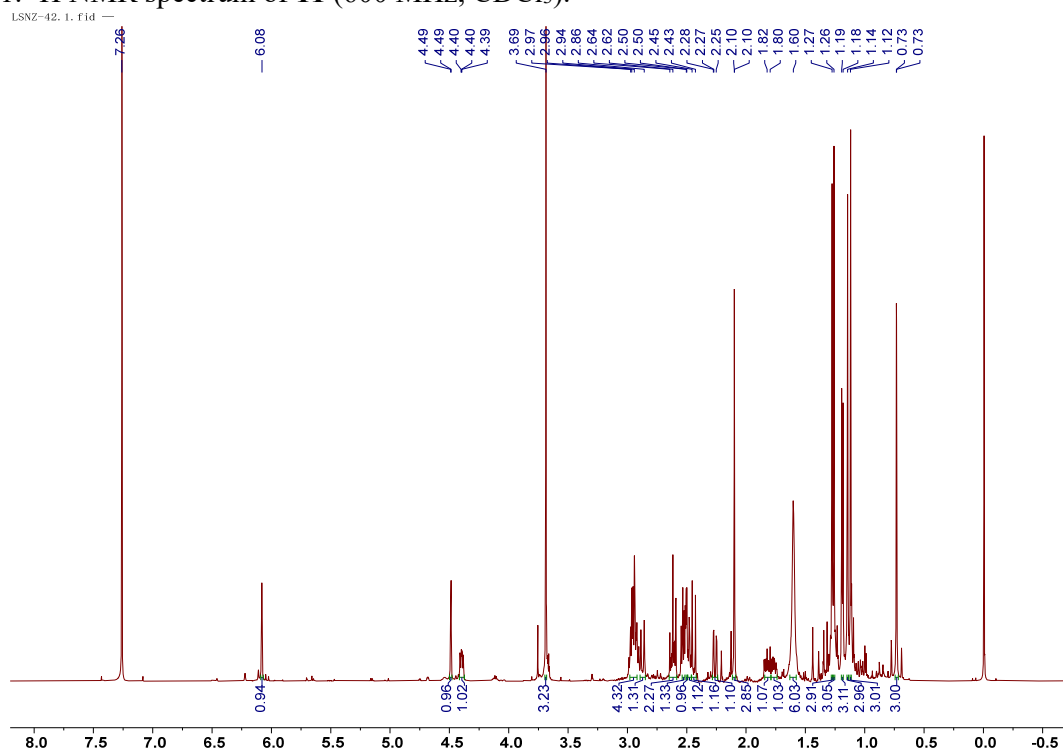

Figure S72.  $^{13}\text{C}$  and DEPT NMR spectra of **11** (150 MHz,  $\text{CDCl}_3$ ).

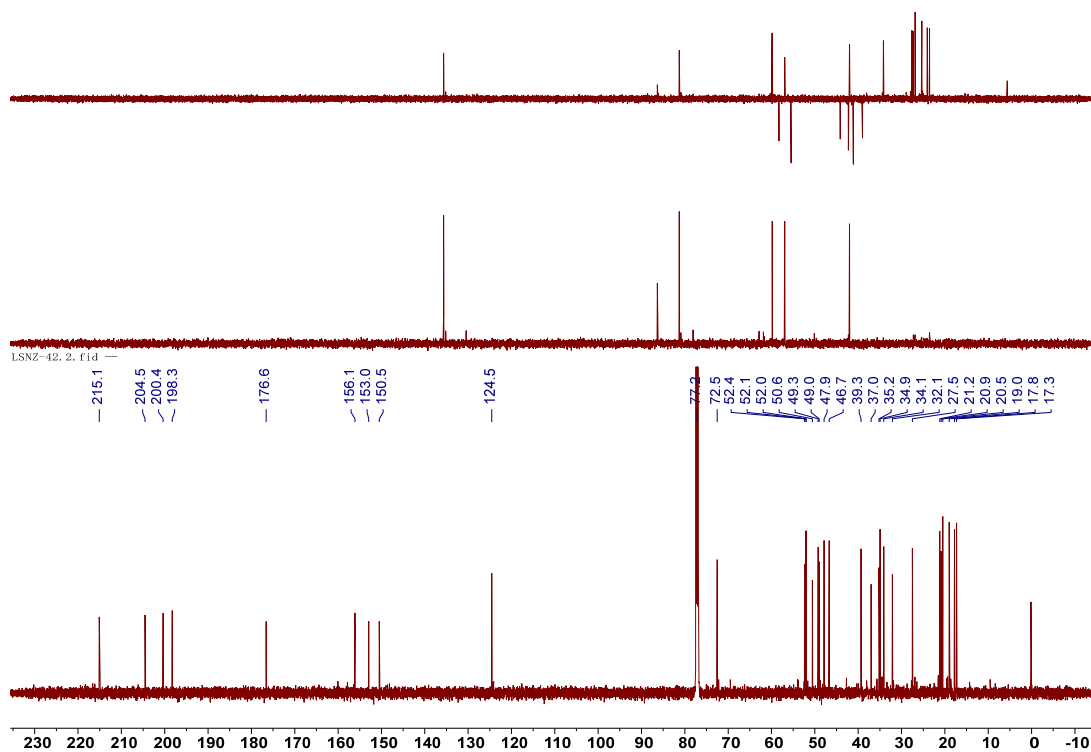

Figure S73. HSQC spectrum of **11**.

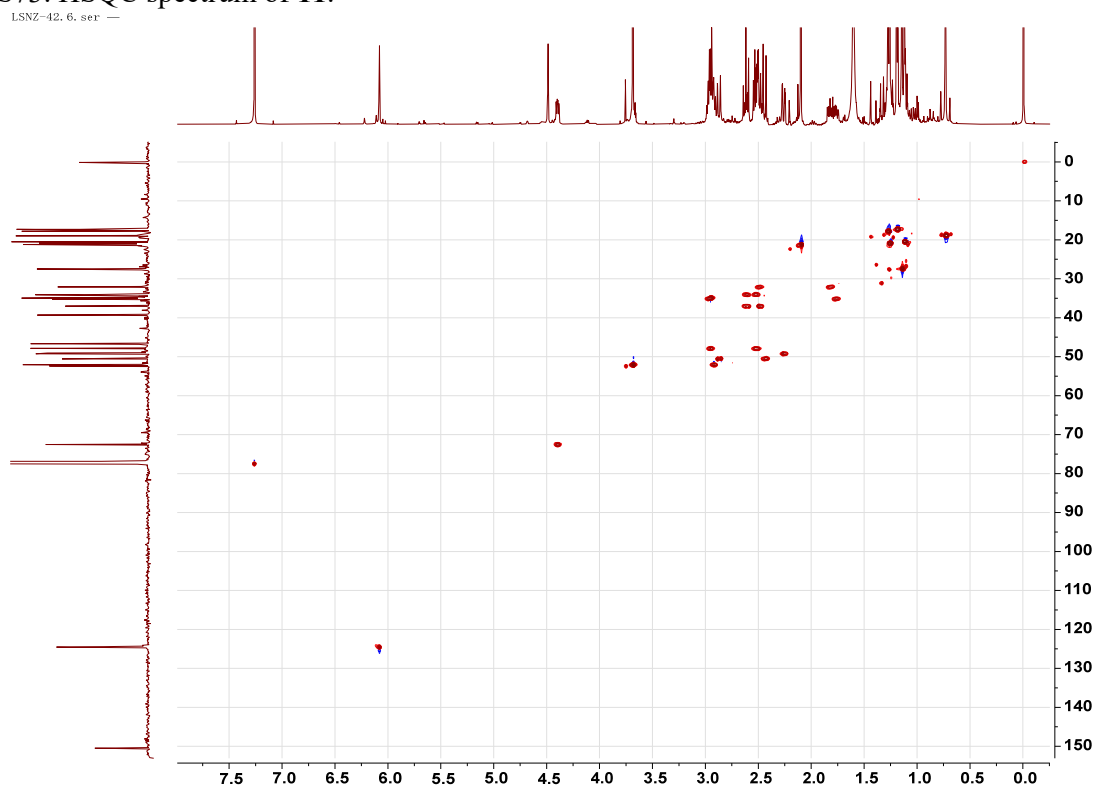

Figure S74. HMBC spectrum of **11**.

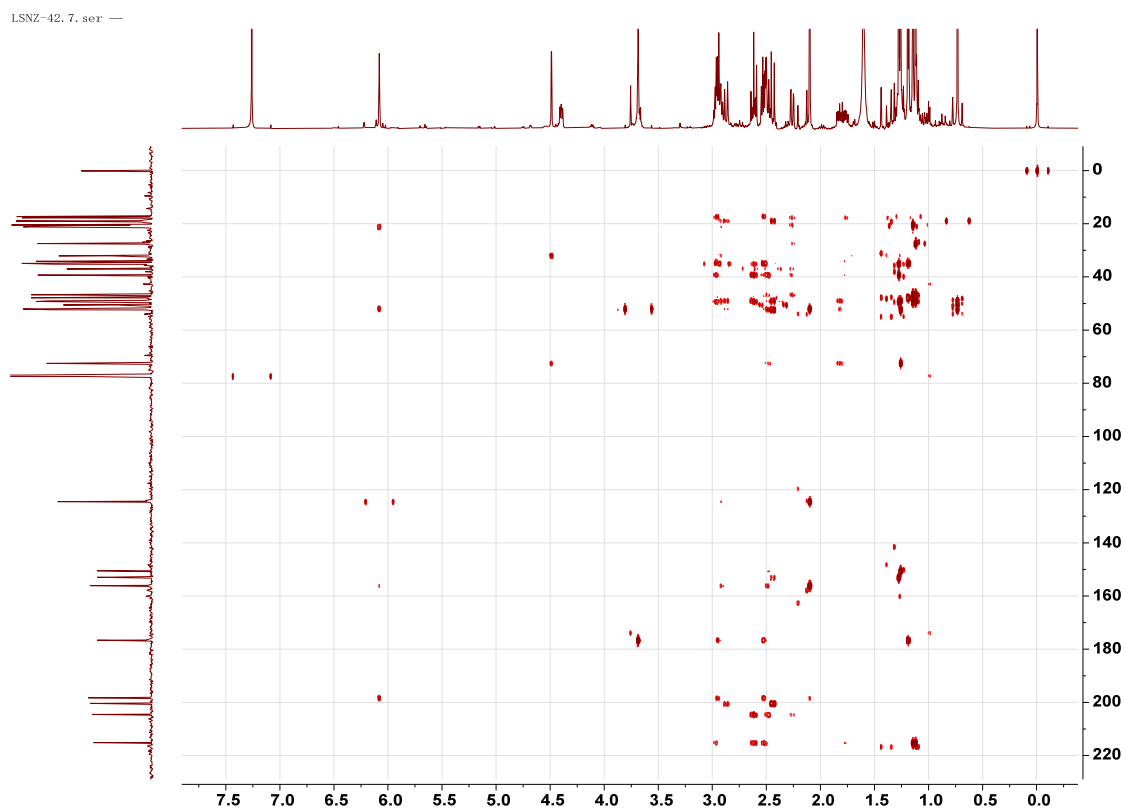

Figure S75.  $^1\text{H}$ - $^1\text{H}$  COSY spectrum of **11**.

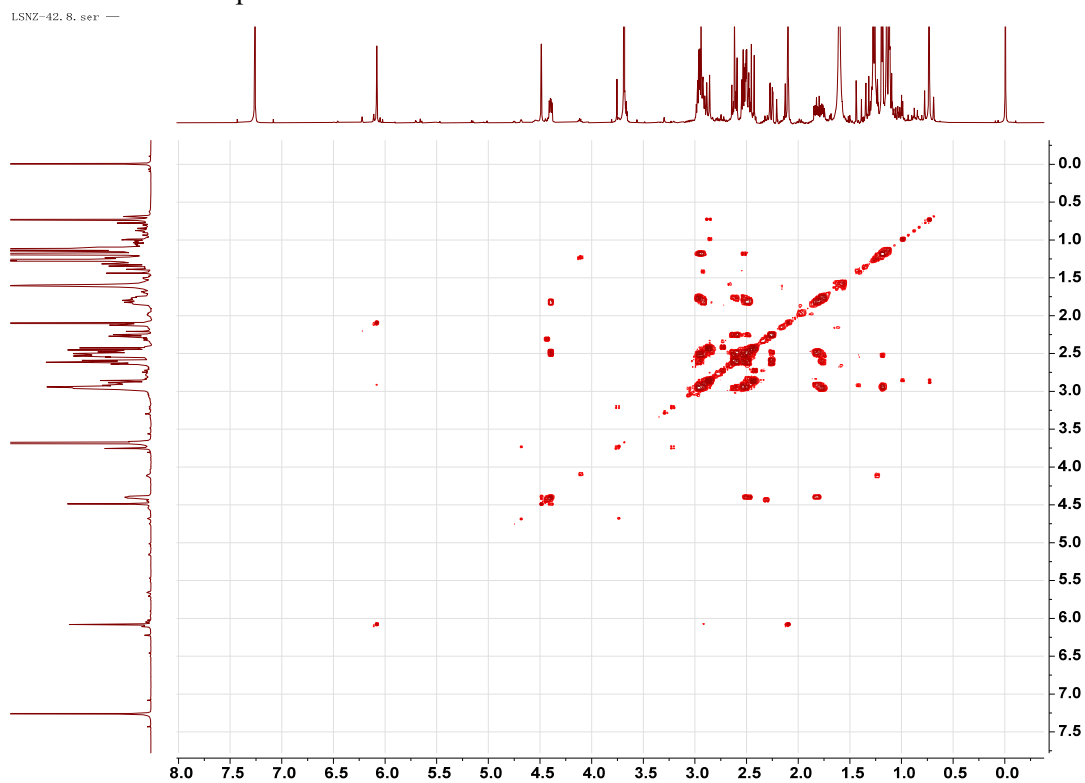

Figure S76. ROESY spectrum of **11**.

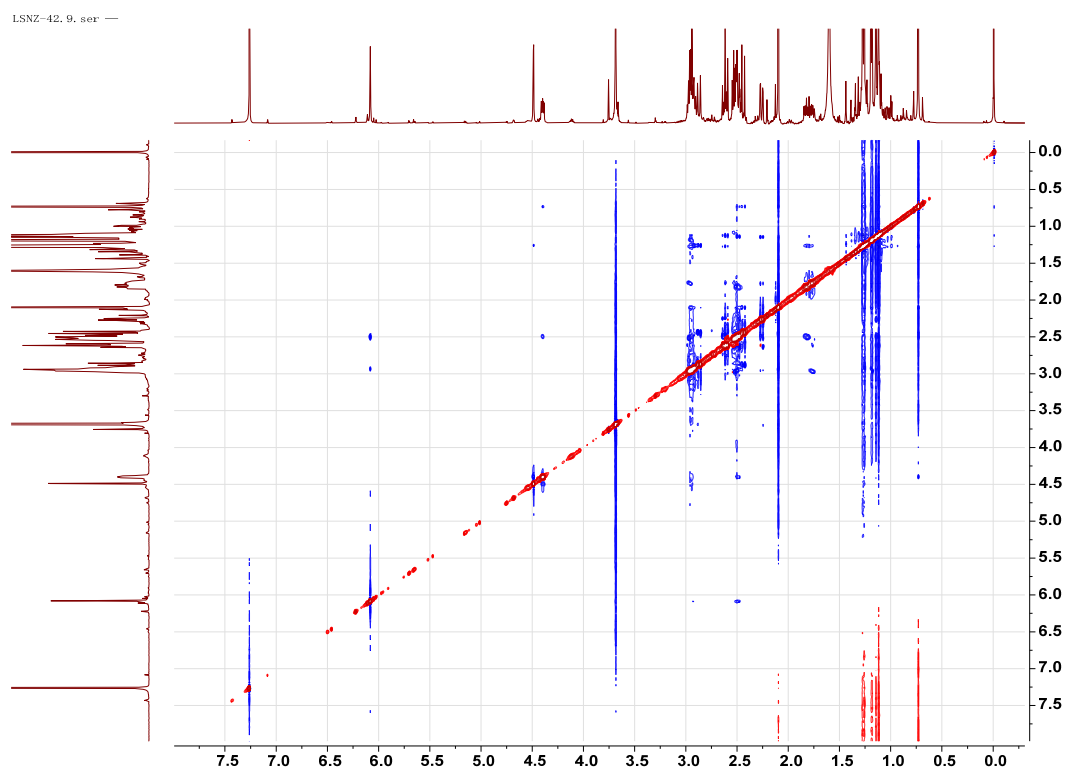

Figure S77. HRESIMS of **11**.

\_SN2-42 #649 RT: 9.13 AV: 1 NL: 1.80E8  
f: FTMS + p ESI Full lock ms [100.0000-1500.0000]

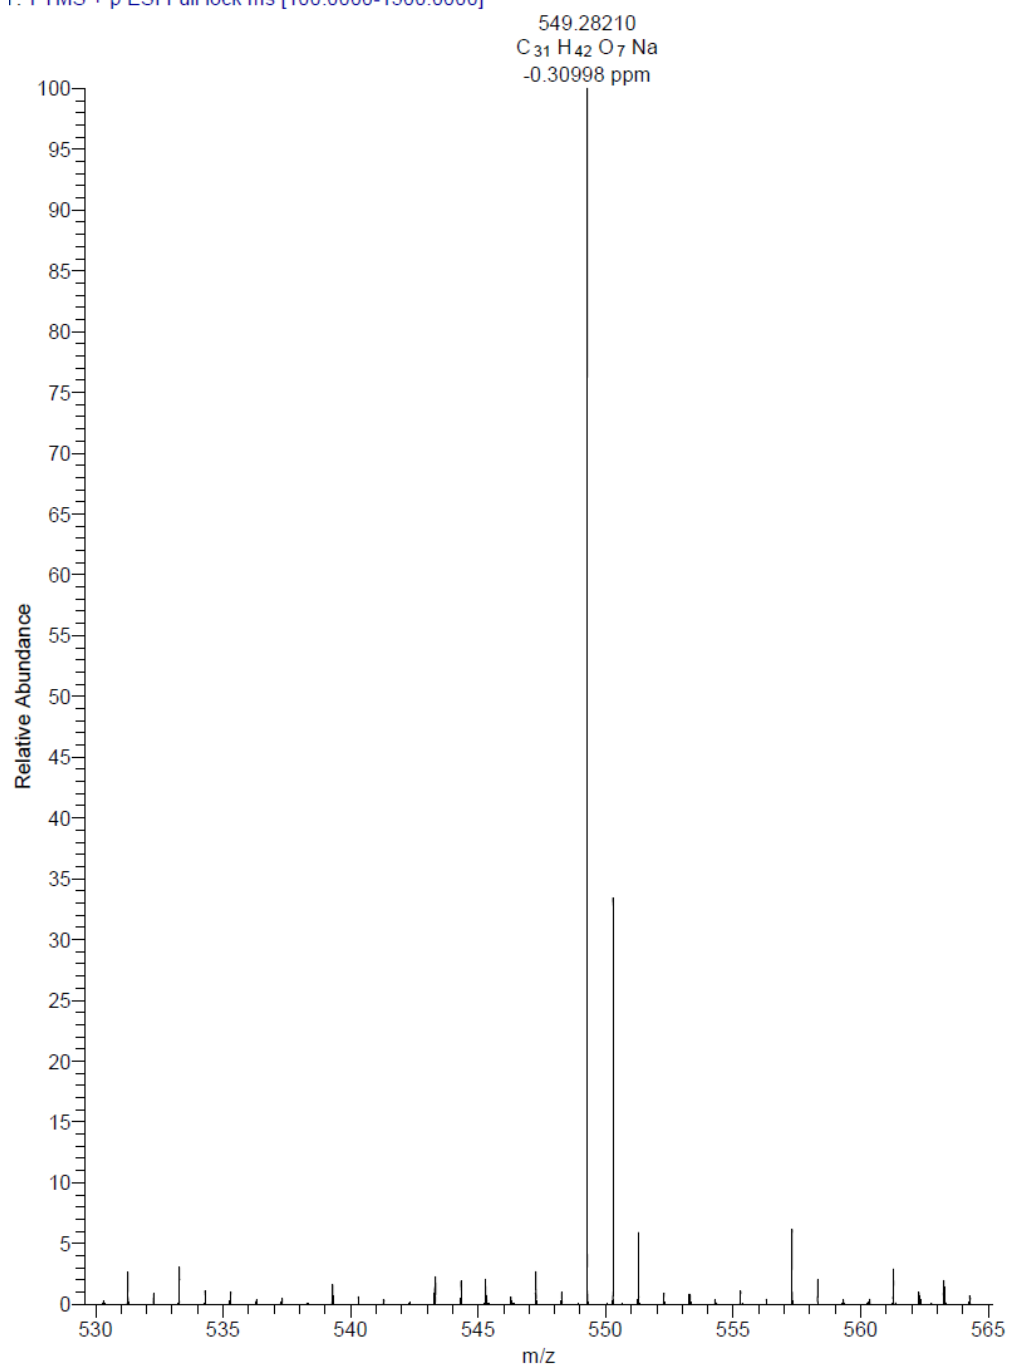



Figure S78.  $^1\text{H}$  NMR spectrum of **12** (600 MHz,  $\text{CDCl}_3$ ).

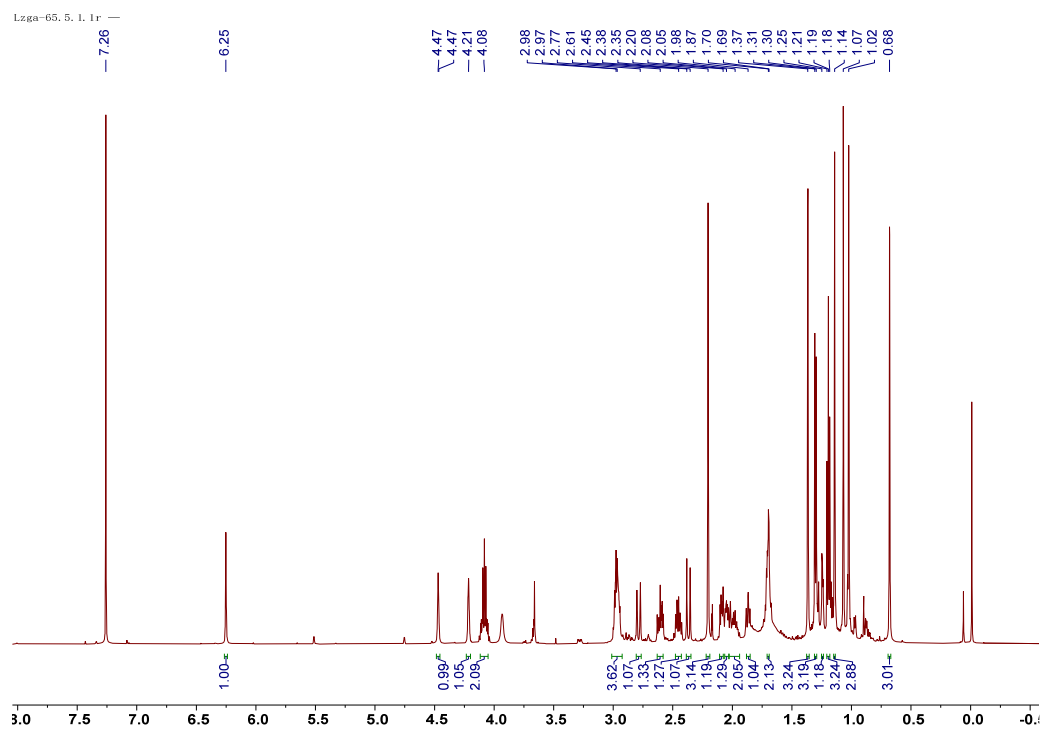

Figure S79.  $^{13}\text{C}$  and DEPT NMR spectra of **12** (150 MHz,  $\text{CDCl}_3$ ).

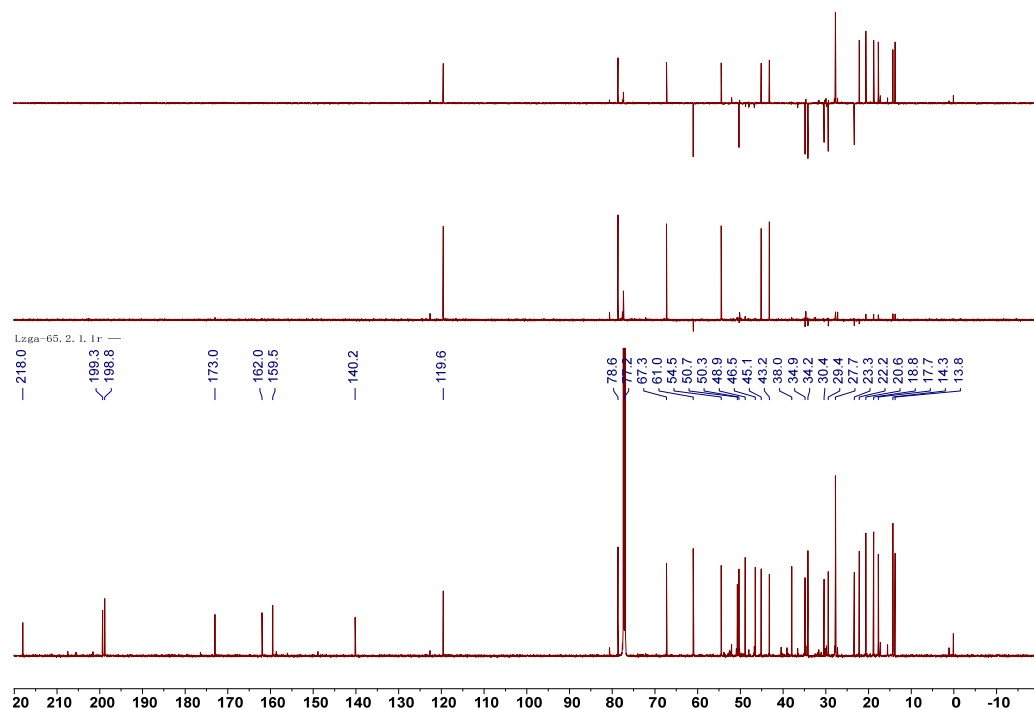

Figure S80. HSQC spectrum of **12**.

Lzga-65.6.1.2rr —

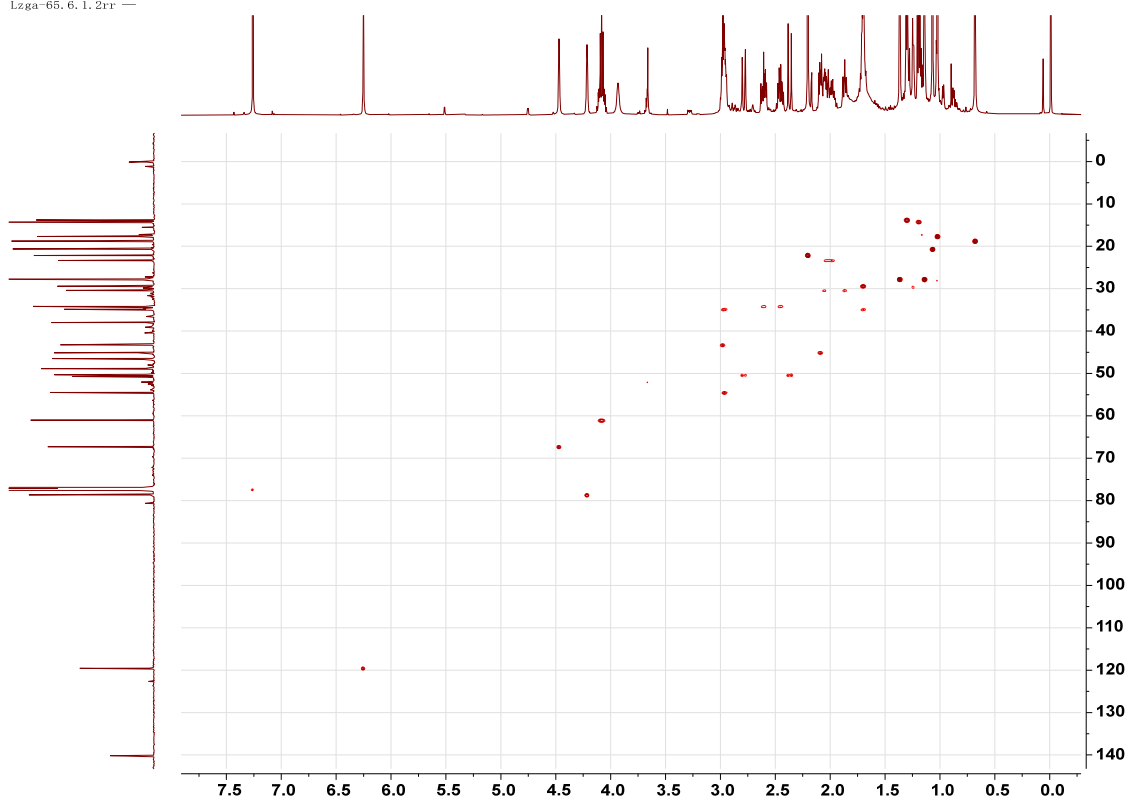

Figure S81. HMBC spectrum of **12**.

Lzga-65.7.1.2rr —

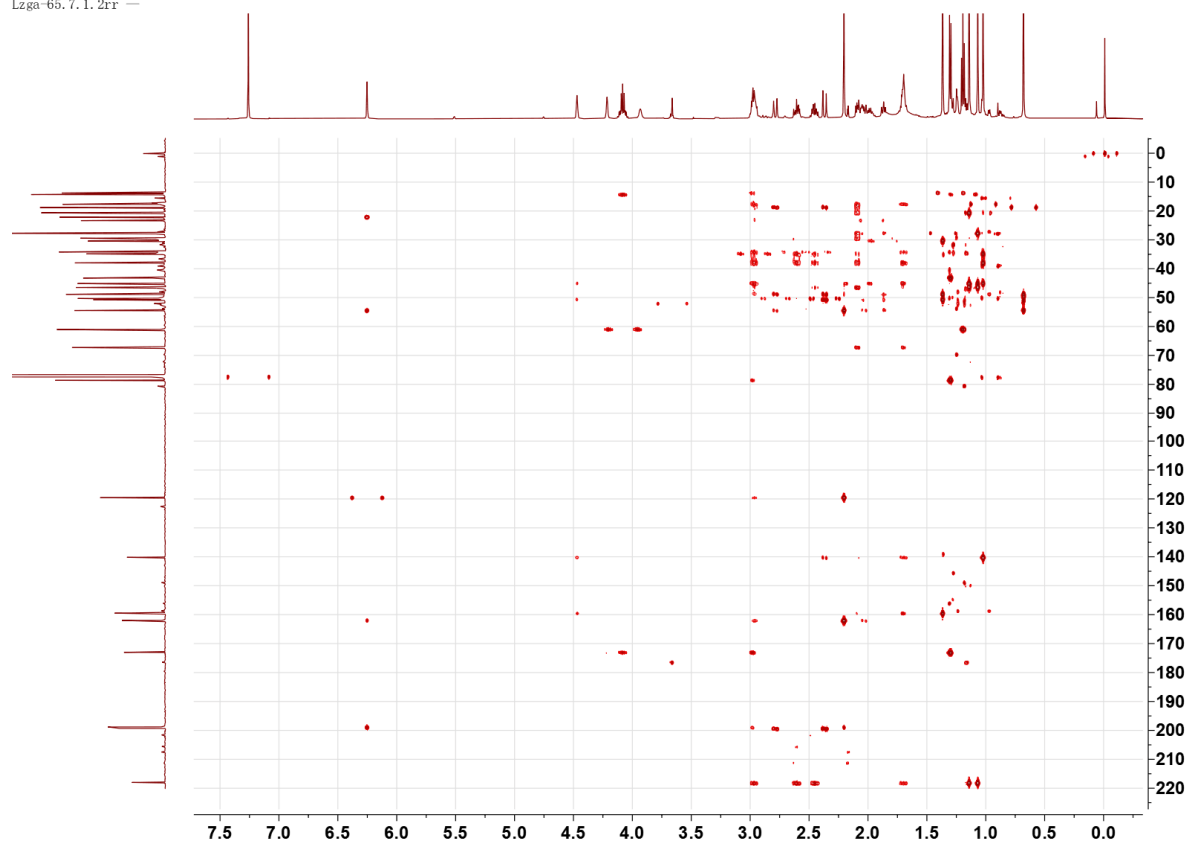

Figure S82.  $^1\text{H}$ - $^1\text{H}$  COSY spectrum of **12**.

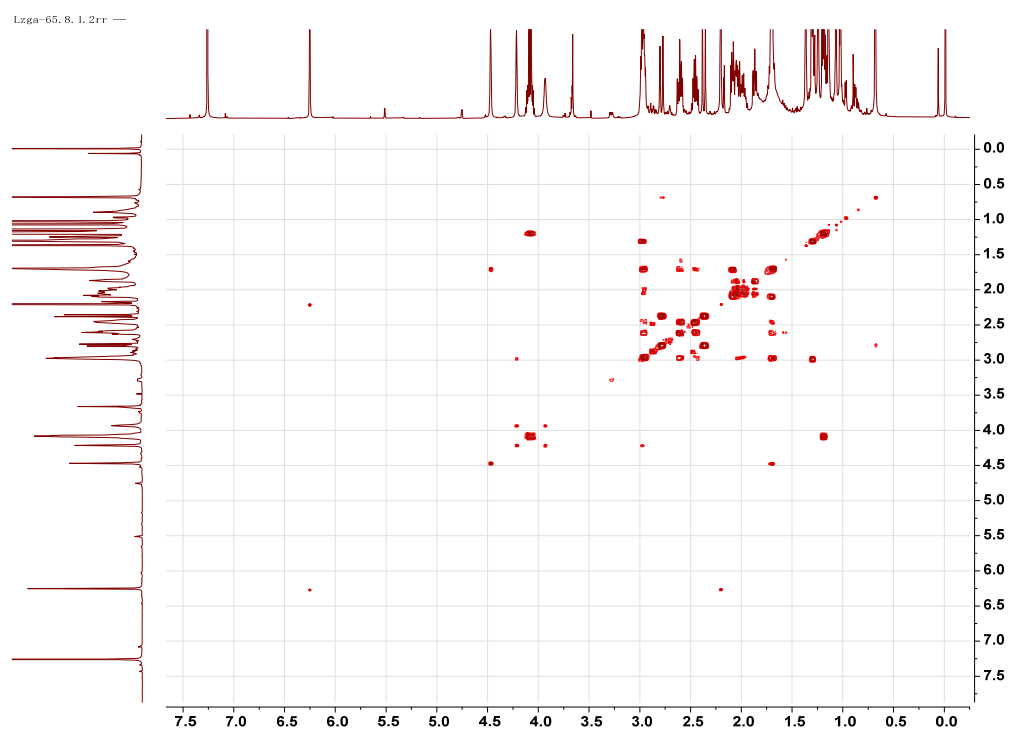

Figure S83. ROESY spectrum of **12**.

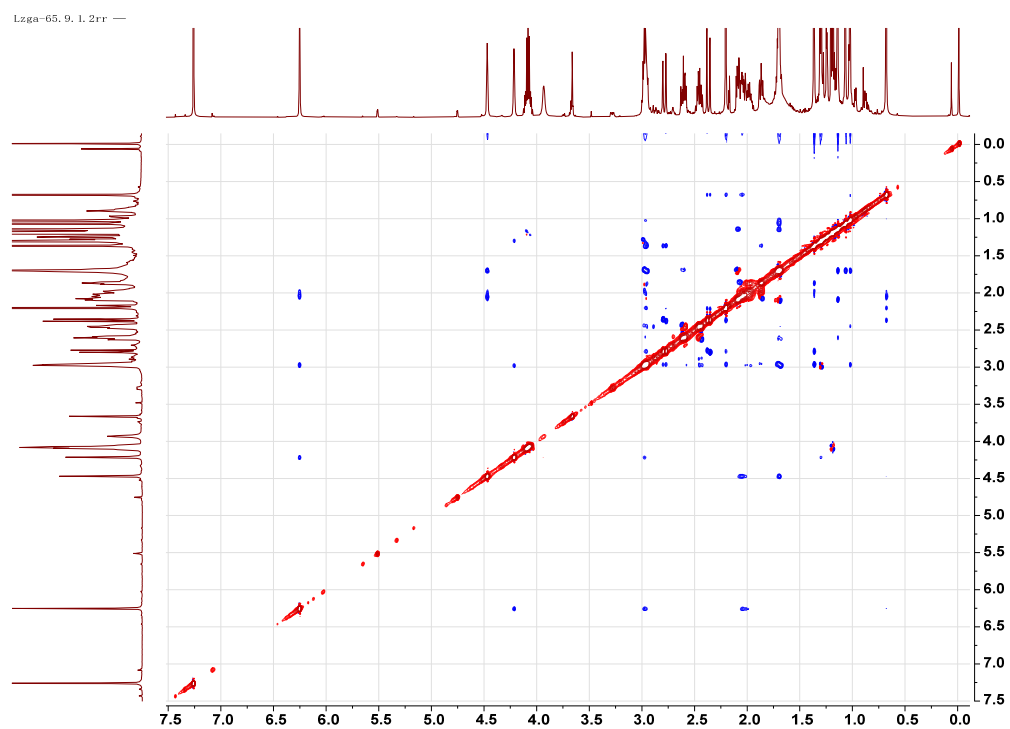

Figure S84. HRESIMS of **12**.

LZGA-65 #15 RT: 0.20 AV: 1 NL: 3.49E8  
T: FTMS + p ESI Full lock ms [150.0000-1100.0000]

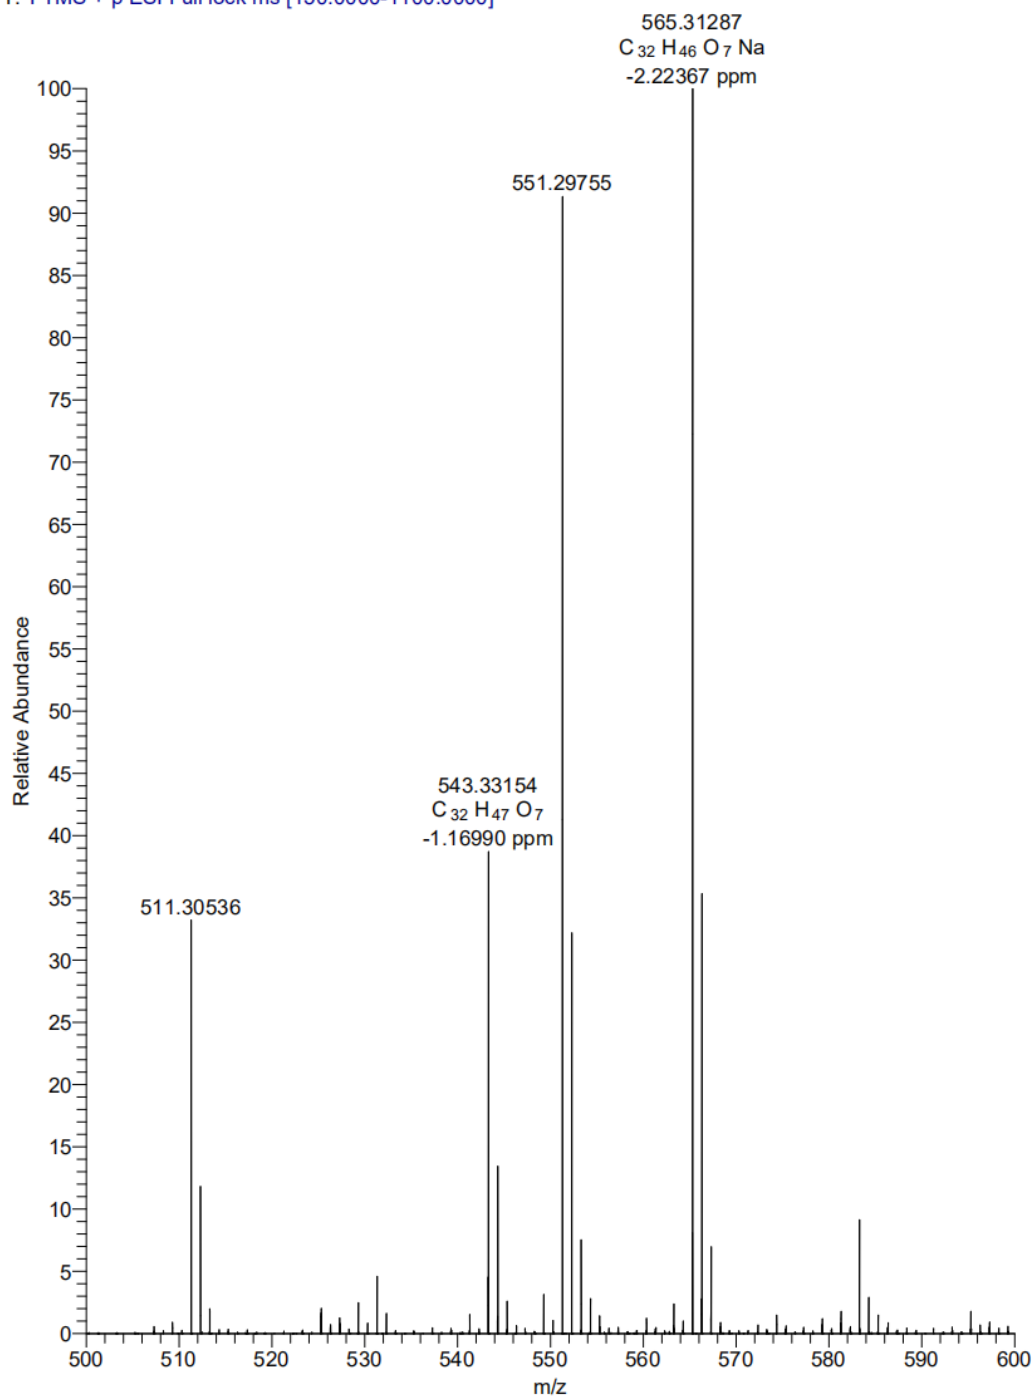

Figure S85.  $^1\text{H}$  NMR spectrum of **13** (600 MHz,  $\text{CDCl}_3$ ).

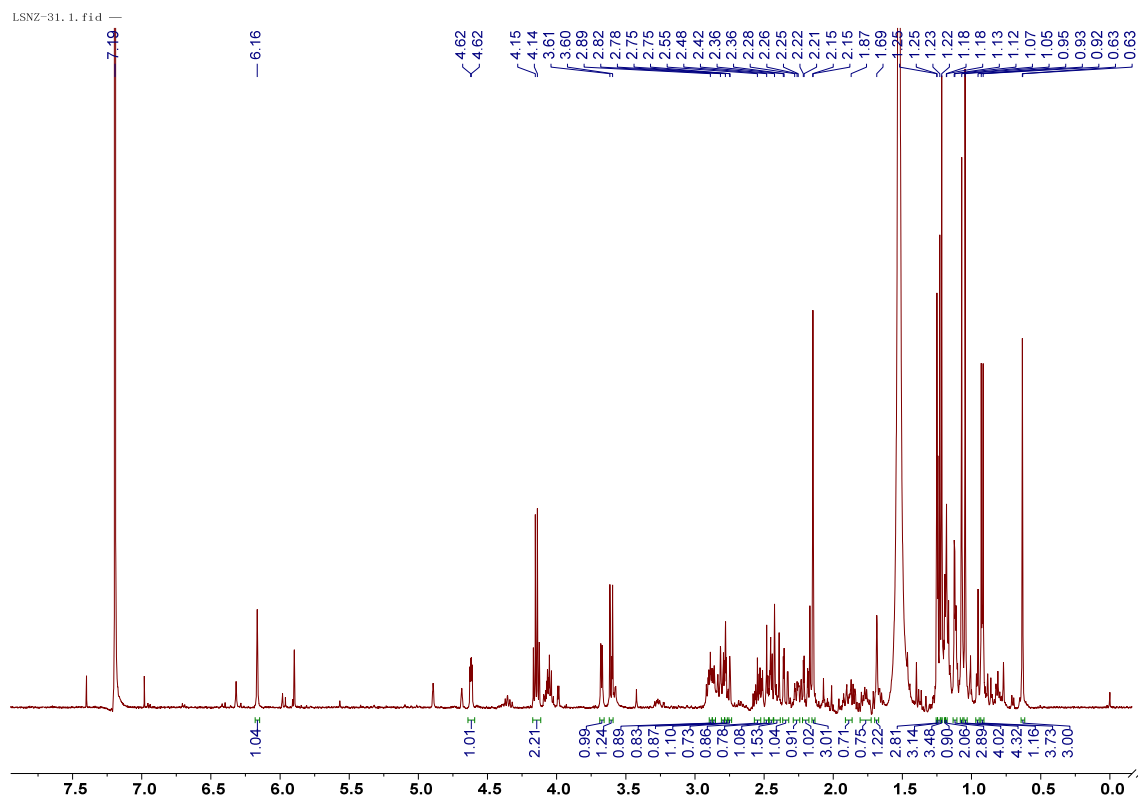

Figure S86.  $^{13}\text{C}$  and DEPT NMR spectra of **13** (150 MHz,  $\text{CDCl}_3$ ).

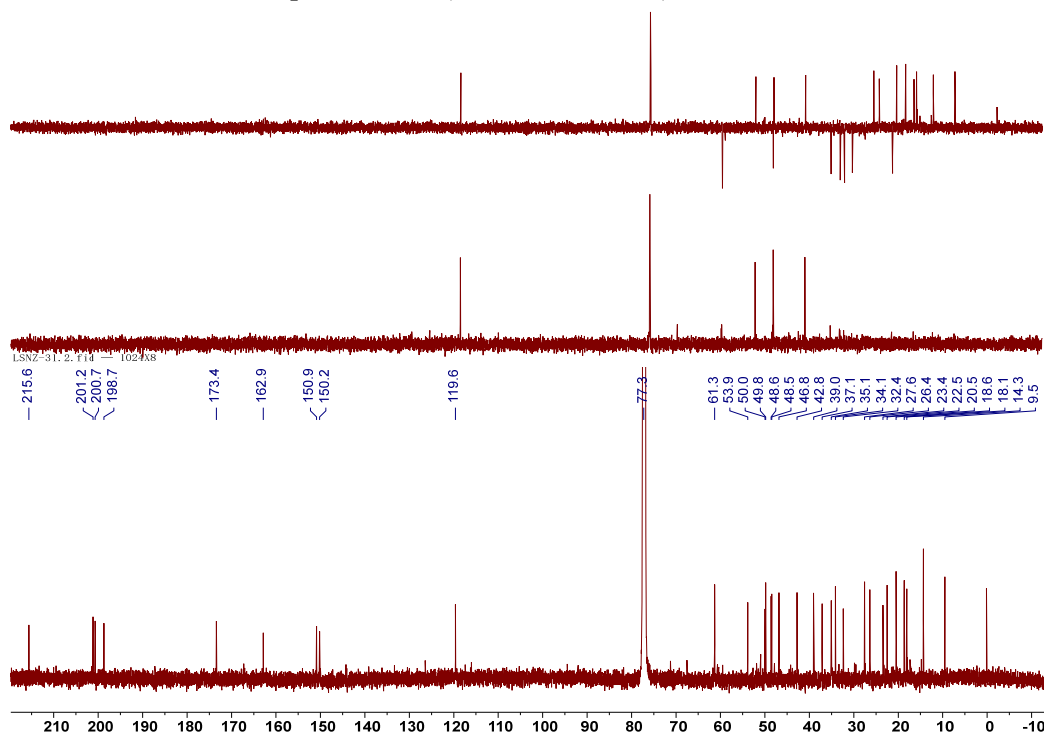

Figure S87. HSQC spectrum of **13**.

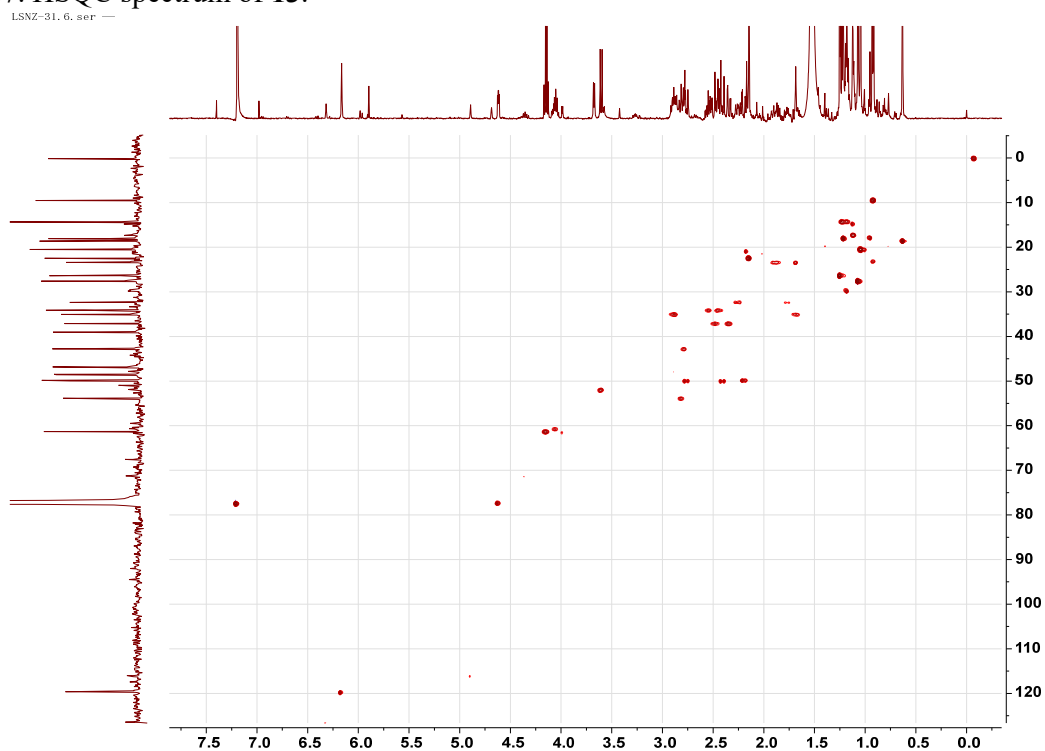

Figure S88. HMBC spectrum of **13**.

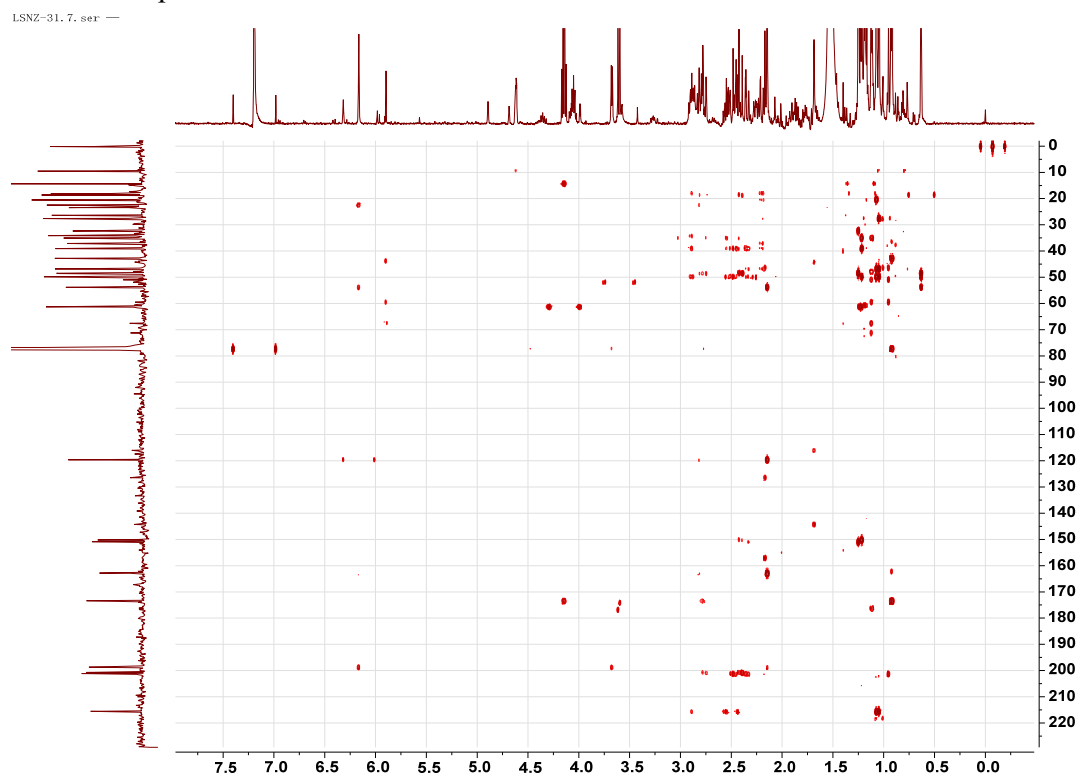

Figure S89.  $^1\text{H}$ - $^1\text{H}$  COSY spectrum of **13**.

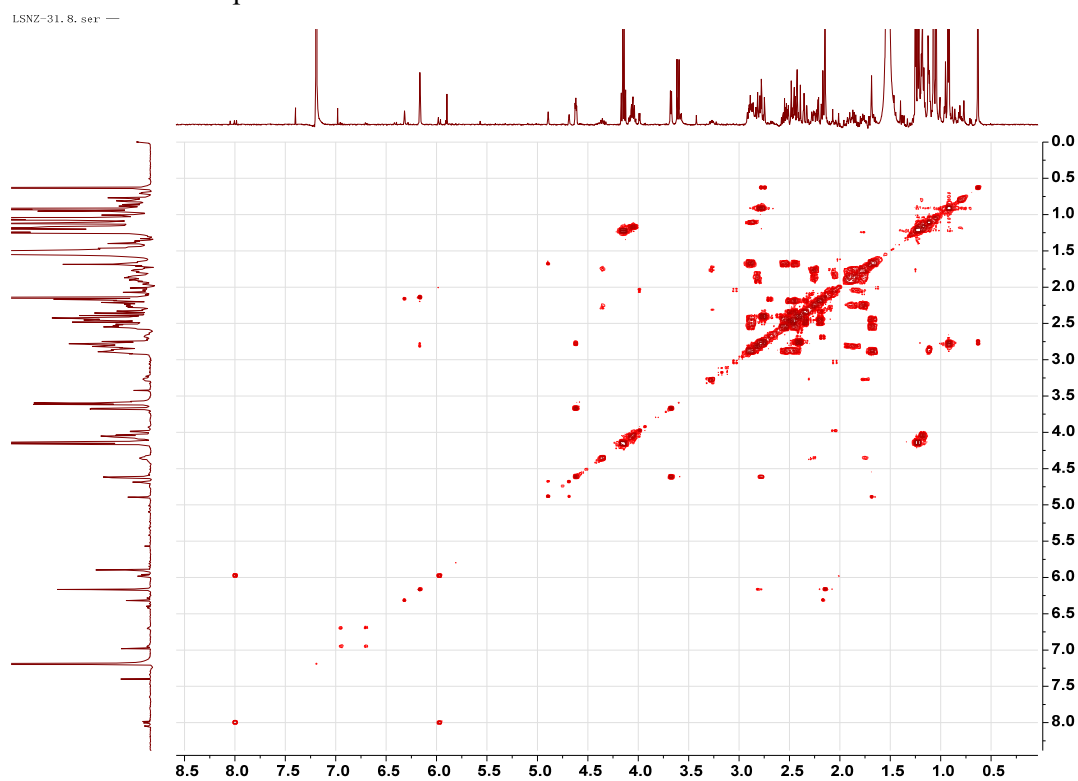

Figure S90. ROESY spectrum of **13**.

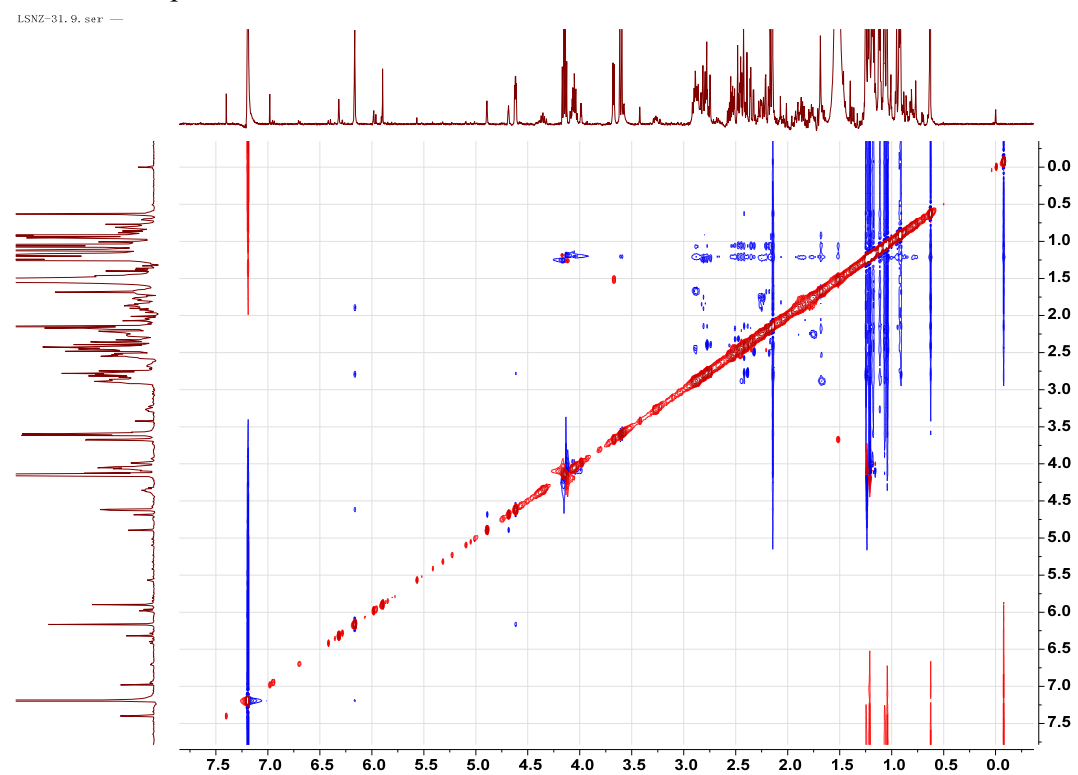

Figure S91. HRESIMS of **13**.

LSN2-31 #705 RT: 9.91 AV: 1 NL: 9.27E7

T: FTMS + p ESI Full lock ms [100.0000-1500.0000]

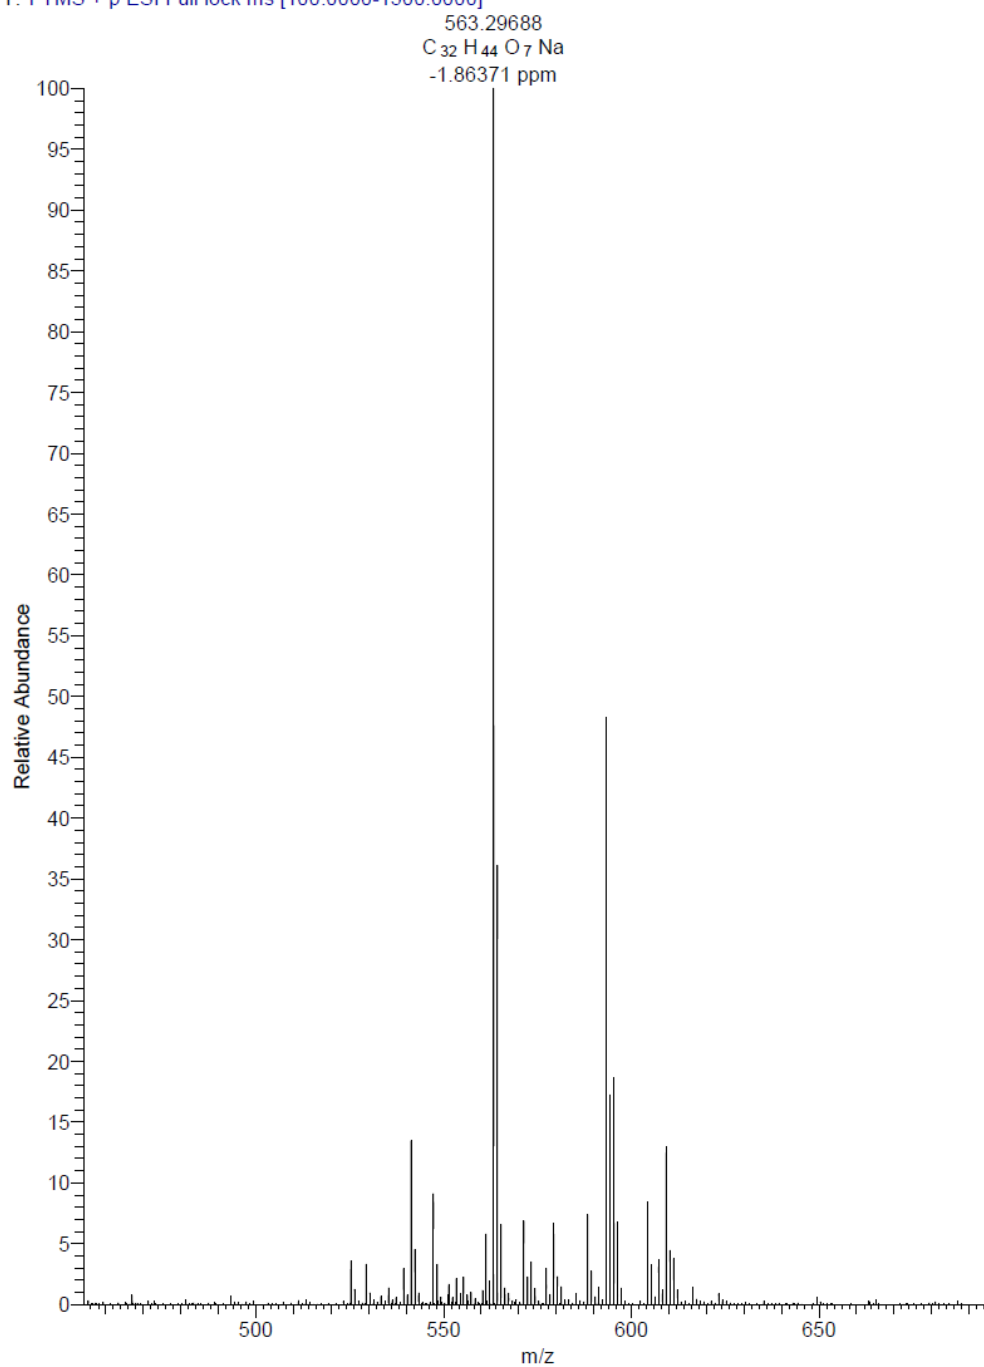



Figure S92.  $^1\text{H}$  NMR spectrum of **1a** (600 MHz,  $\text{CDCl}_3$ ).

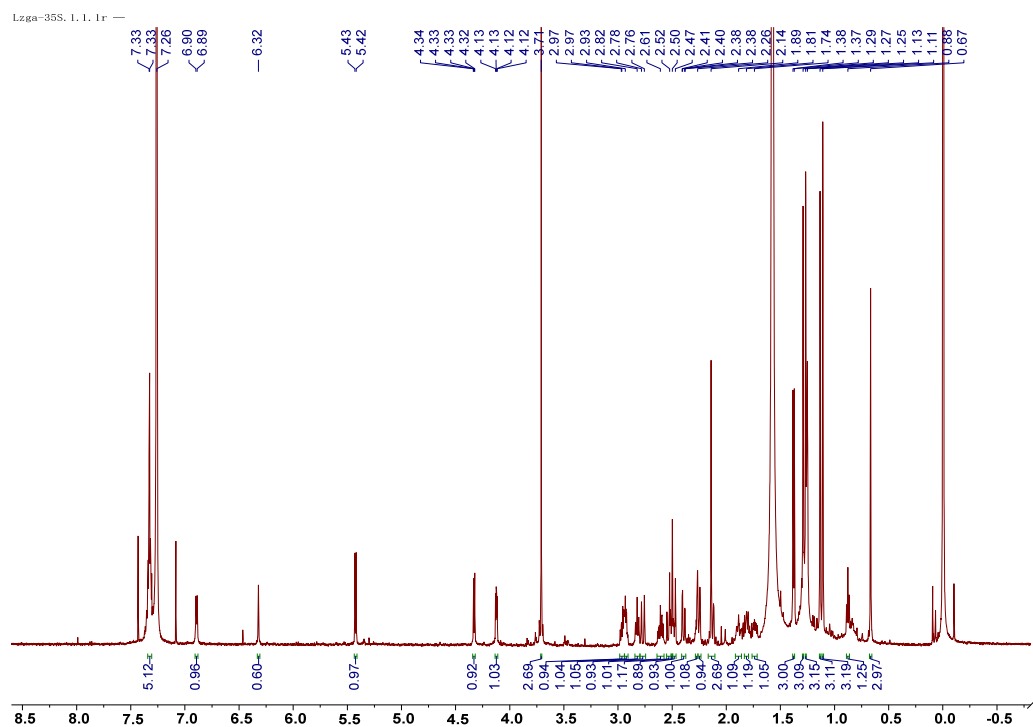

Figure S93.  $^1\text{H}$ - $^1\text{H}$  COSY spectrum of **1a**.

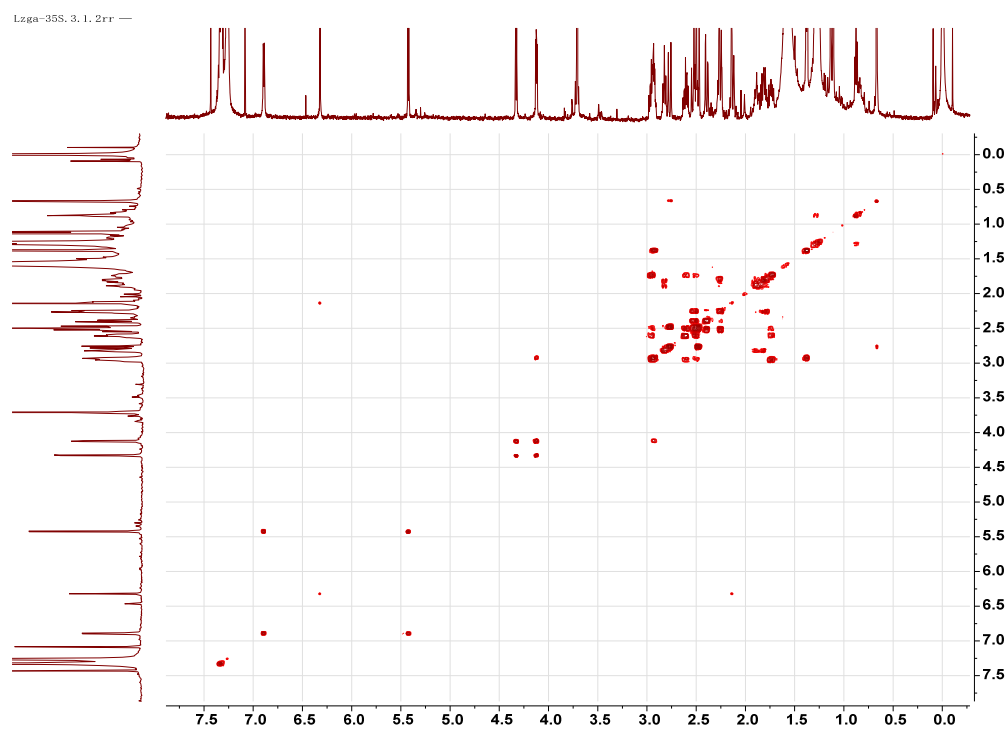

Figure S94.  $^1\text{H}$  NMR spectrum of **1b** (600 MHz,  $\text{CDCl}_3$ ).

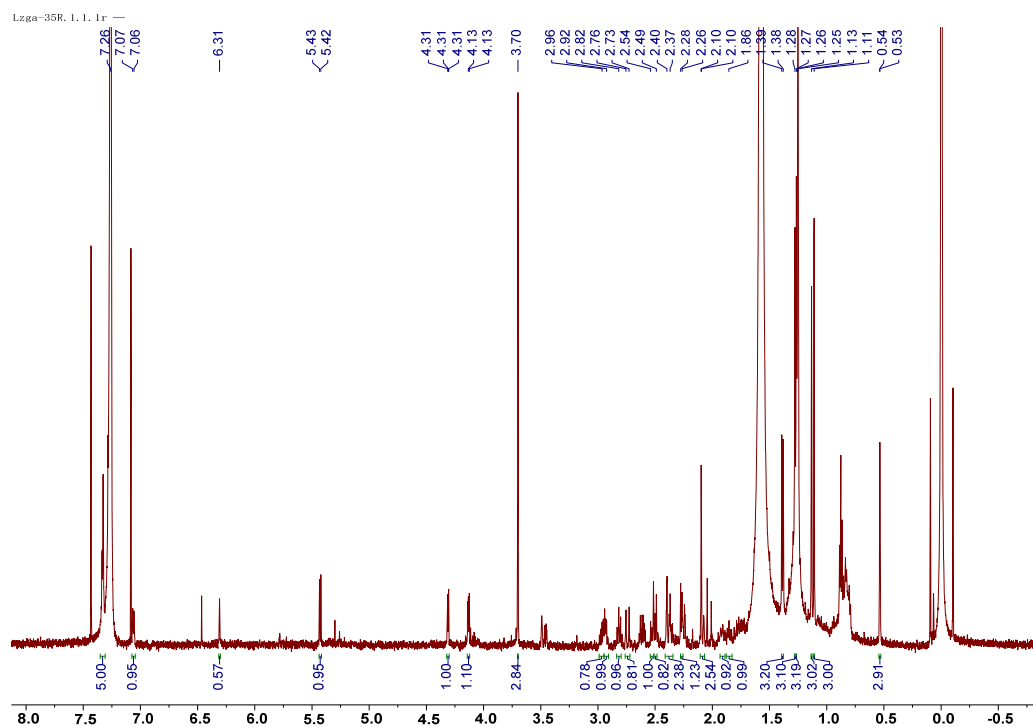

Figure S95.  $^1\text{H}$ - $^1\text{H}$  COSY spectrum of **1b**.

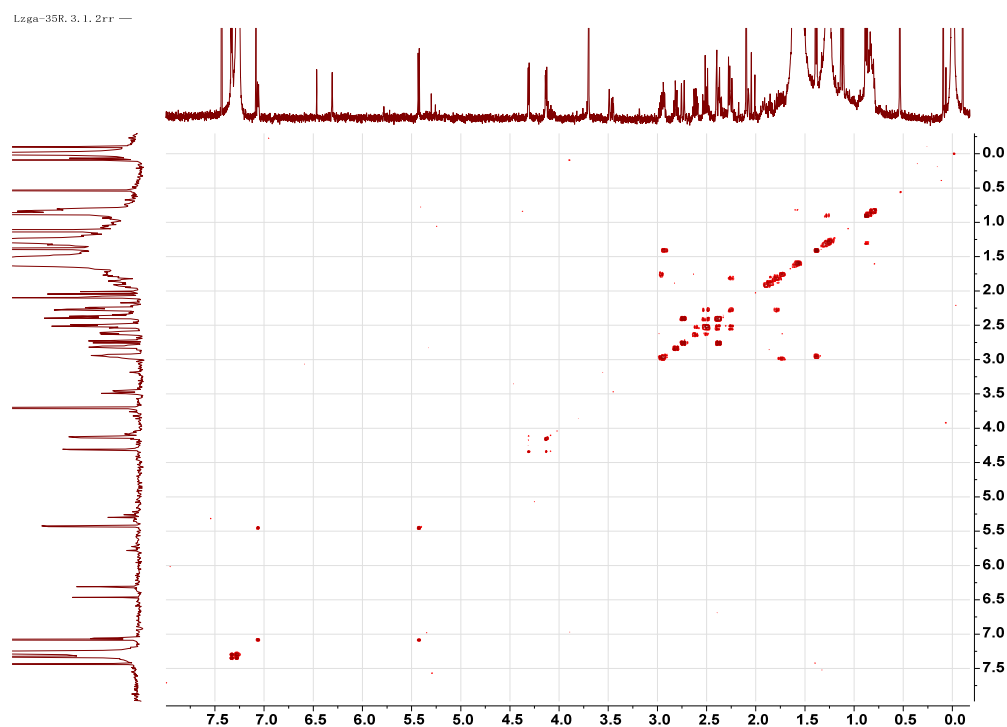

Figure S96. HRESIMS of **1a**.

ZGA-35S-2 #13 RT: 0.17 AV: 1 NL: 8.77E7

FTMS + p ESI Full ms [400.0000-1300.0000]

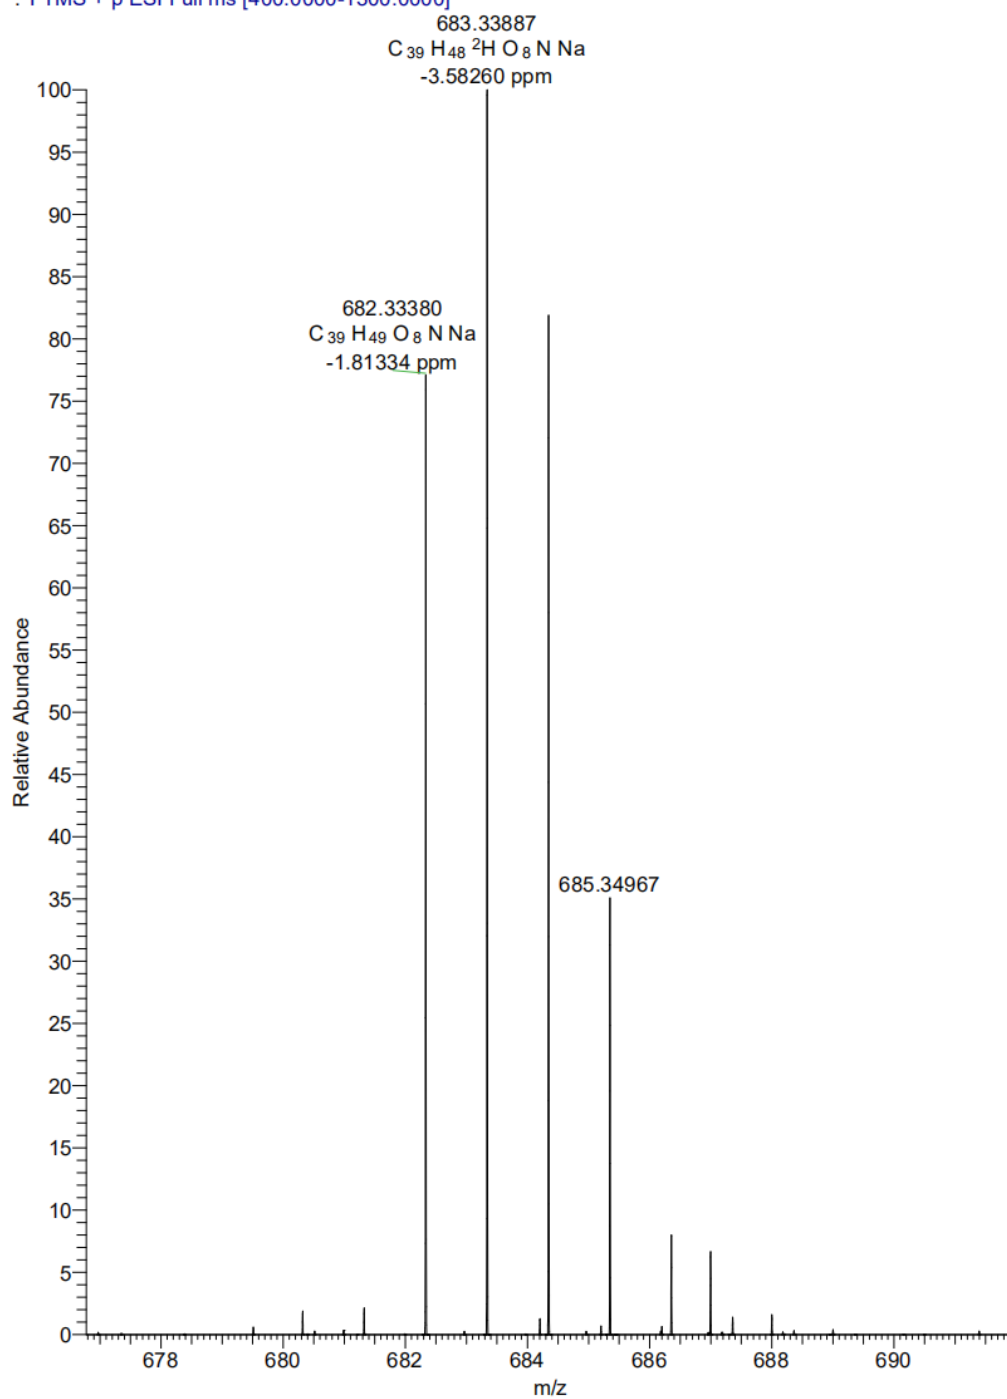

Figure S97. HRESIMS of **1b**.

LZGA-35R-2 #13 RT: 0.17 AV: 1 NL: 3.77E7  
T: FTMS + p ESI Full ms [400.0000-1300.0000]

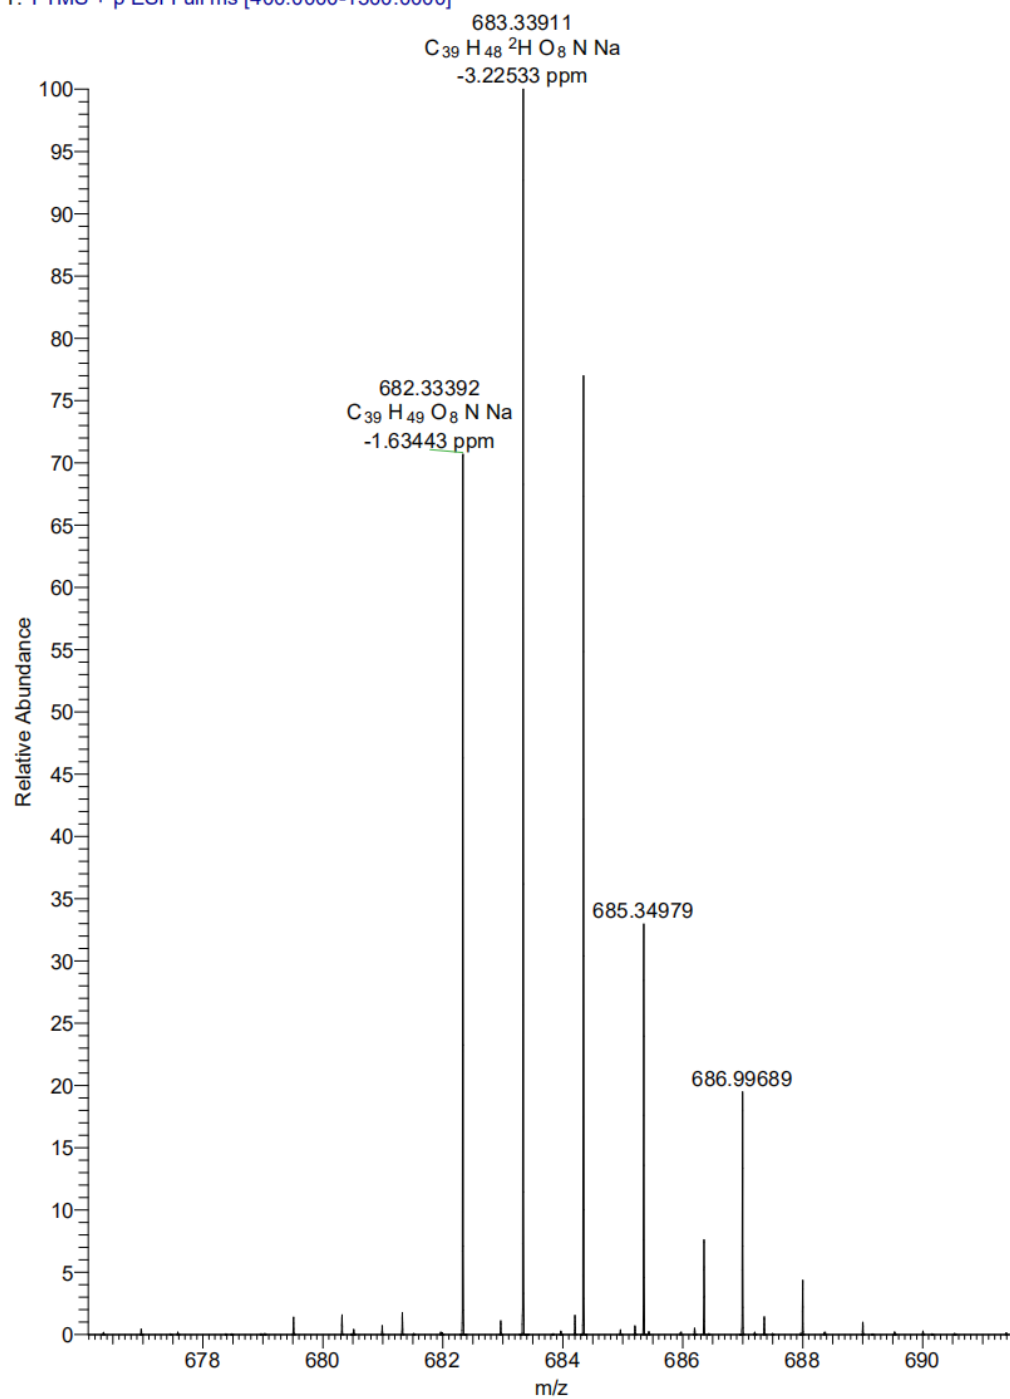

Figure S98.  $^1\text{H}$  NMR spectrum of **2a** (600 MHz,  $\text{CDCl}_3$ ).

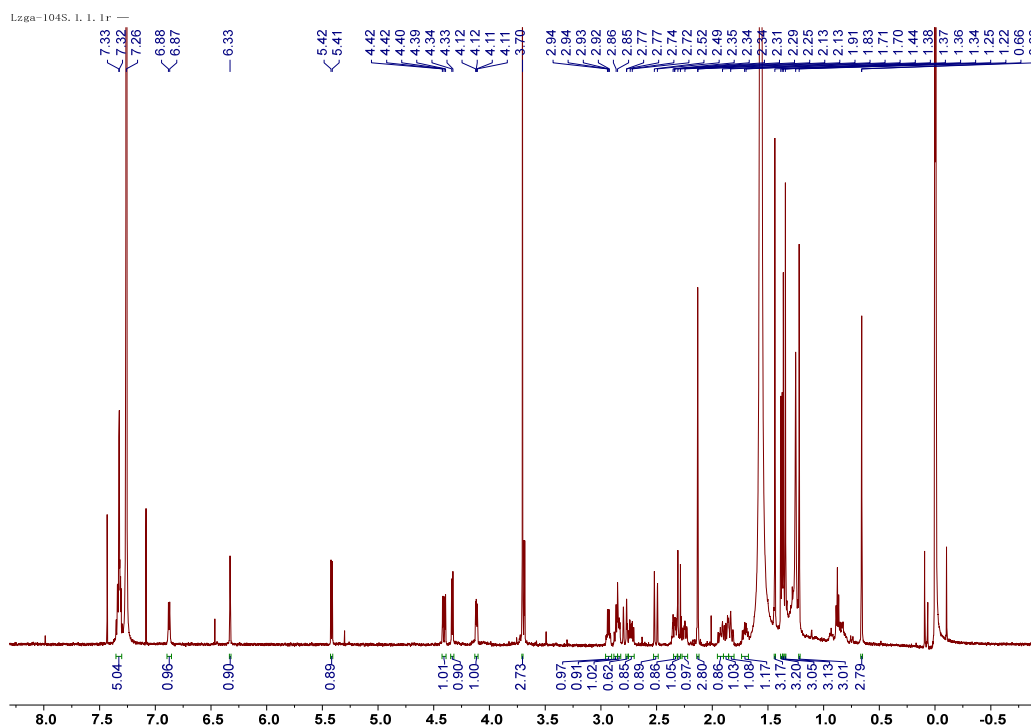

Figure S99.  $^1\text{H}$ - $^1\text{H}$  COSY spectrum of **2a**.

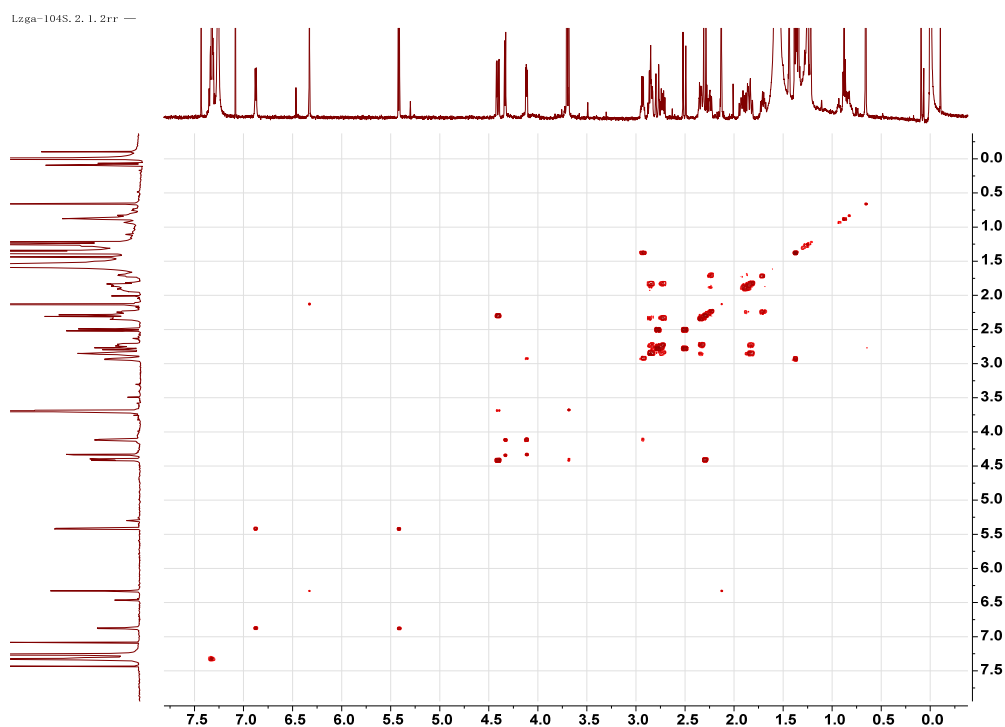

Figure S100.  $^1\text{H}$  NMR spectrum of **2b** (600 MHz,  $\text{CDCl}_3$ ).

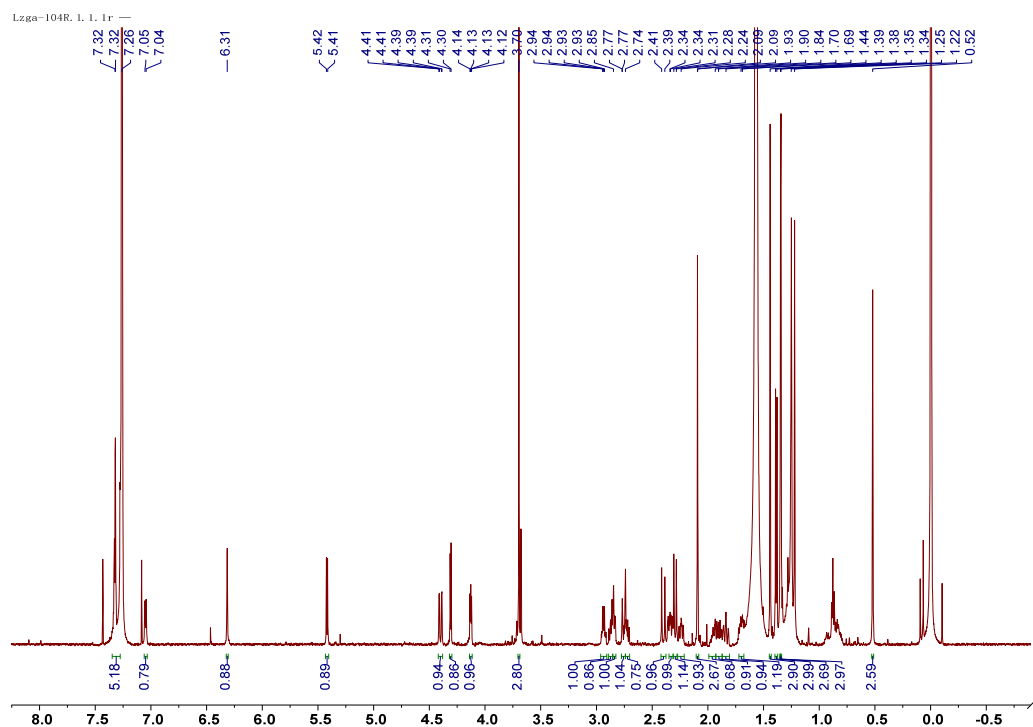

Figure S101.  $^1\text{H}$ - $^1\text{H}$  COSY spectrum of **2b**.

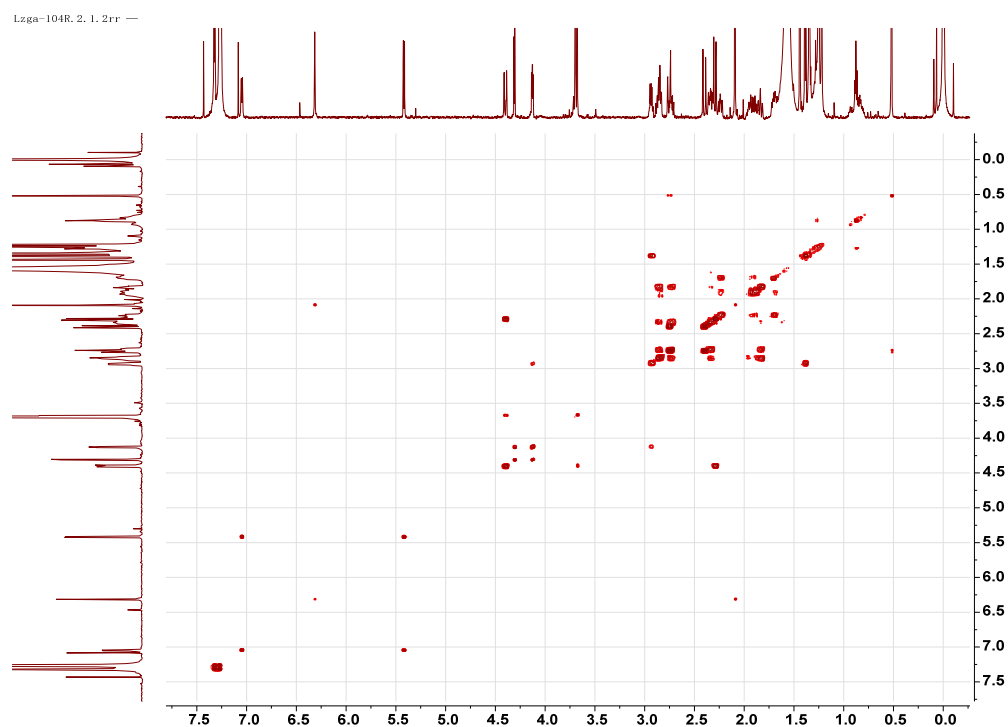

Figure S102. HRESIMS of **2a**.

D:\spectrum\...lzga-104\lzga-104s-2

2021/6/3 16:05:44

lzga-104s-2 #13 RT: 0.17 AV: 1 NL: 2.12E8

T: FTMS + p ESI Full ms [400.0000-1500.0000]

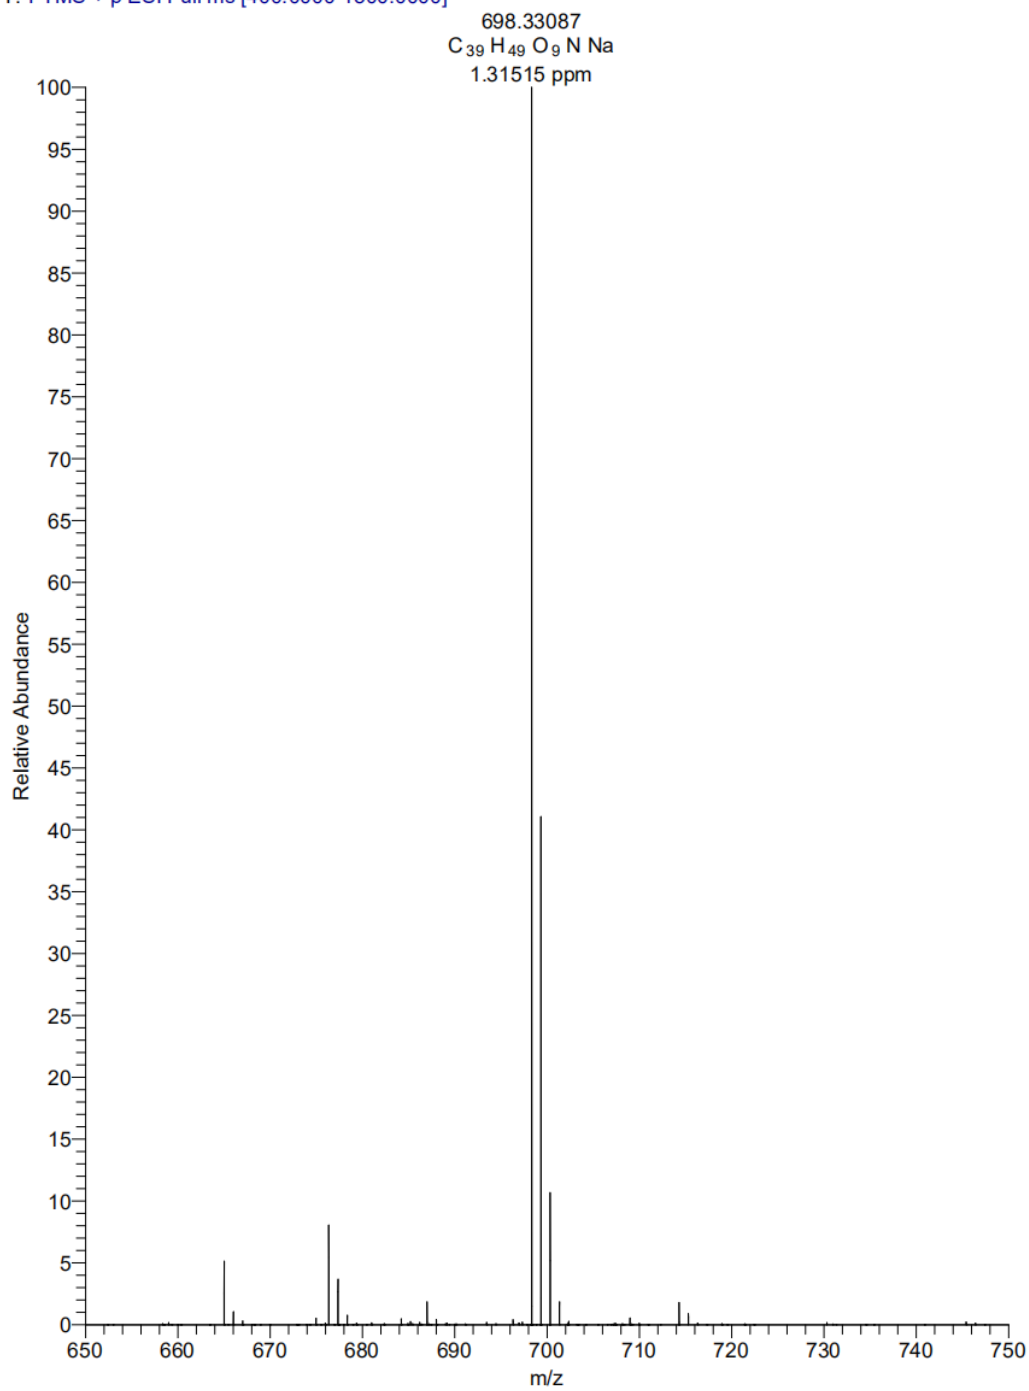

Figure S103. HRESIMS of **2b**.

LZGA-104R-2-1\_210826165528 #19 RT: 0.25 AV: 1 NL: 4.13E7  
T: FTMS + p ESI Full lock ms [150.0000-1100.0000]

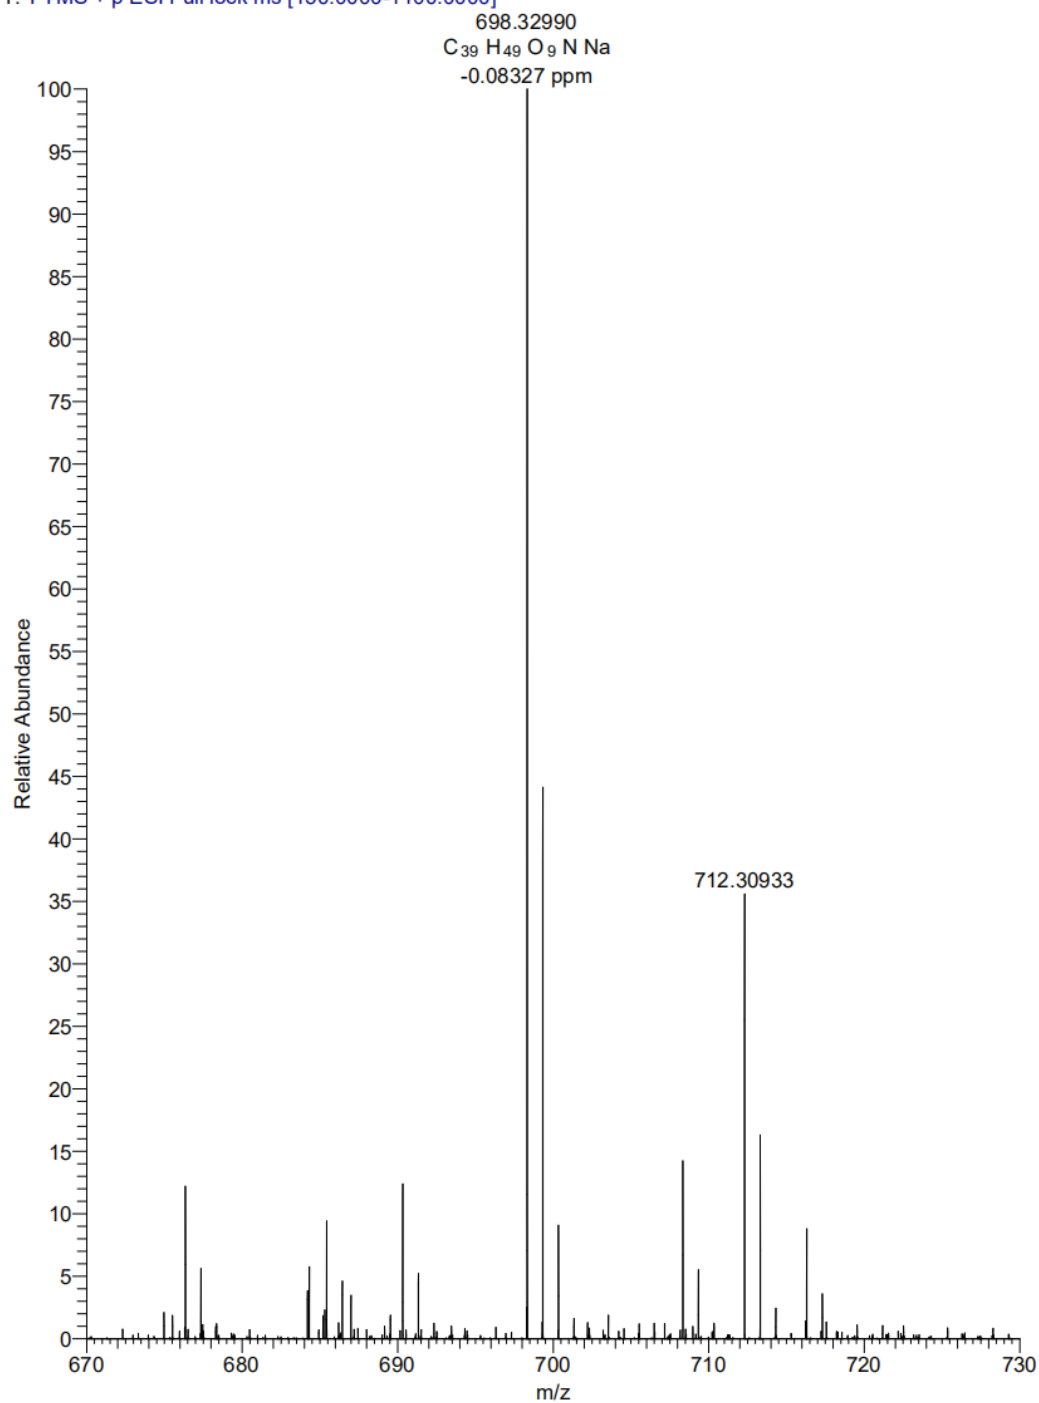



Figure S104.  $^1\text{H}$  NMR spectrum of **3a** (600 MHz,  $\text{CDCl}_3$ ).

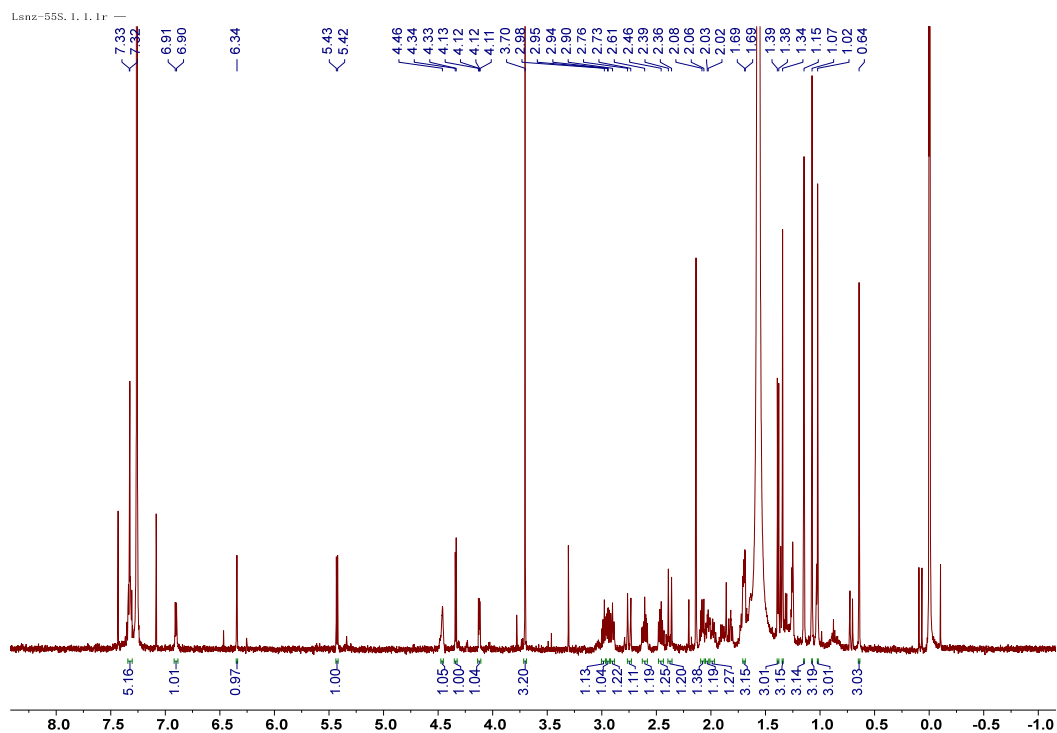

Figure S105.  $^1\text{H}$ - $^1\text{H}$  COSY spectrum of **3a**.

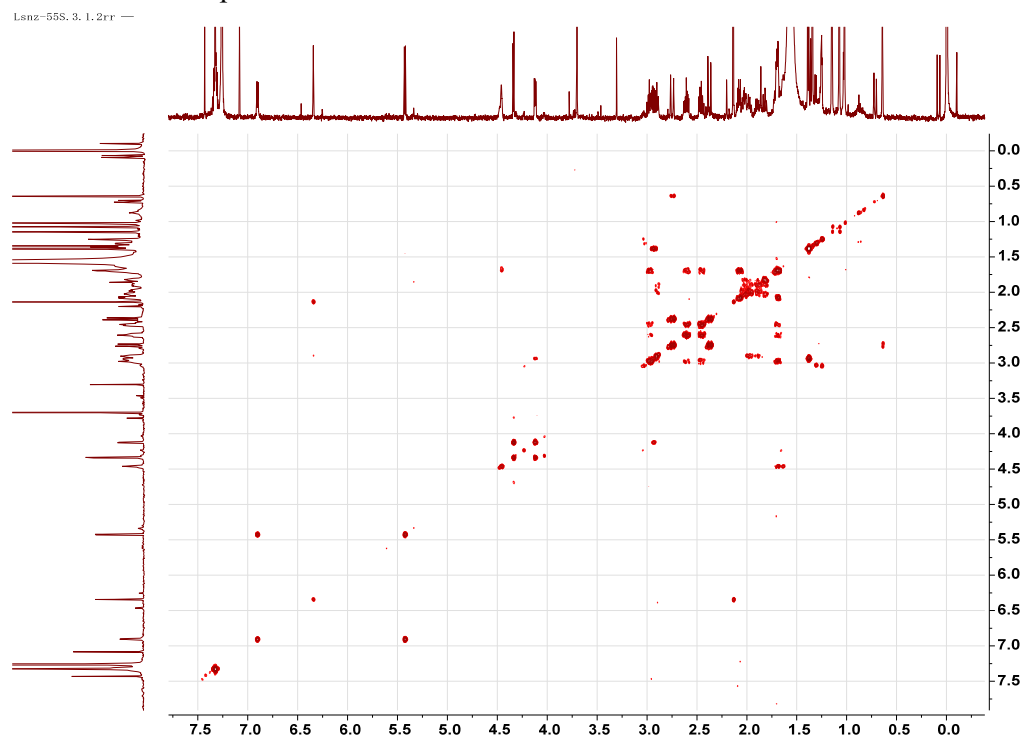

Figure S106.  $^1\text{H}$  NMR spectrum of **3b** (600 MHz,  $\text{CDCl}_3$ ).

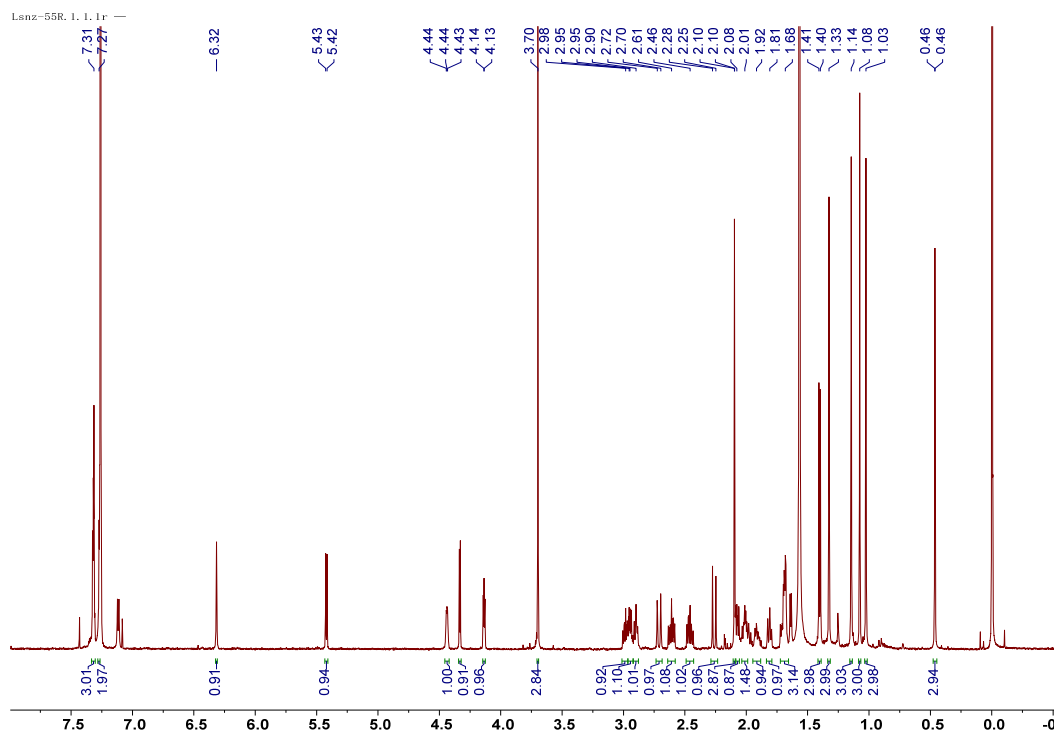

Figure S107.  $^1\text{H}$ - $^1\text{H}$  COSY spectrum of **3b**.

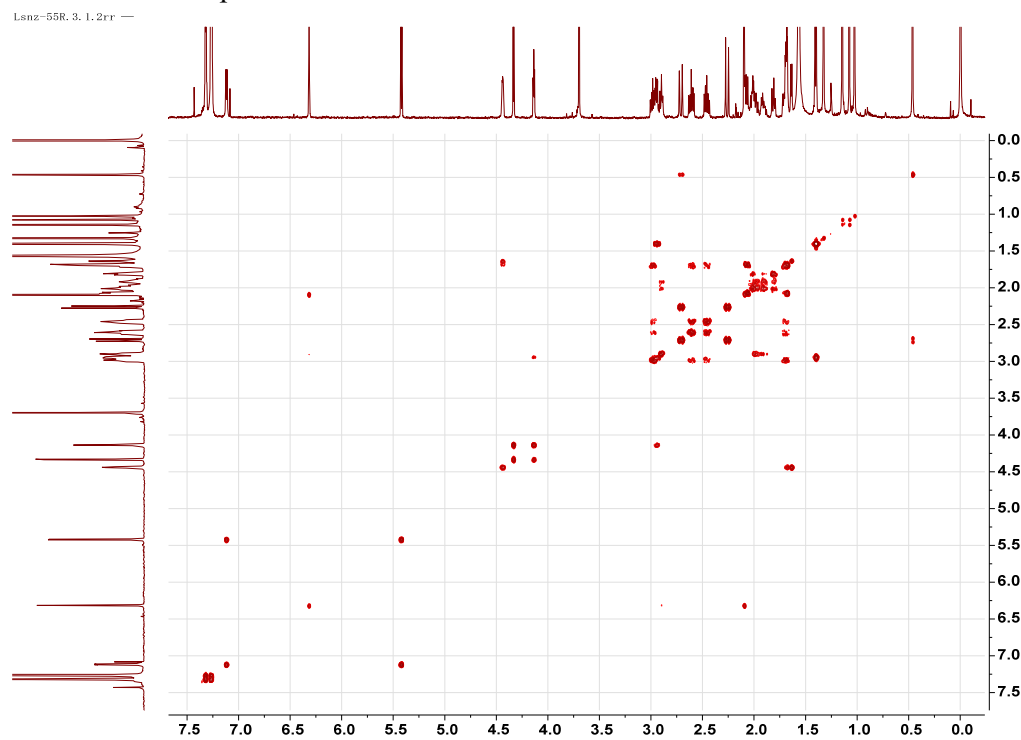

Figure S108. HRESIMS of **3a**.

LZGA-55S-2 #13 RT: 0.17 AV: 1 NL: 1.60E8  
T: FTMS + p ESI Full lock ms [100.0000-1000.0000]

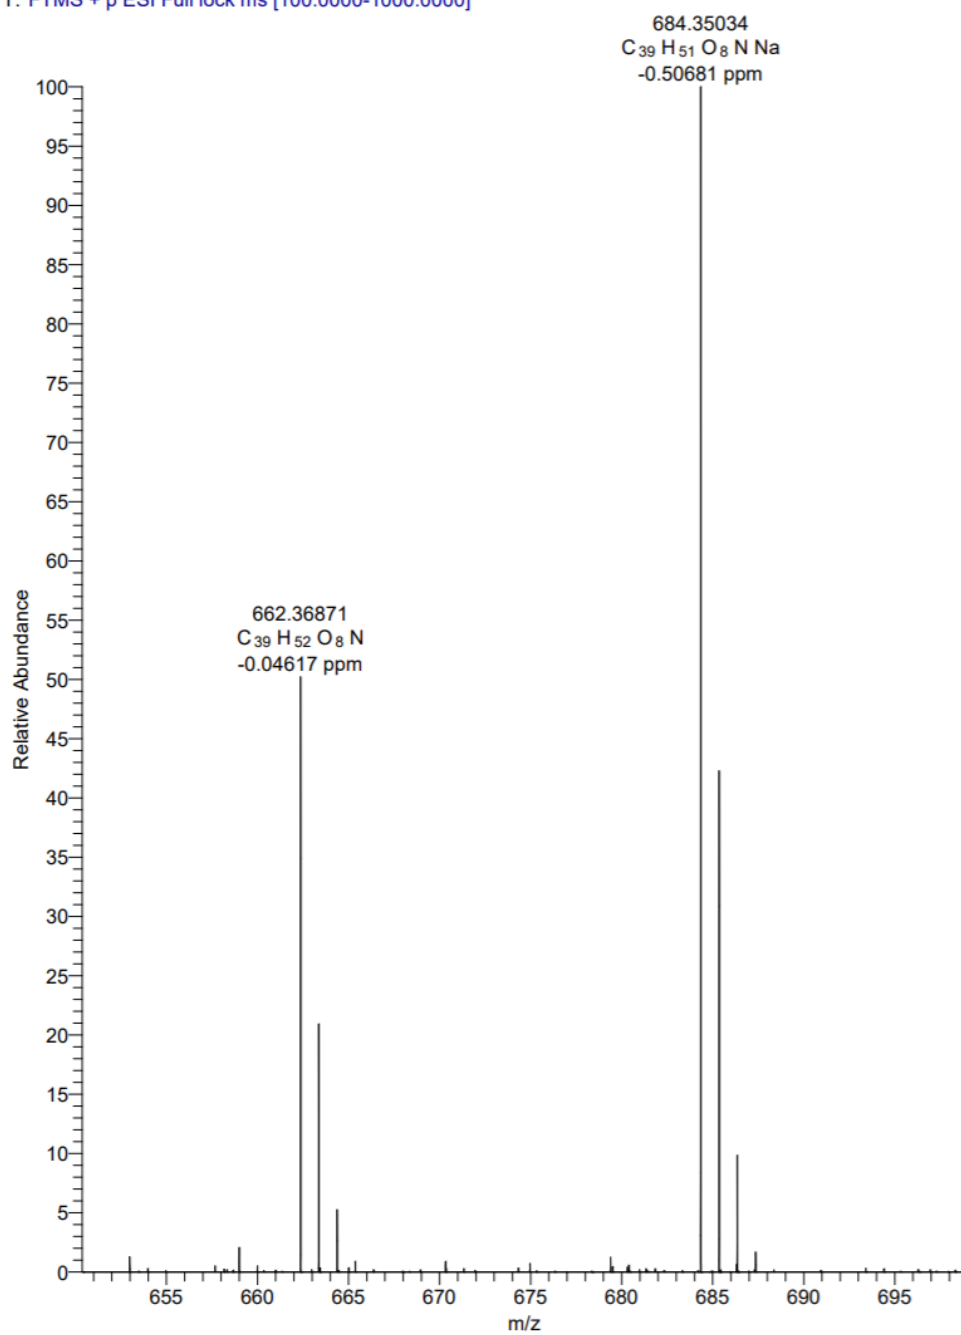

Figure S109. HRESIMS of **3b**.

LZGA-55R-2 #13 RT: 0.17 AV: 1 NL: 2.10E8  
T: FTMS + p ESI Full lock ms [100.0000-1000.0000]

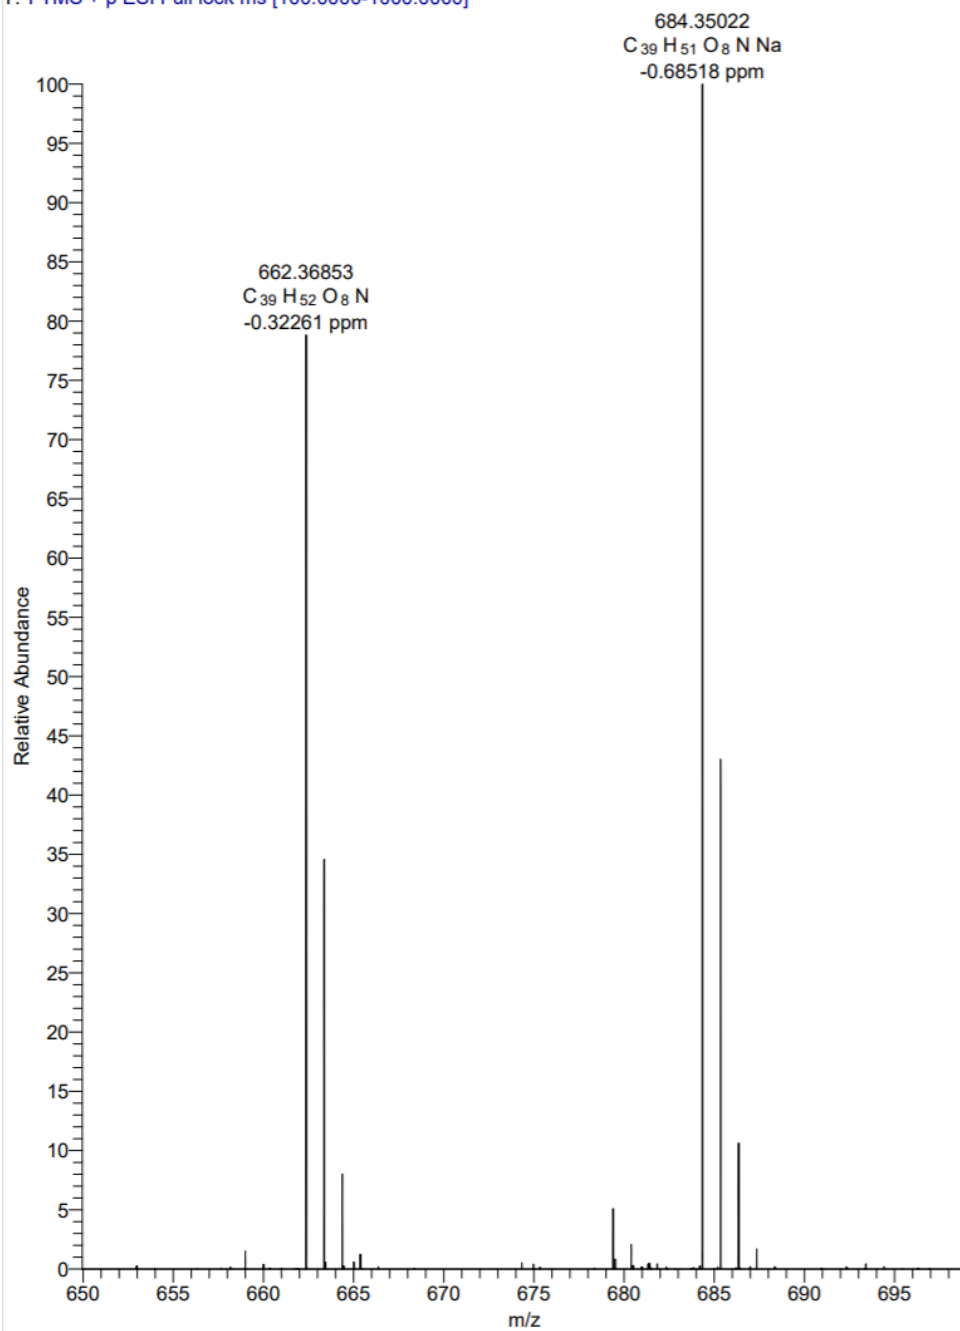

Figure S110.  $^1\text{H}$  NMR spectrum of **6H** (600 MHz,  $\text{CDCl}_3$ ).

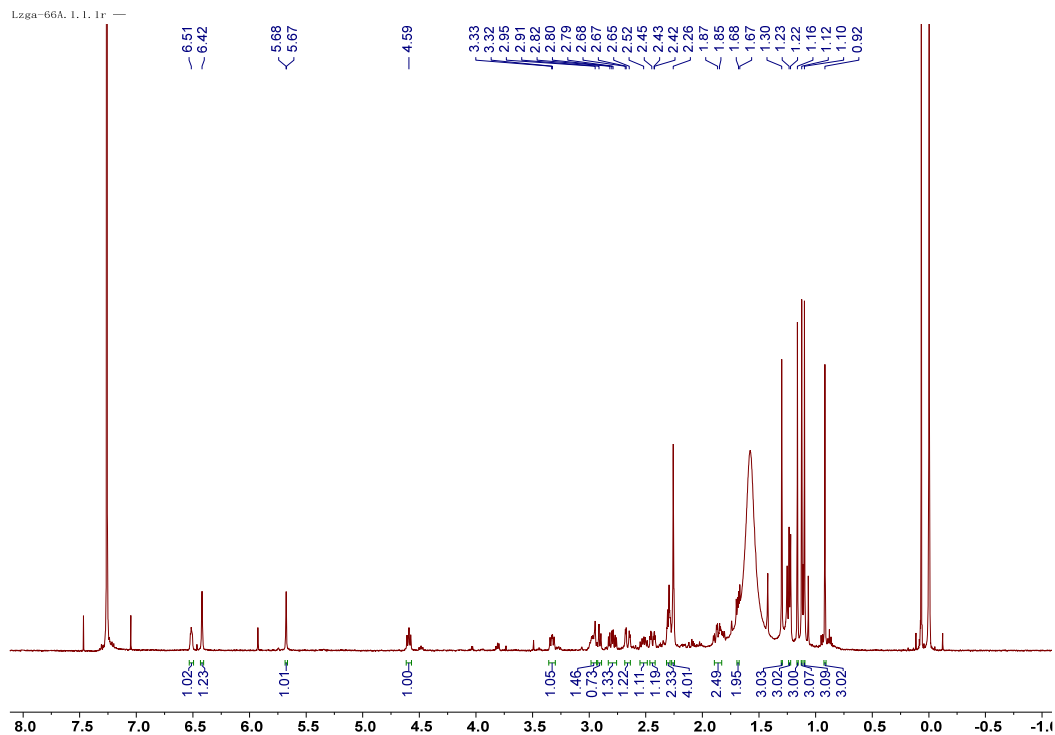

Figure S111.  $^{13}\text{C}$  NMR spectrum of **6H** (600 MHz,  $\text{CDCl}_3$ ).

Number of scans= 18000

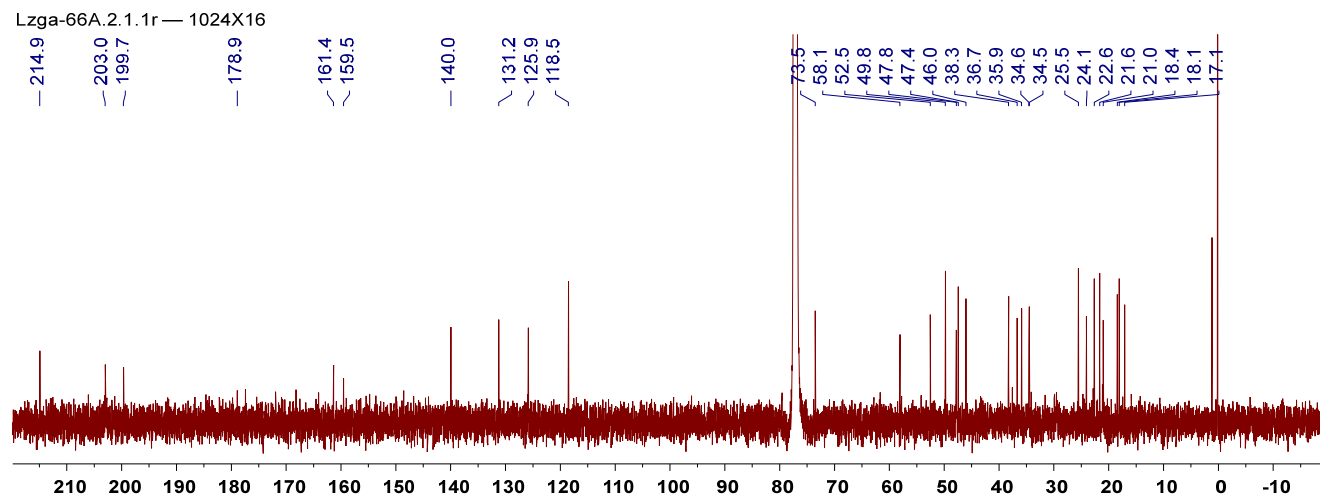

Figure S112.  $^1\text{H}$  NMR spectrum of **6Ha** (600 MHz,  $\text{CDCl}_3$ ).

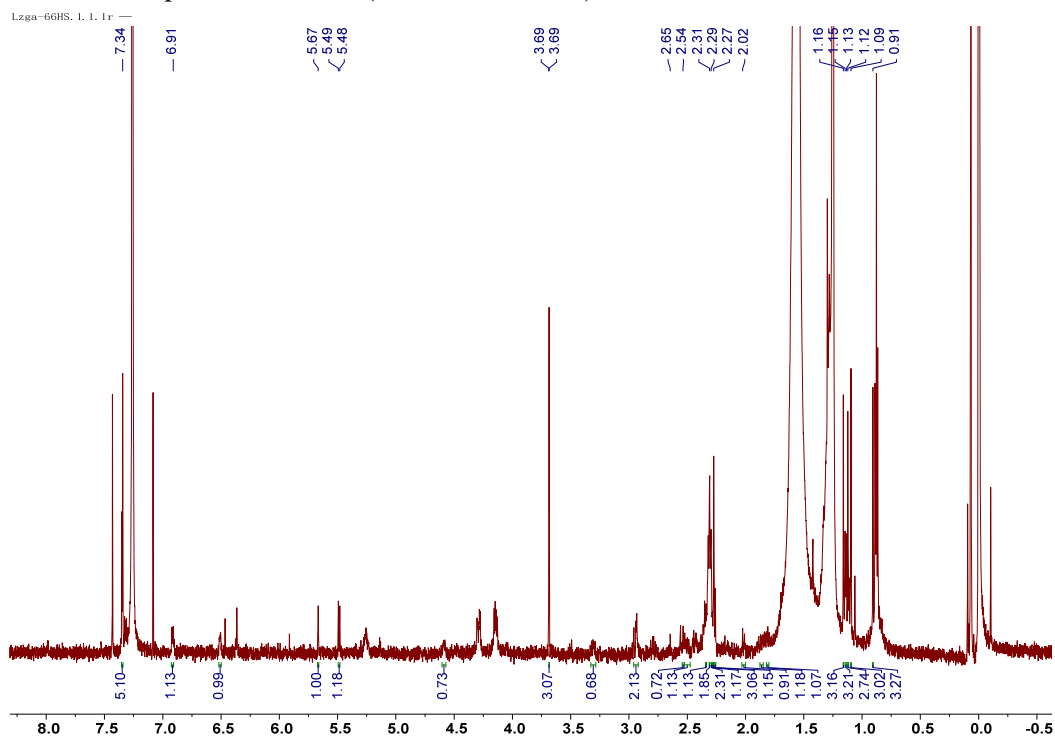

Figure S113.  $^1\text{H}$ - $^1\text{H}$  COSY spectrum of **6Ha**.

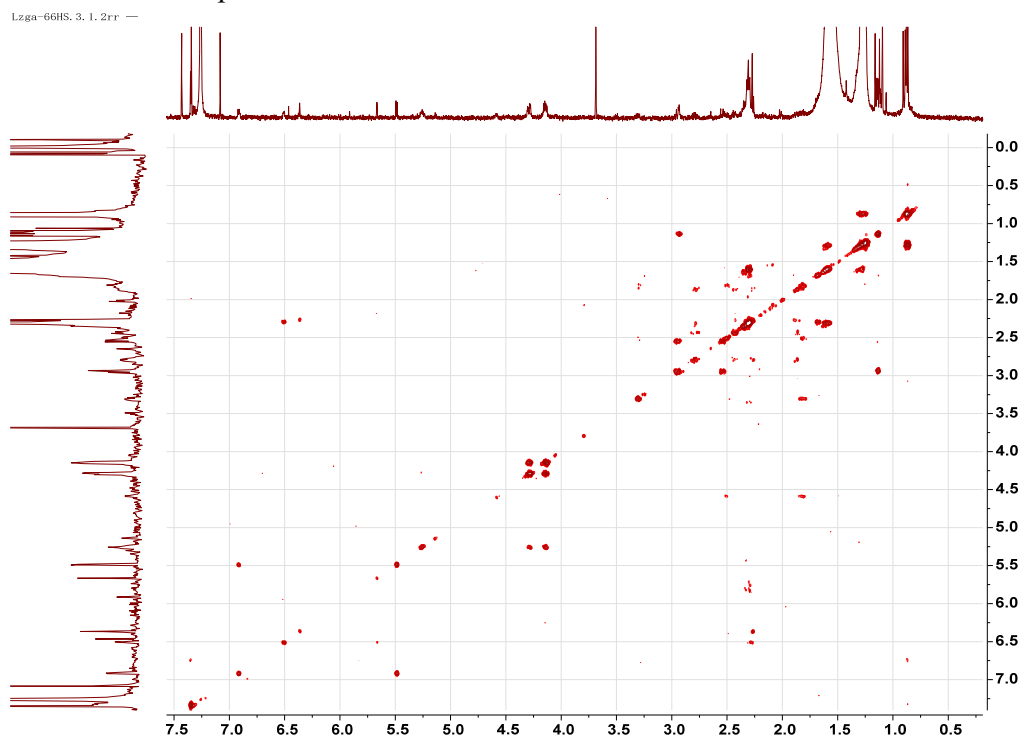

Figure S114.  $^1\text{H}$  NMR spectrum of **6Hb** (600 MHz,  $\text{CDCl}_3$ ).

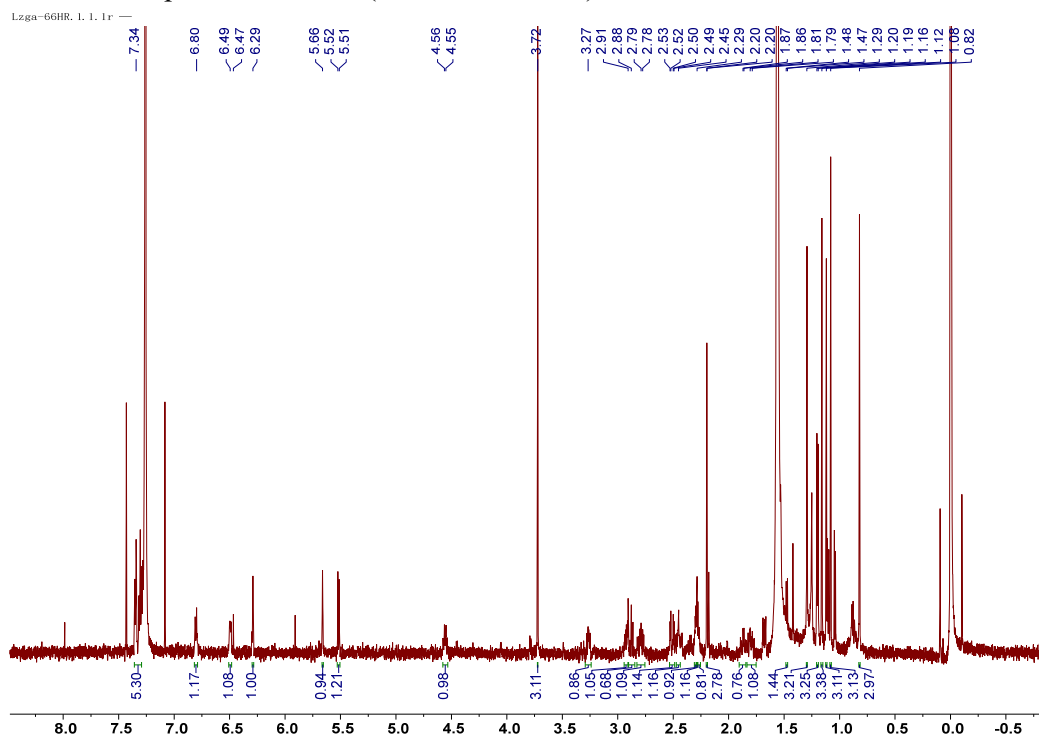

Figure S115.  $^1\text{H}$ - $^1\text{H}$  COSY spectrum of **6Hb**.

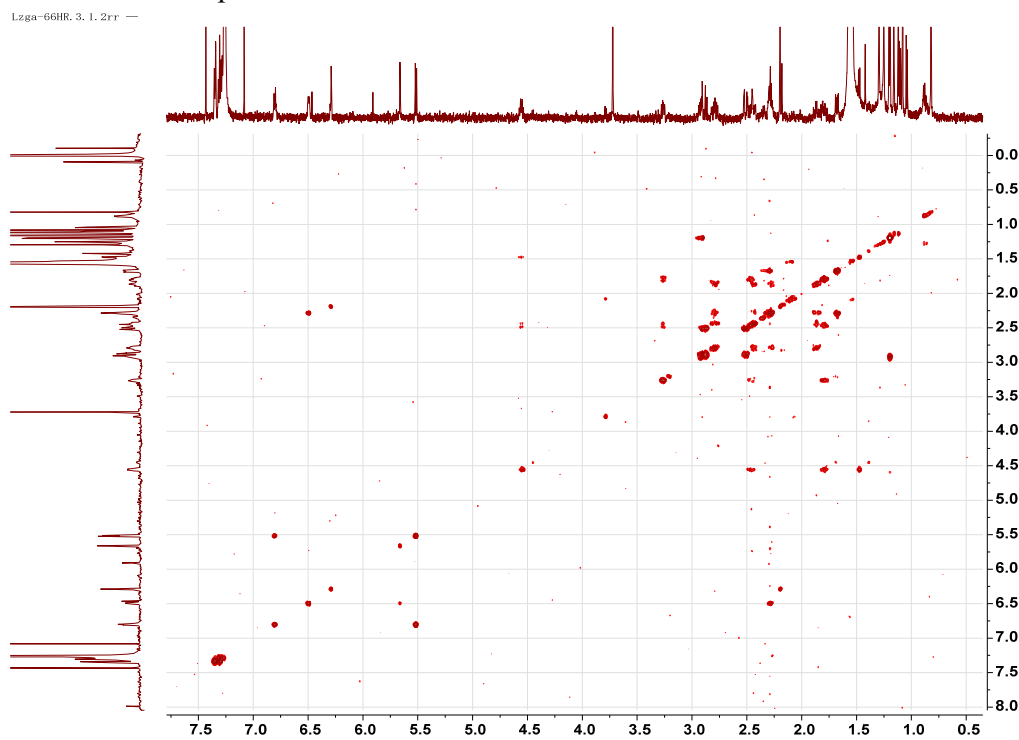

Figure S116. HRESIMS of **6Ha**.

ZGA-66HS #13 RT: 0.17 AV: 1 NL: 5.28E7  
: FTMS + p ESI Full lock ms [100.0000-1000.0000]

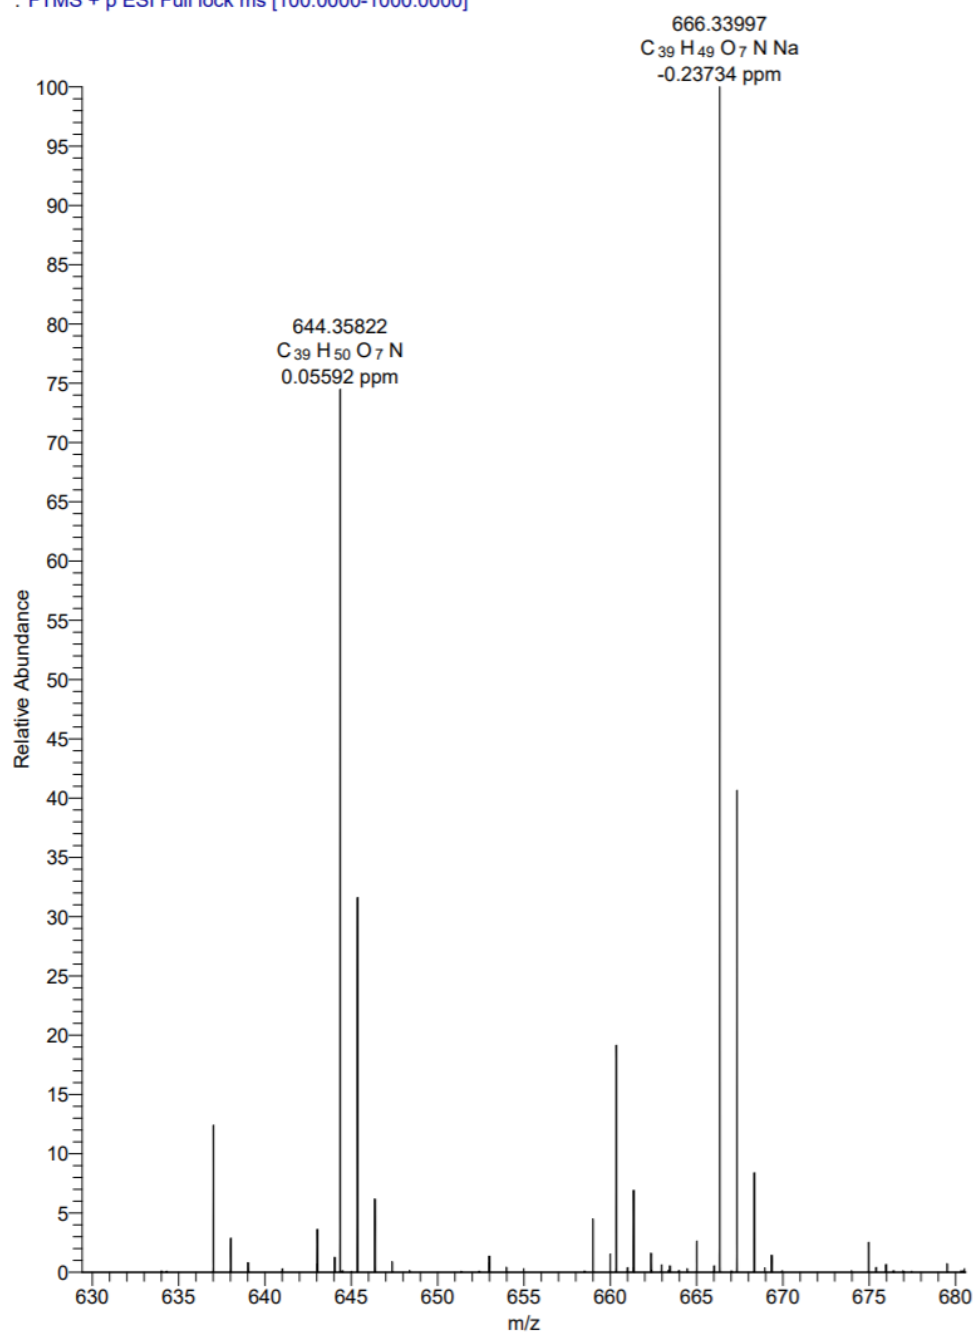



Figure S117. HRESIMS of **6Hb**.

LZGA-66HR #13 RT: 0.17 AV: 1 NL: 1.78E8  
T: FTMS + p ESI Full lock ms [100.0000-1000.0000]

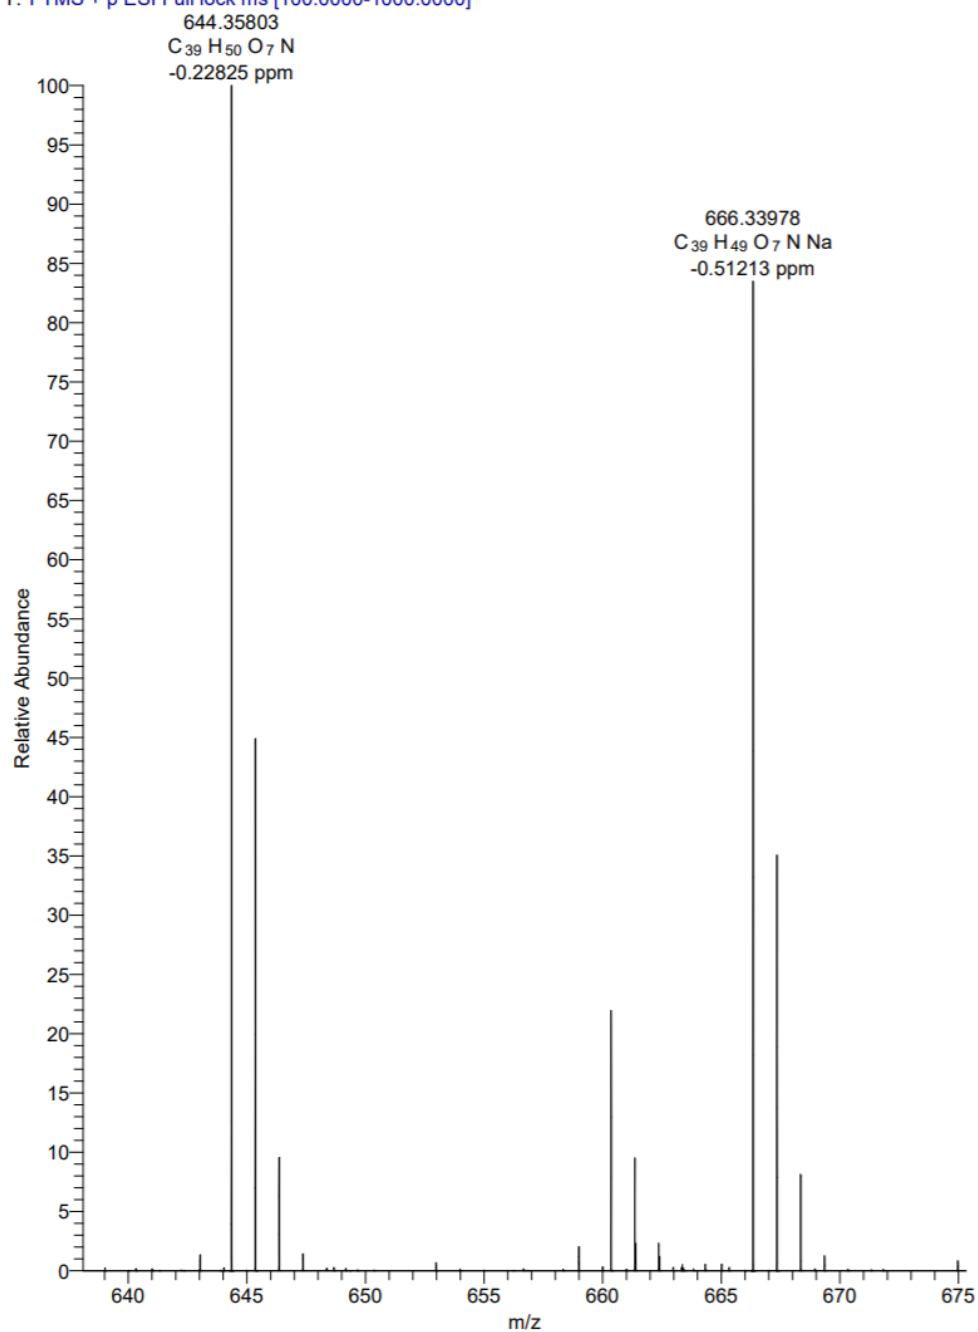

## 2. Spectroscopic data of compound 6.

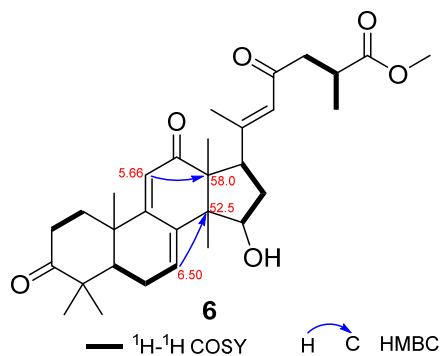

Figure S118 The key HMBC and  $^1\text{H}$ - $^1\text{H}$  COSY correlations of **6**.

Methyl gibbosate O (**6**): pale-yellow oil.  $[\alpha]_{\text{D}}^{24} +51.4$  ( $c$  0.05, MeOH); UV (MeOH)  $\lambda_{\text{max}}$  (log  $\epsilon$ ) 245.0 (4.16); HRESIMS  $m/z$  533.28693  $[\text{M} + \text{Na}]^+$  (calcd for  $\text{C}_{31}\text{H}_{42}\text{O}_6\text{Na}$ , 533.28791).

| No.               | <b>6</b> (600/150 MHz, $\text{CDCl}_3$ )                  |                     |
|-------------------|-----------------------------------------------------------|---------------------|
| 1                 | 2.27, ddd (13.8, 6.1, 3.0)<br>1.87, td (13.8, 4.7)        | 35.9, $\text{CH}_2$ |
| 2                 | 2.78, ddd (14.8, 13.8, 6.1)<br>2.43, ddd (14.8, 4.7, 3.0) | 34.5, $\text{CH}_2$ |
| 3                 |                                                           | 215.0, C            |
| 4                 |                                                           | 47.4, C             |
| 5                 | 1.68, dd (10.6, 5.6)                                      | 49.8, CH            |
| 6                 | 2.29, overlapped, 2H                                      | 24.0, $\text{CH}_2$ |
| 7                 | 6.50, m                                                   | 131.1, CH           |
| 8                 |                                                           | 140.0, C            |
| 9                 |                                                           | 161.2, C            |
| 10                |                                                           | 38.2, C             |
| 11                | 5.66, s                                                   | 118.5, CH           |
| 12                |                                                           | 203.0, C            |
| 13                |                                                           | 58.0, C             |
| 14                |                                                           | 52.5, C             |
| 15                | 4.58, t (8.4)                                             | 73.5, CH            |
| 16                | 2.51, dd (8.4, 7.2)<br>1.83, dd (10.9, 8.4)               | 36.7, $\text{CH}_2$ |
| 17                | 3.30, dd (10.9, 7.2)                                      | 45.8, CH            |
| 18                | 0.90, s                                                   | 18.1, $\text{CH}_3$ |
| 19                | 1.29, s                                                   | 21.6, $\text{CH}_3$ |
| 20                |                                                           | 157.8, C            |
| 21                | 2.22, s                                                   | 20.9, $\text{CH}_3$ |
| 22                | 6.37, s                                                   | 126.0, CH           |
| 23                |                                                           | 198.8, C            |
| 24                | 2.94, overlapped<br>2.55, dd (20.4, 8.6)                  | 47.9, $\text{CH}_2$ |
| 25                | 2.95, overlapped                                          | 35.0, CH            |
| 26                |                                                           | 176.8, C            |
| 27                | 1.18, d (7.0)                                             | 17.3, $\text{CH}_3$ |
| 28                | 1.11, s                                                   | 25.5, $\text{CH}_3$ |
| 29                | 1.15, s                                                   | 22.6, $\text{CH}_3$ |
| 30                | 1.08, s                                                   | 18.4, $\text{CH}_3$ |
| -OCH <sub>3</sub> | 3.67, s                                                   | 52.0, $\text{CH}_3$ |

### 3. Biological assays

#### 3.1 Cytotoxicity assays

The cytotoxicity assay procedures were same as previously reported [24]. The following human tumor cell lines were used: HL-60, SMMC-7721, A-549, MCF-7, and SW-480. All cells were cultured in RPMI-1640 medium (Hyclone, Logan, UT, USA), supplemented with 10% fetal bovine serum (FBS, Hyclone) at 37 °C in a humidified atmosphere with 5% CO<sub>2</sub>. Cell viability was assessed by conducting colorimetric measurements of the amount of insoluble formazan formed in living cells based on the reduction of 3-(4,5-dimethylthiazol-2-yl)-2,5-diphenyltetrazolium bromide (MTT) (Sigma, St. Louis, MO, USA). Briefly, 100 µL of adherent cells was seeded into each well of a 96-well cell culture plate and allowed to adhere for 12 h before test compound addition, while suspended cells were seeded just before test compound addition, both with an initial density of  $1 \times 10^5$  cells/mL in 100 µL of medium. Each tumor cell line was exposed to the test compound at various concentrations in triplicate for 48 h, with *cis*-platin and paclitaxel (Sigma) as positive control. After the incubation, MTT (100 µg) was added to each well, and the incubation continued for 4 h at 37 °C. The cells were lysed with 100 µL of 20% SDS-50% DMF after removal of 100 µL of medium. The optical density of the lysate was measured at 595 nm in a 96-well microtiter plate reader (Bio-Rad 680). The IC<sub>50</sub> value of each compound was calculated by Reed and Muench's method.

#### 3.2 $\alpha$ -Glucosidase inhibition assays

The  $\alpha$ -glucosidase inhibition assay procedures were same as previously reported [25]. A mixture containing 25 µL of different compounds (final concentrations of 0.78, 1.56, 3.13, 6.25, 12.50, 25.00, 50.00 µM), 25 µL of  $\alpha$ -glucosidase (0.2 U/mL, from *Saccharomyces cerevisiae*, Sigma), and 175 µL of phosphate buffer (100 mM, pH 6.8) was pre-incubated for 10 min at room temperature. Then the reaction was started by the addition of 25 µL of 25 mM *p*-nitrophenyl- $\alpha$ -D-glucopyranoside (Sigma) and incubated for 15 min at 37 °C. The assay was conducted in a 96-well plate, and the absorbance was determined at 405 nm using a Spark™ 10 M microplate reader (Tecan). The control was prepared by adding phosphate buffer instead of the compound. The blank was prepared by adding phosphate buffer instead of  $\alpha$ -glucosidase using the same method. The  $\alpha$ -glucosidase inhibition rate (%) =  $[(OD_{\text{control}} - OD_{\text{control blank}}) - (OD_{\text{sample}} - OD_{\text{sample blank}})] / (OD_{\text{control}} - OD_{\text{control blank}}) \times 100\%$ . IC<sub>50</sub> values were calculated through non-linear regression using GraphPad Prism5 Software. Acarbose was utilized as the positive control with an IC<sub>50</sub> value of  $793.79 \pm 0.41$  µM.

#### 3.3 Protein tyrosine phosphate 1 $\beta$ (PTP1B) inhibition assays

The PTP1B inhibition assay procedures were same as previously reported [26].

#### 3.2 Dipeptidyl peptidase 4 (DDP4) inhibition assays

The DDP4 inhibition assay procedures were same as previously reported [27].

#### 3.3 Angiotensin converting enzyme 2 (ACE2) inhibition assays

The ACE2 inhibition assay procedures were same as previously reported [28].
